# Supplementary material for: A Range Finding Protocol to Support Design for Transcriptomics Experimentation: Examples of In-Vitro and In-Vivo Murine UV Exposure
Source: PubMed Central journal article supplement (PMC4019648; doi:10.1371/journal.pone.0097089), 2014-05-13

Figure S3. Cellular process specific responses in the *in-vitro* experiment design space

The potential sweet spots in the *in-vitro* range-finding experiment diagrams for all 64 tested gene sets (same set up as Figure 4A).

# BC\_apoptosis\_caspase\_induced\_GST\_vs\_0\_in\_time\_FDR

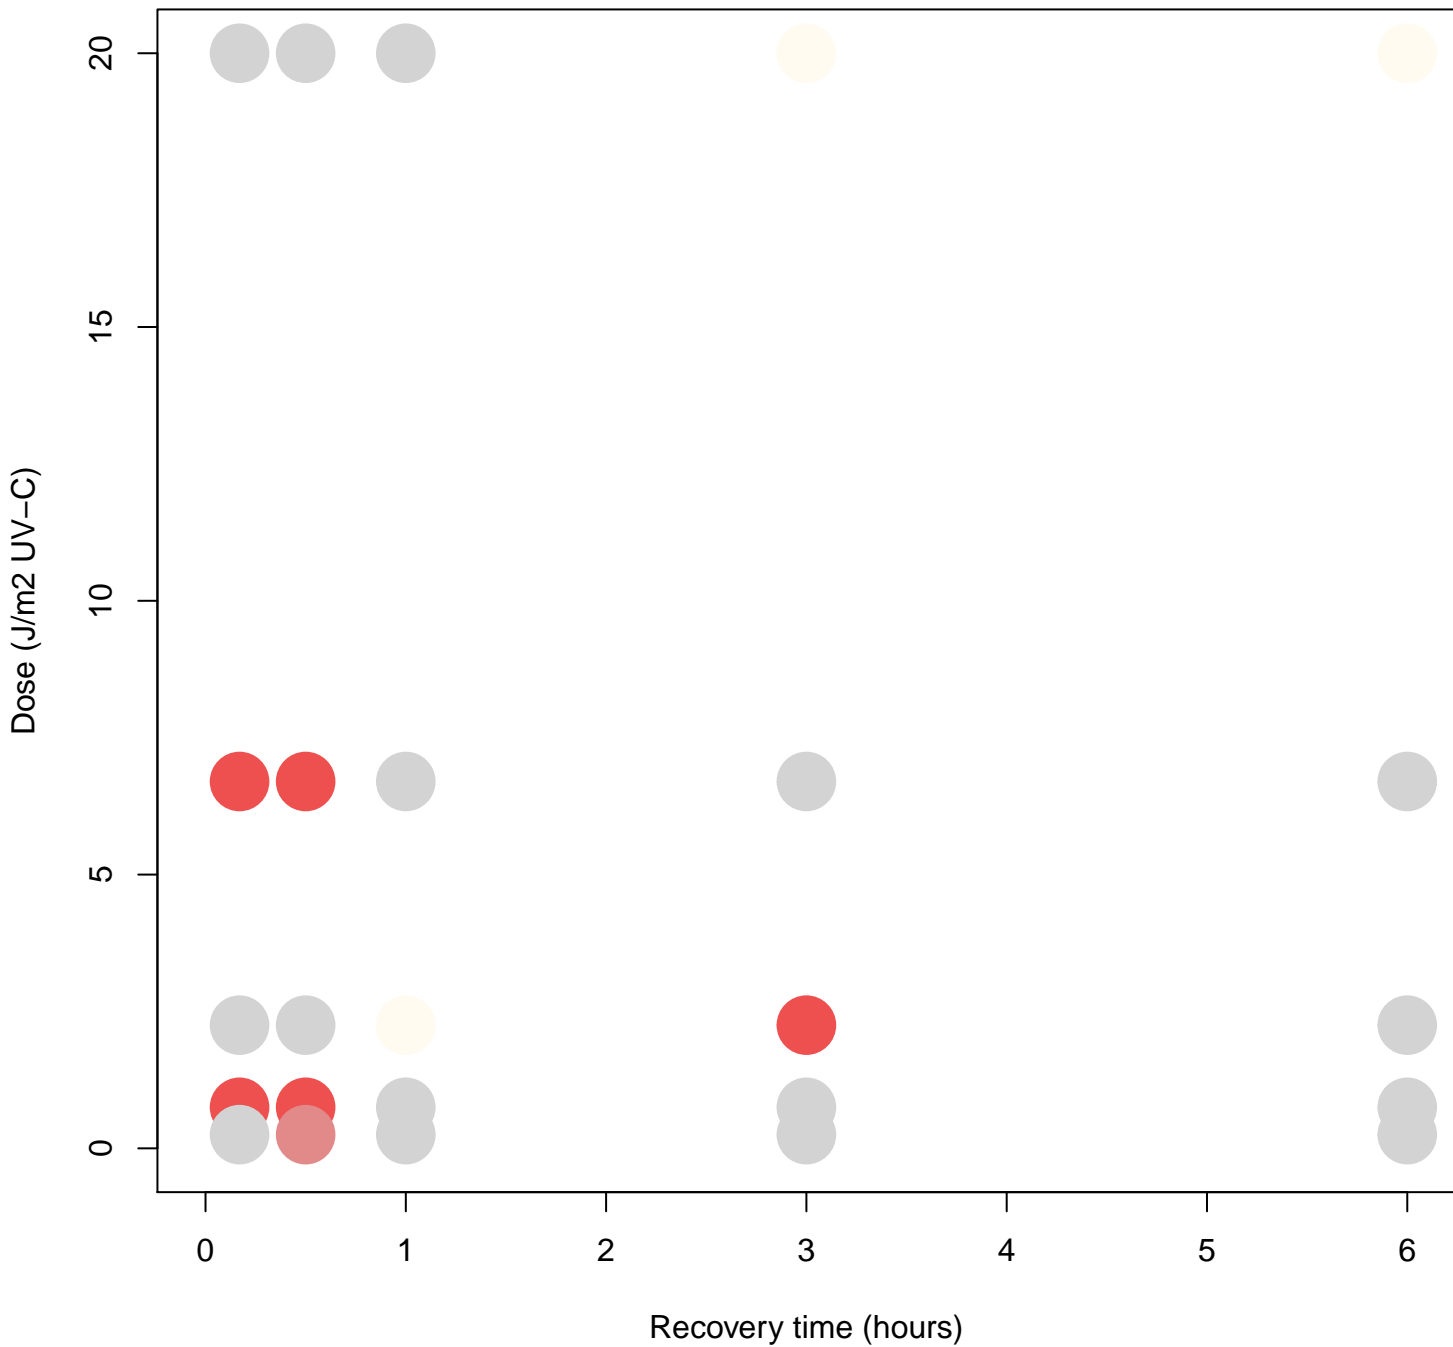

# BC\_apoptosis\_caspase\_induced.1\_GST\_vs\_0\_in\_time\_FDR

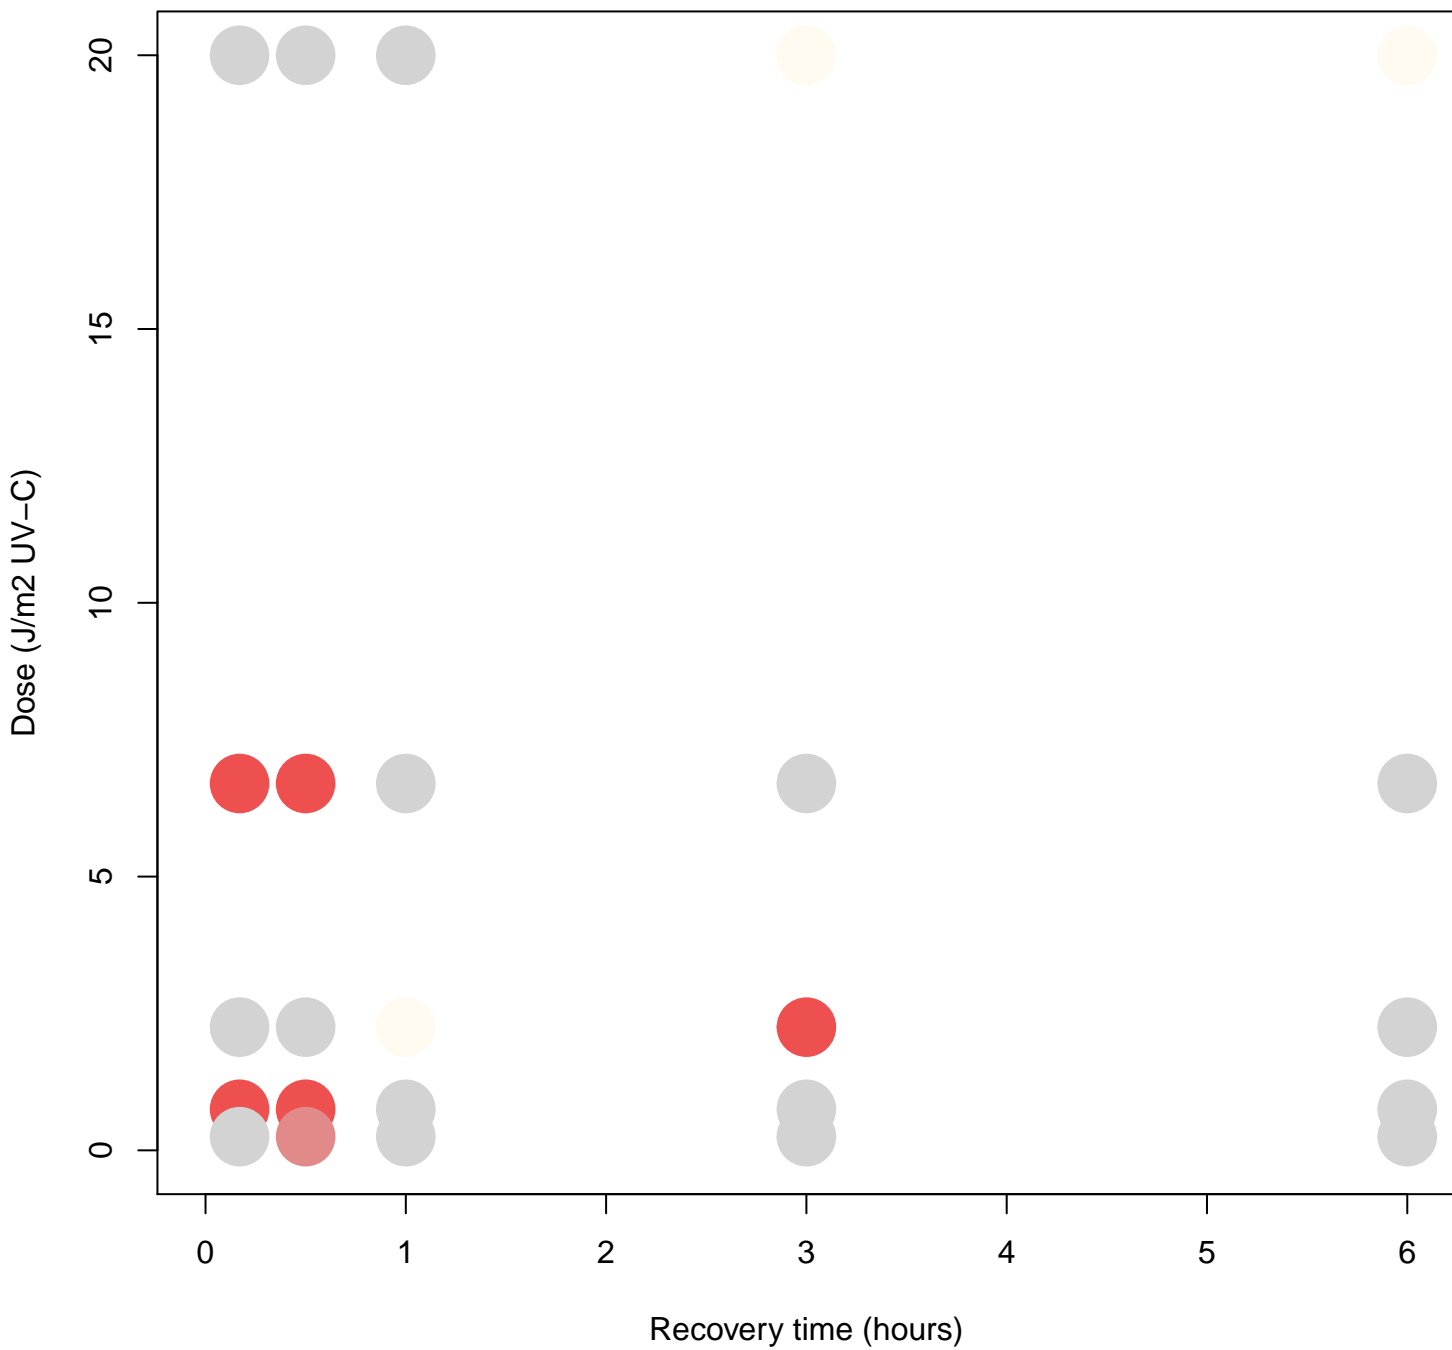

# BC\_ATM\_signalling\_pathway\_GST\_vs\_0\_in\_time\_FDR

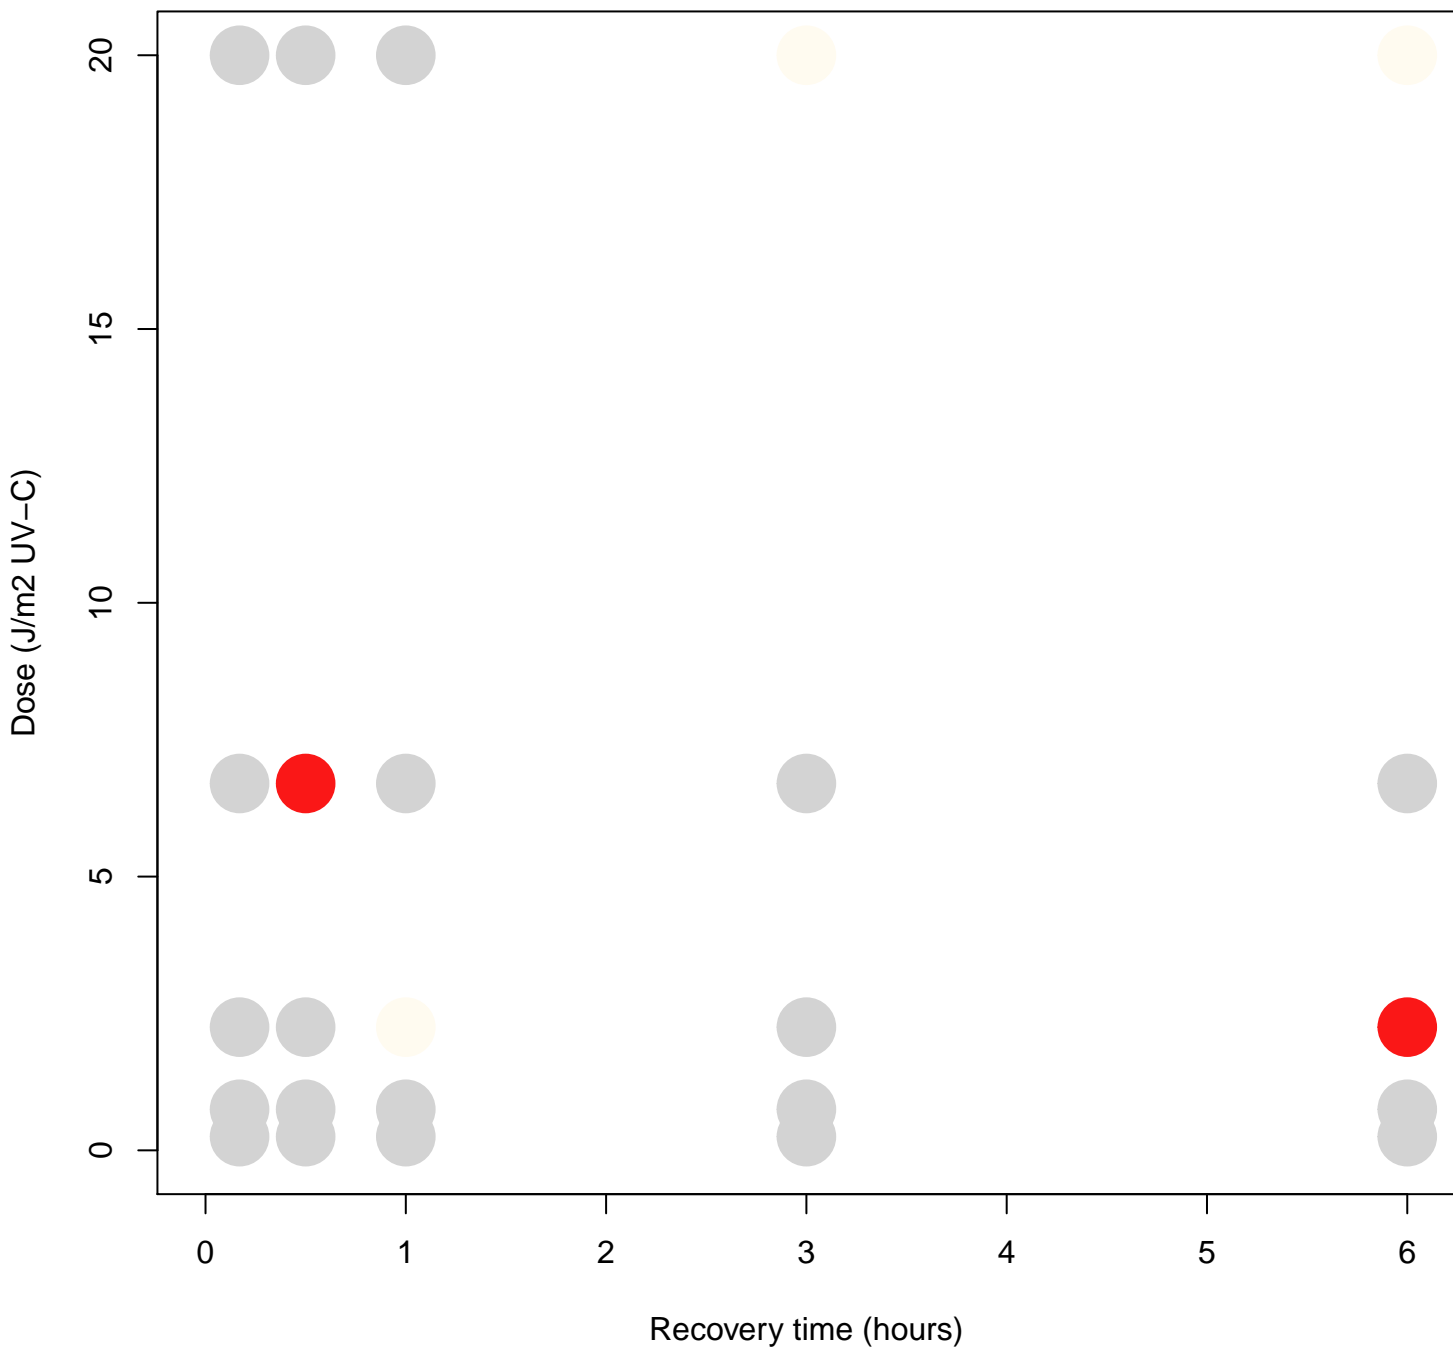

BC\_Cell\_cycle\_checkpoint\_GST\_vs\_0\_in\_time\_FDR

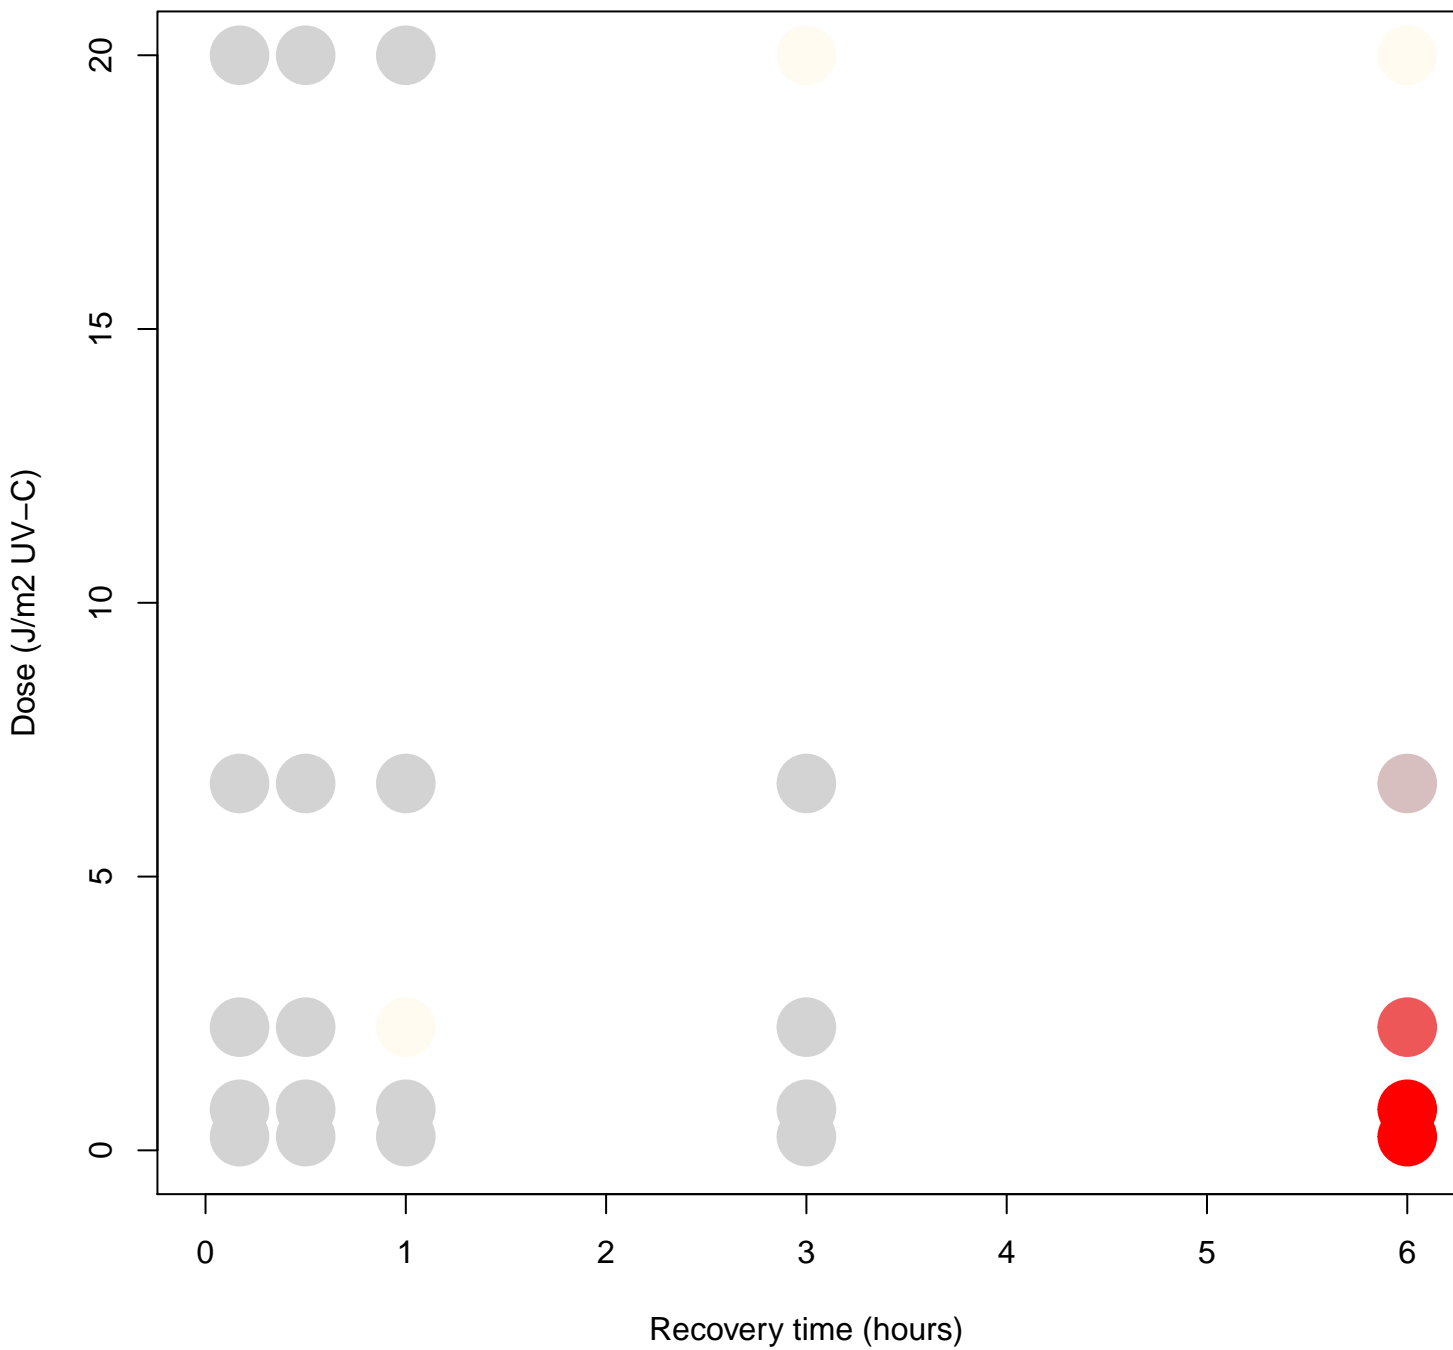

# BC\_Cyclins\_and\_Cell\_Cycle\_Regulation\_pathway\_GST\_vs\_0\_in\_time\_FDR

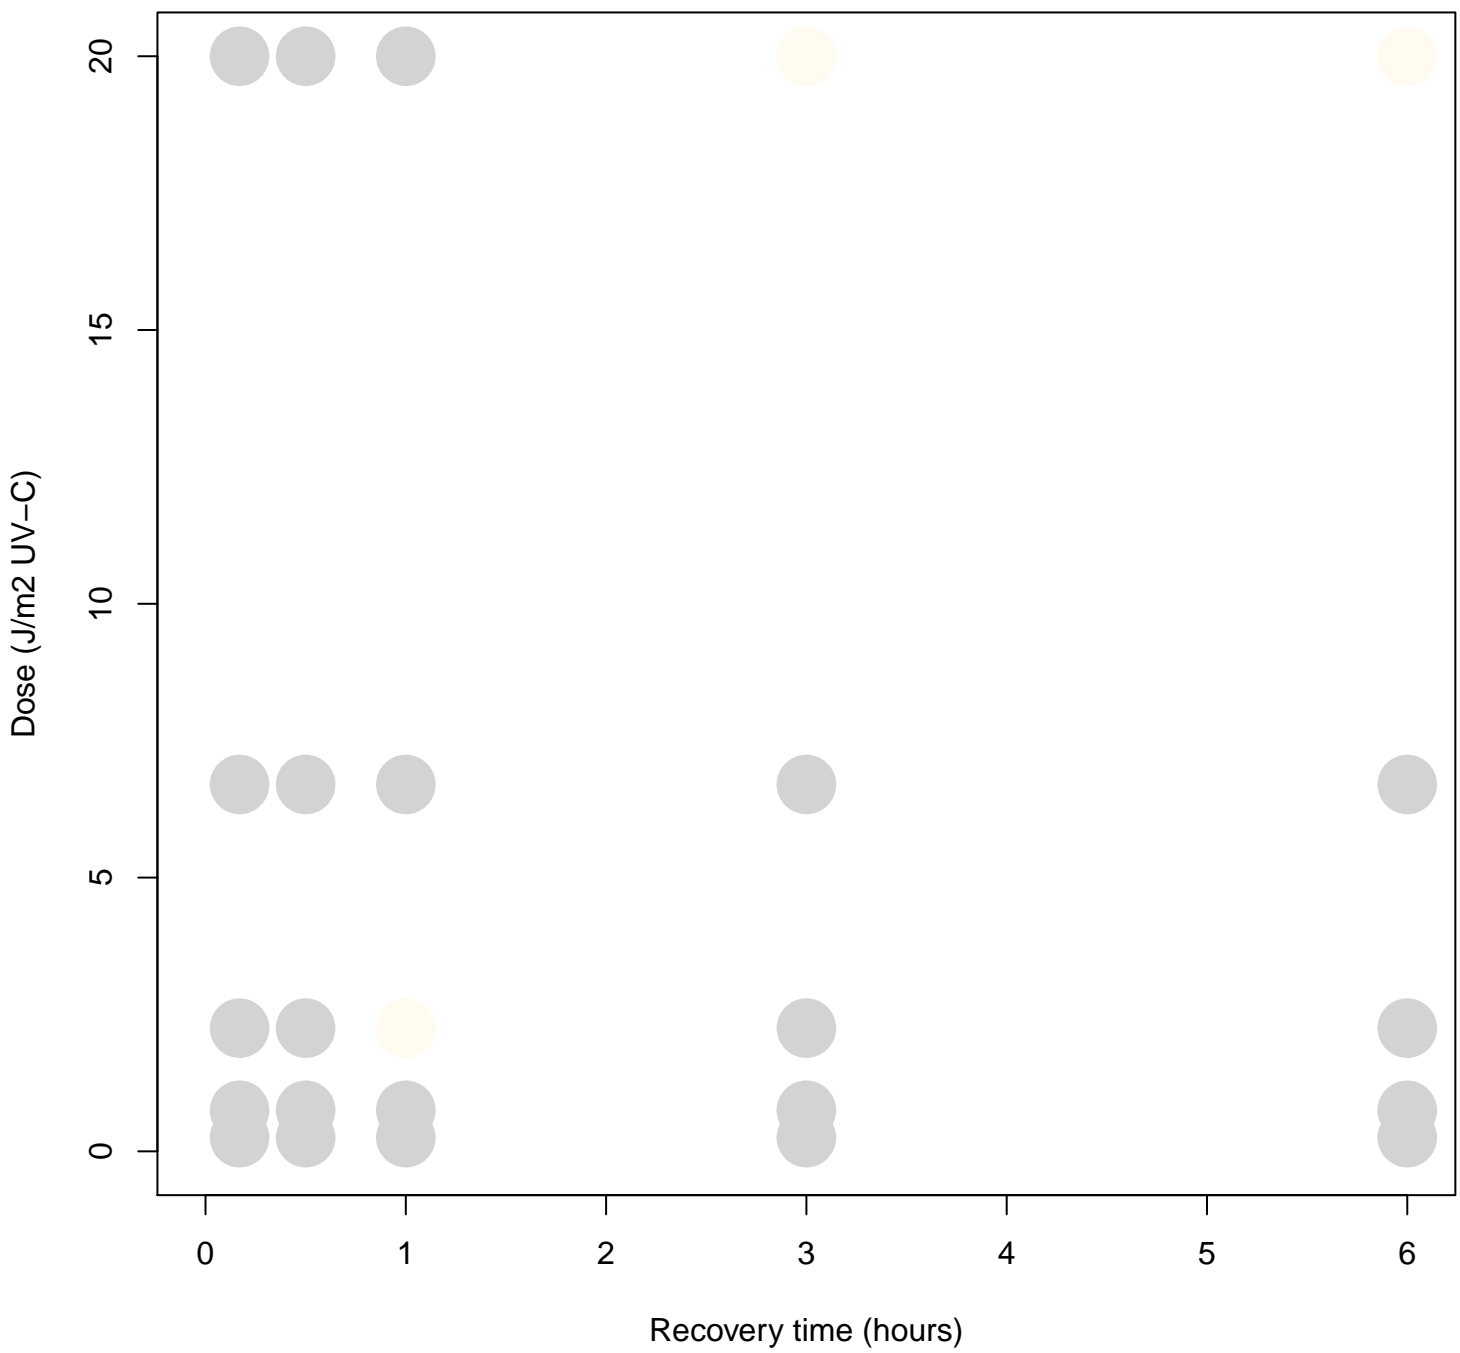

# BC\_G1.S\_check\_point\_GST\_vs\_0\_in\_time\_FDR

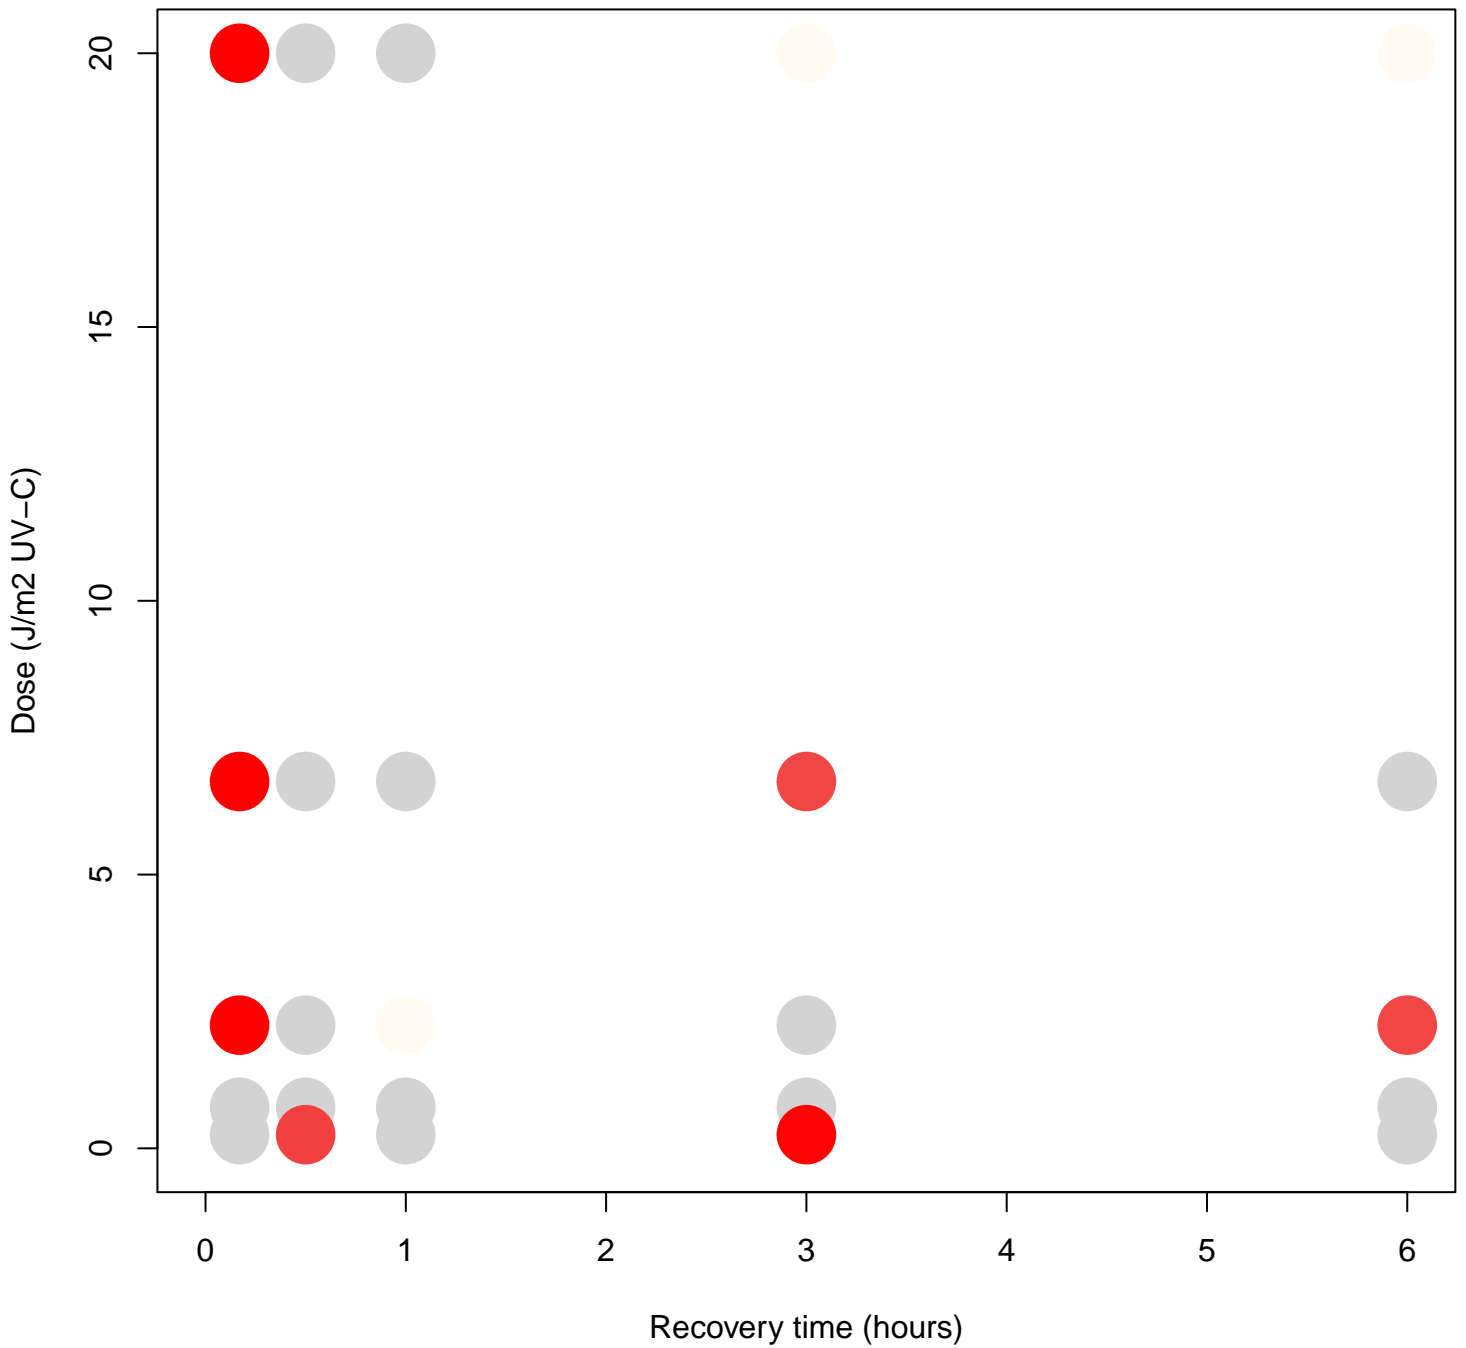

BC\_G2.M\_checkpoint\_GST\_vs\_0\_in\_time\_FDR

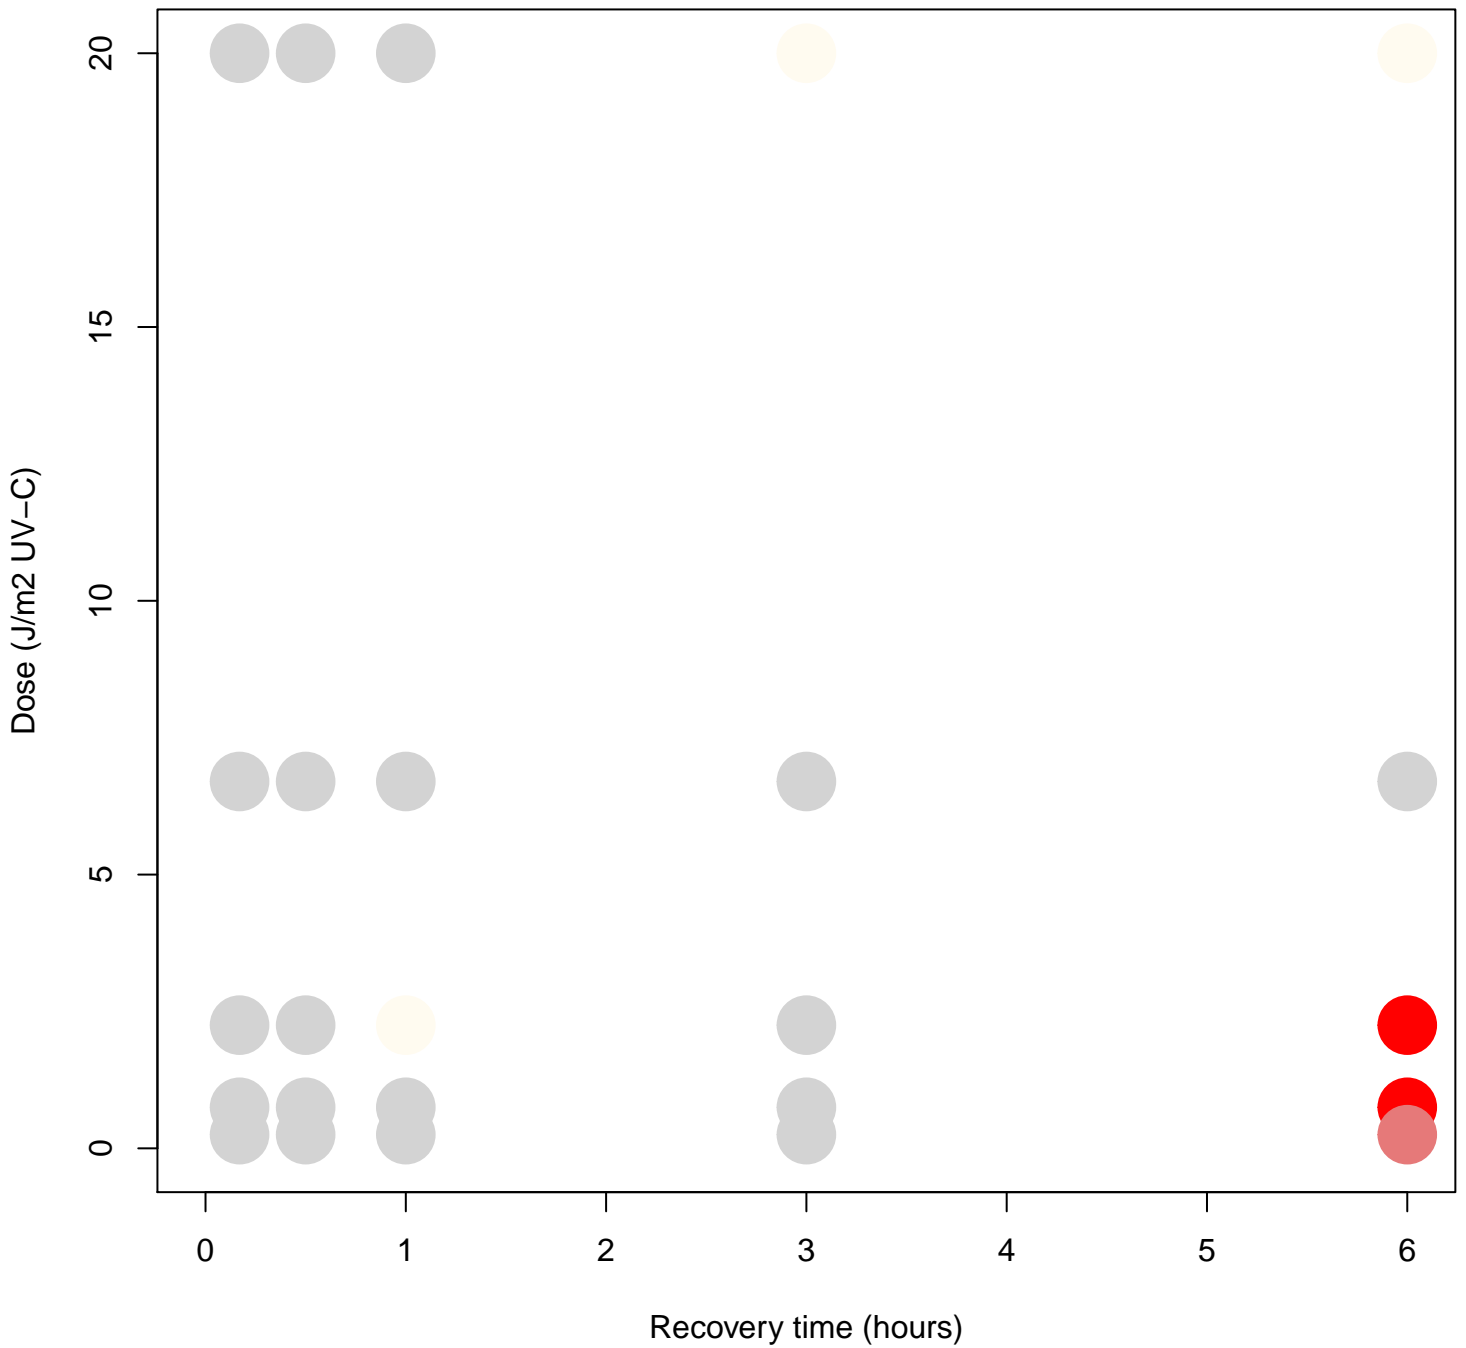



BC\_M\_arrest\_GST\_vs\_0\_in\_time\_FDR

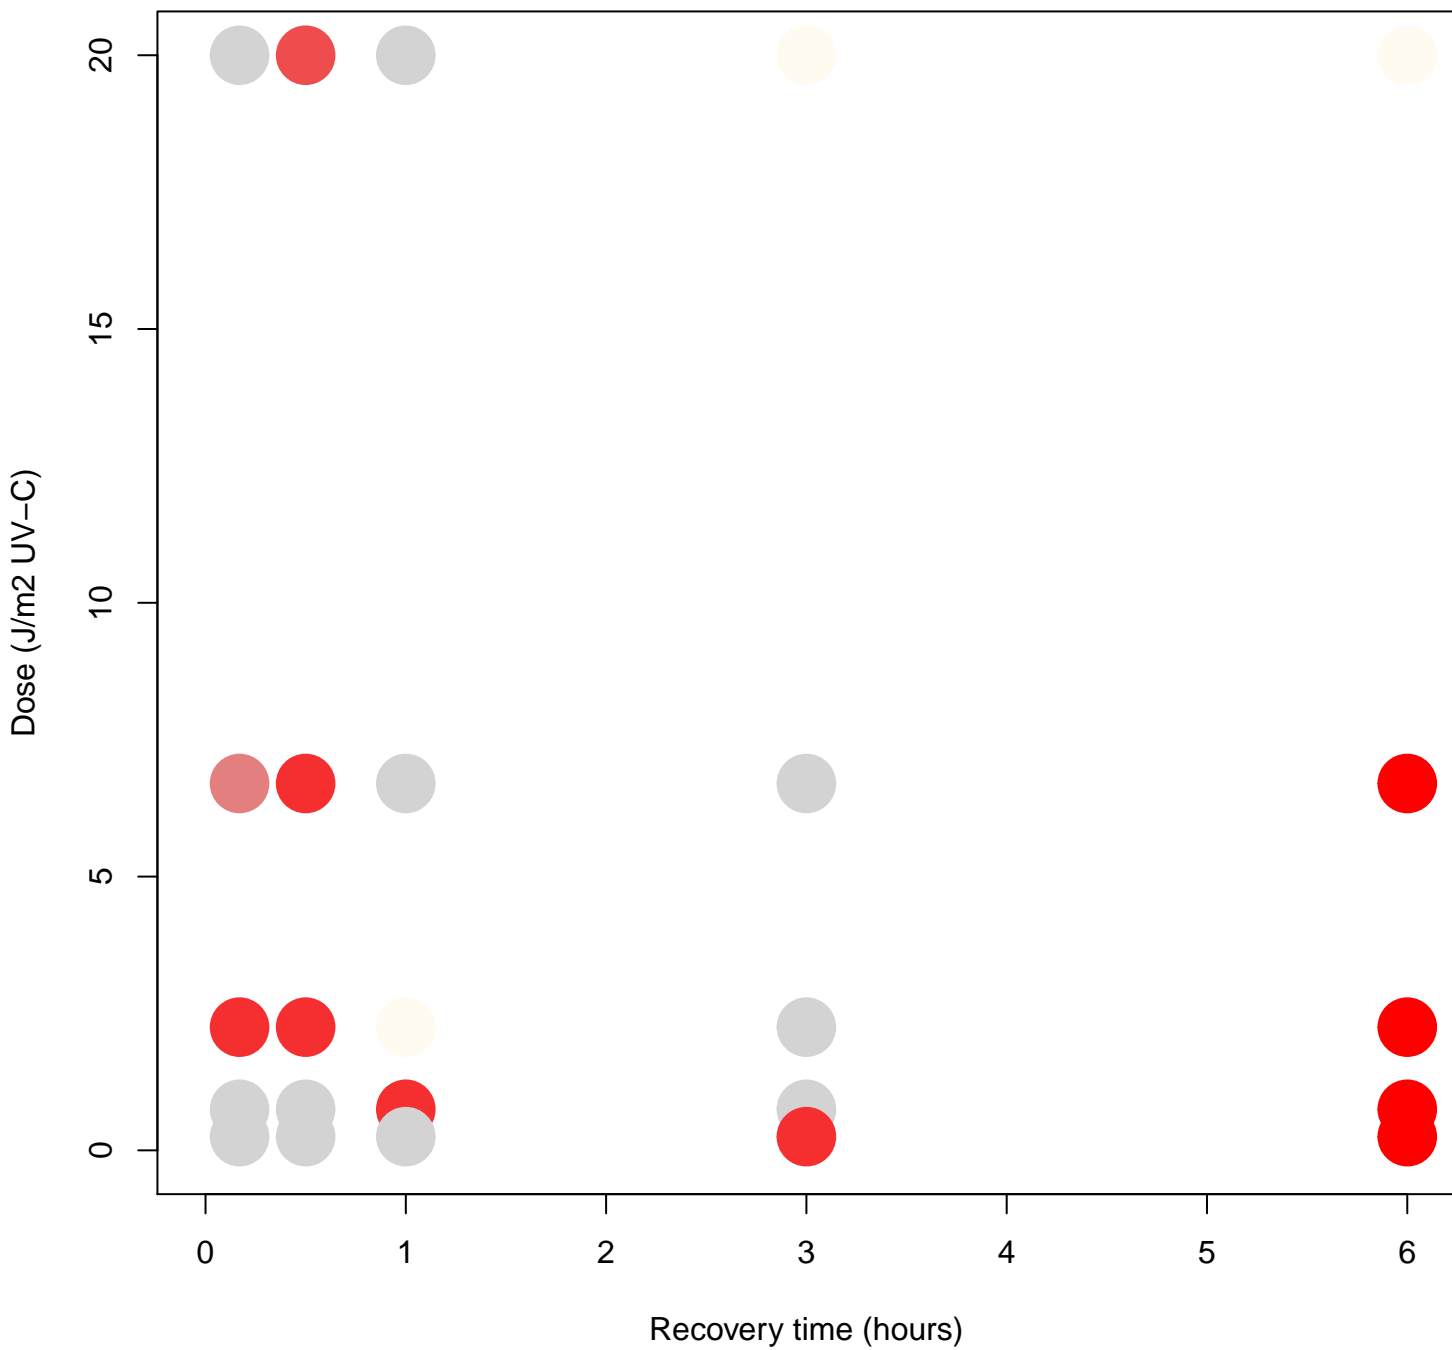

# BC\_mitochondria\_apoptosis\_GST\_vs\_0\_in\_time\_FDR

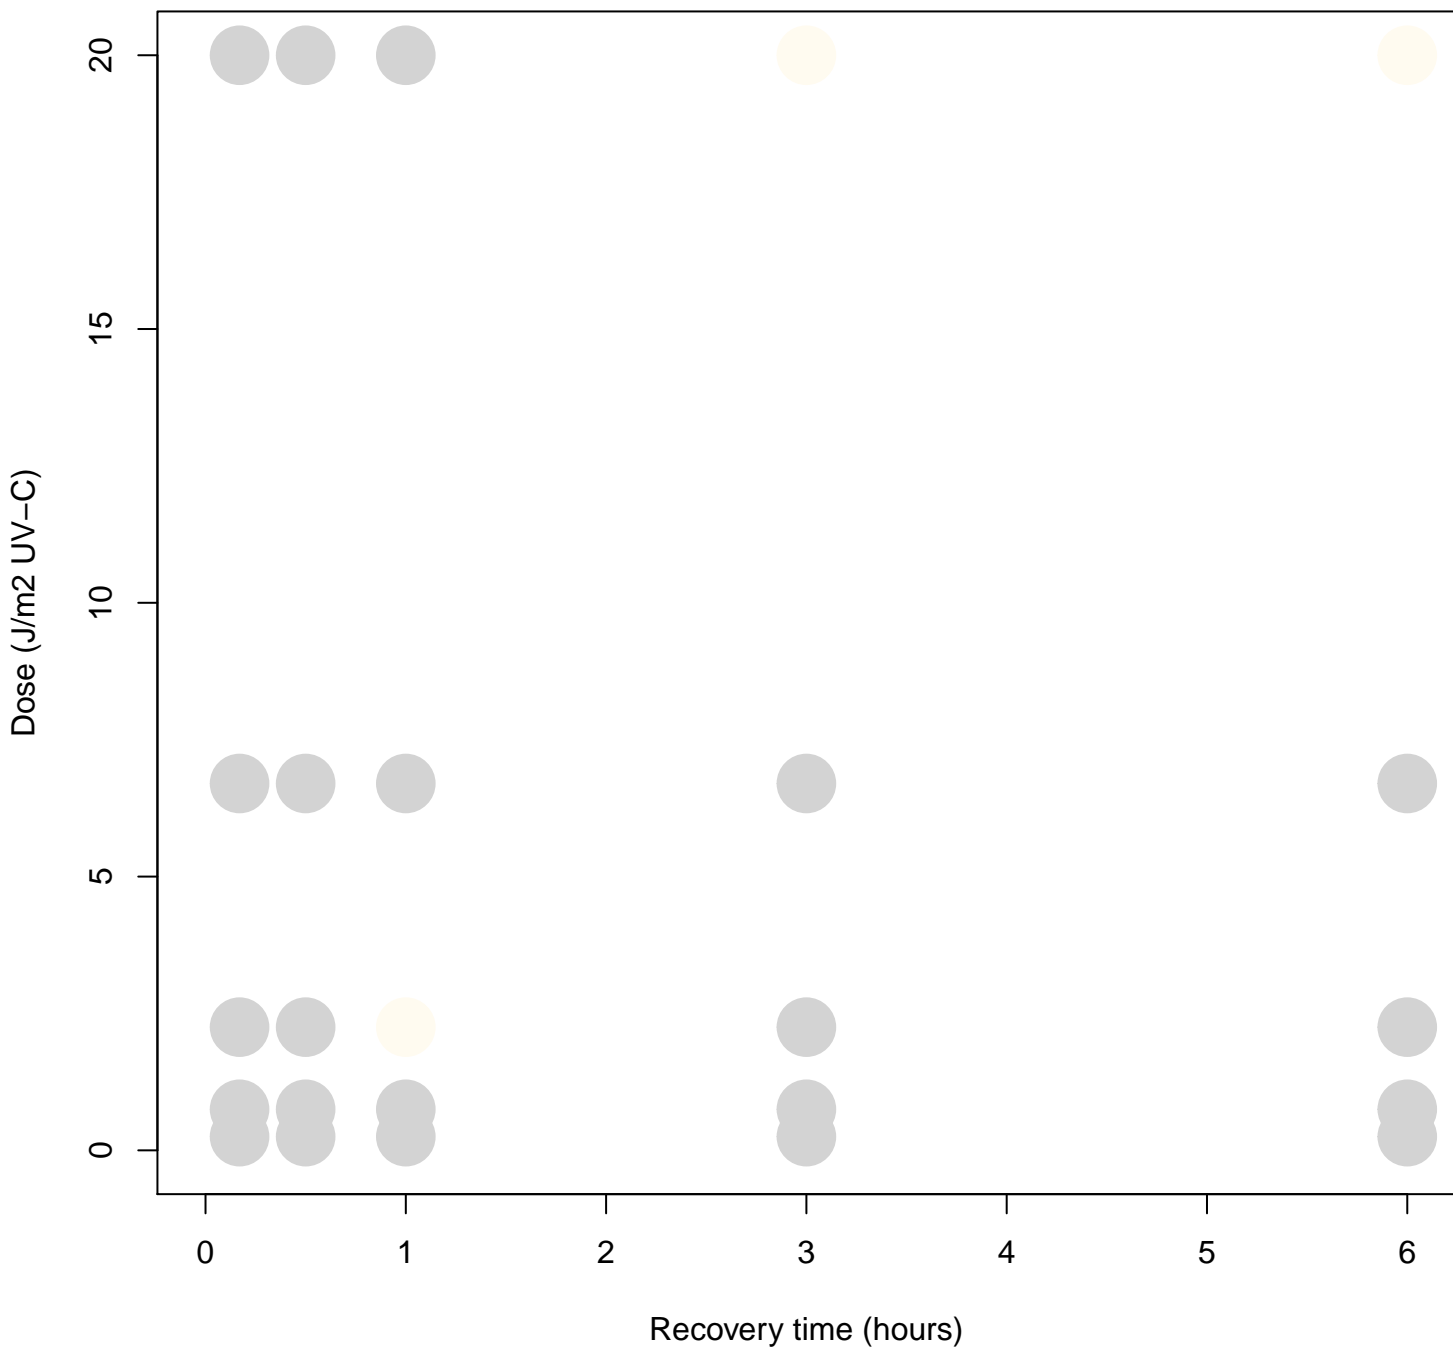

# BC\_p53\_signalling\_pathways\_GST\_vs\_0\_in\_time\_FDR

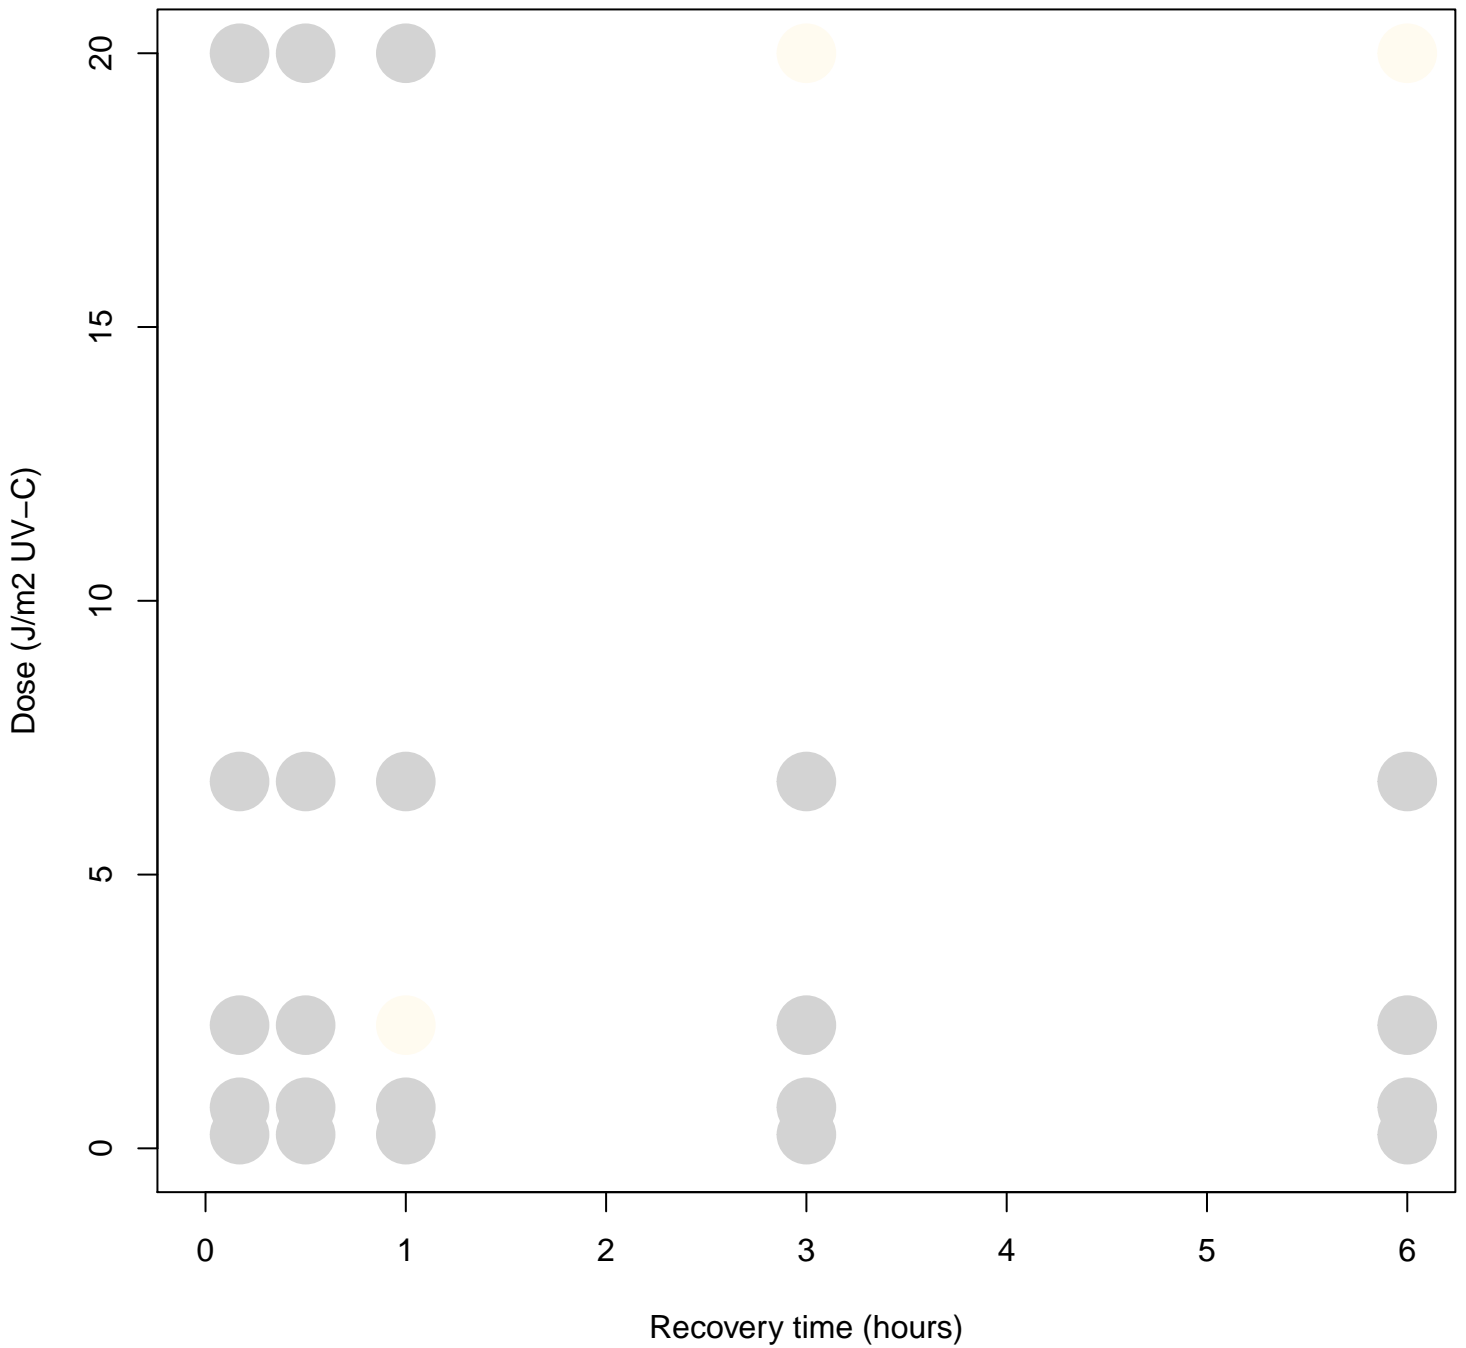

# IARC\_P53\_core\_regulatory\_network\_GST\_vs\_0\_in\_time\_FDR

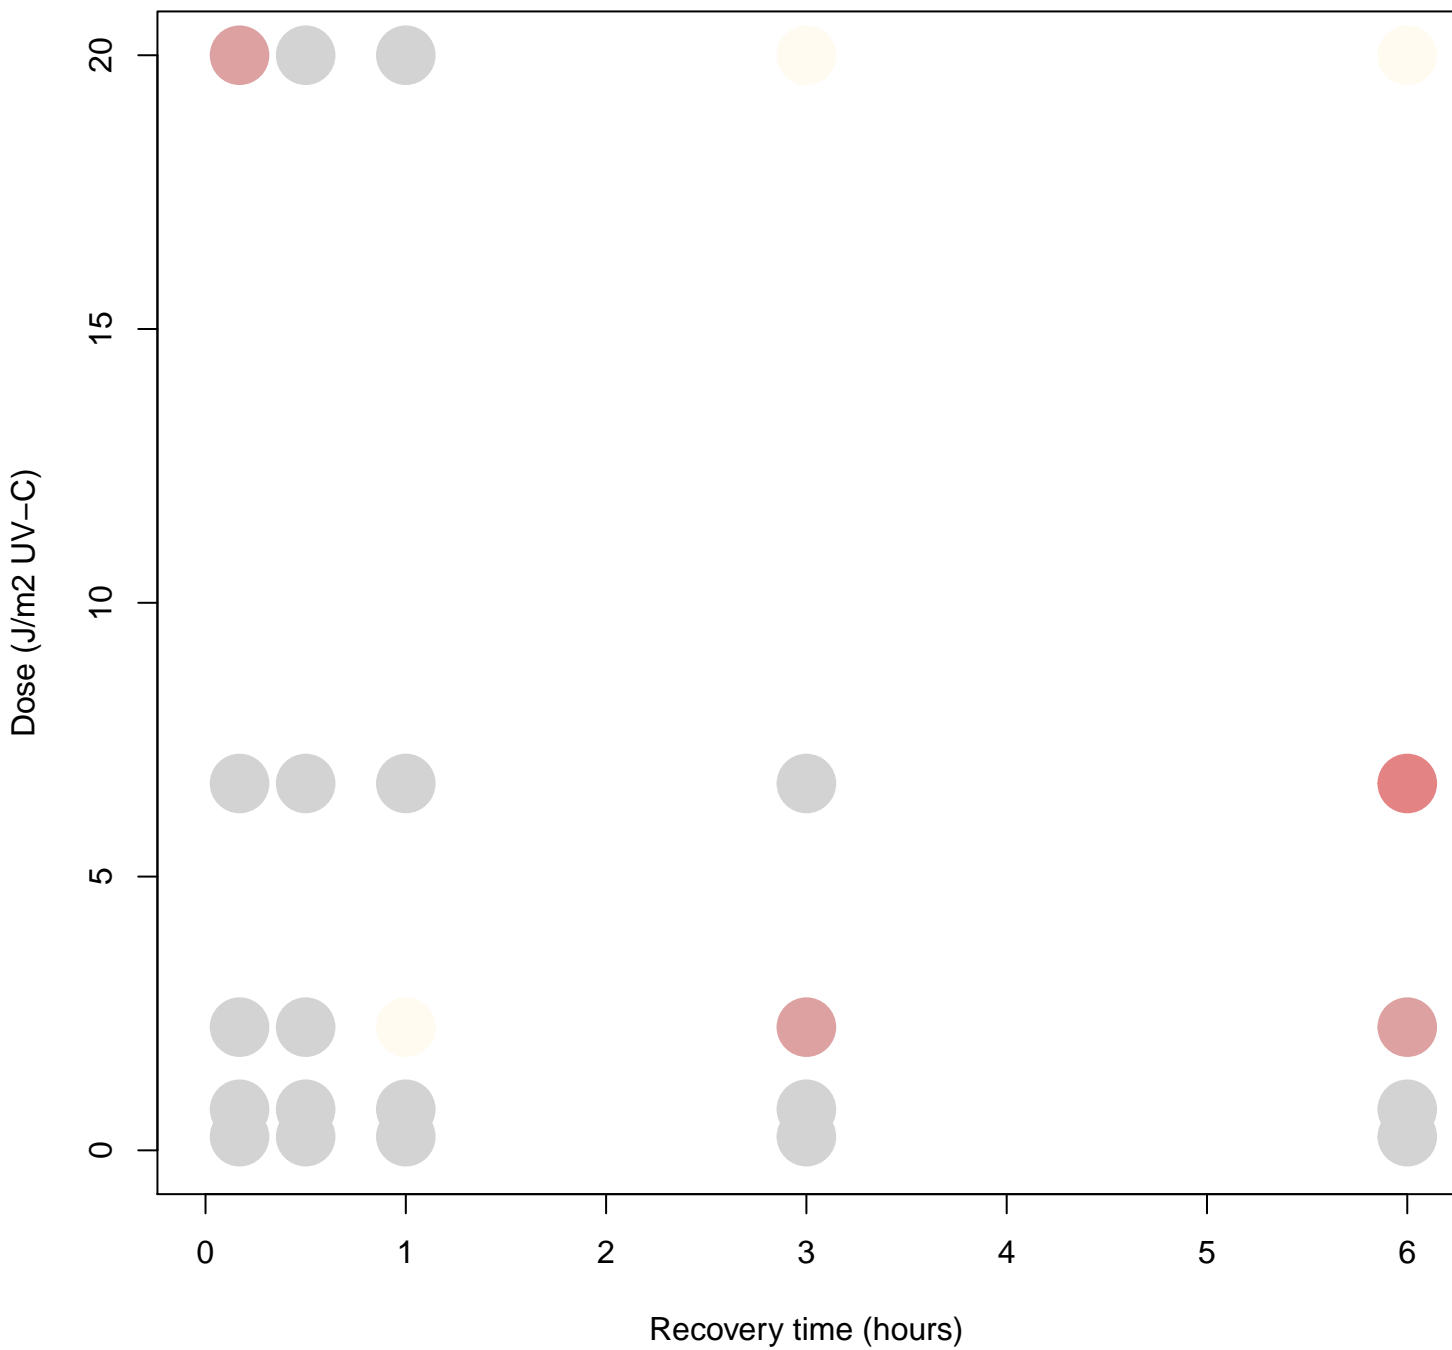

# IARC\_p53\_Downstream\_target\_genes\_GST\_vs\_0\_in\_time\_FDR

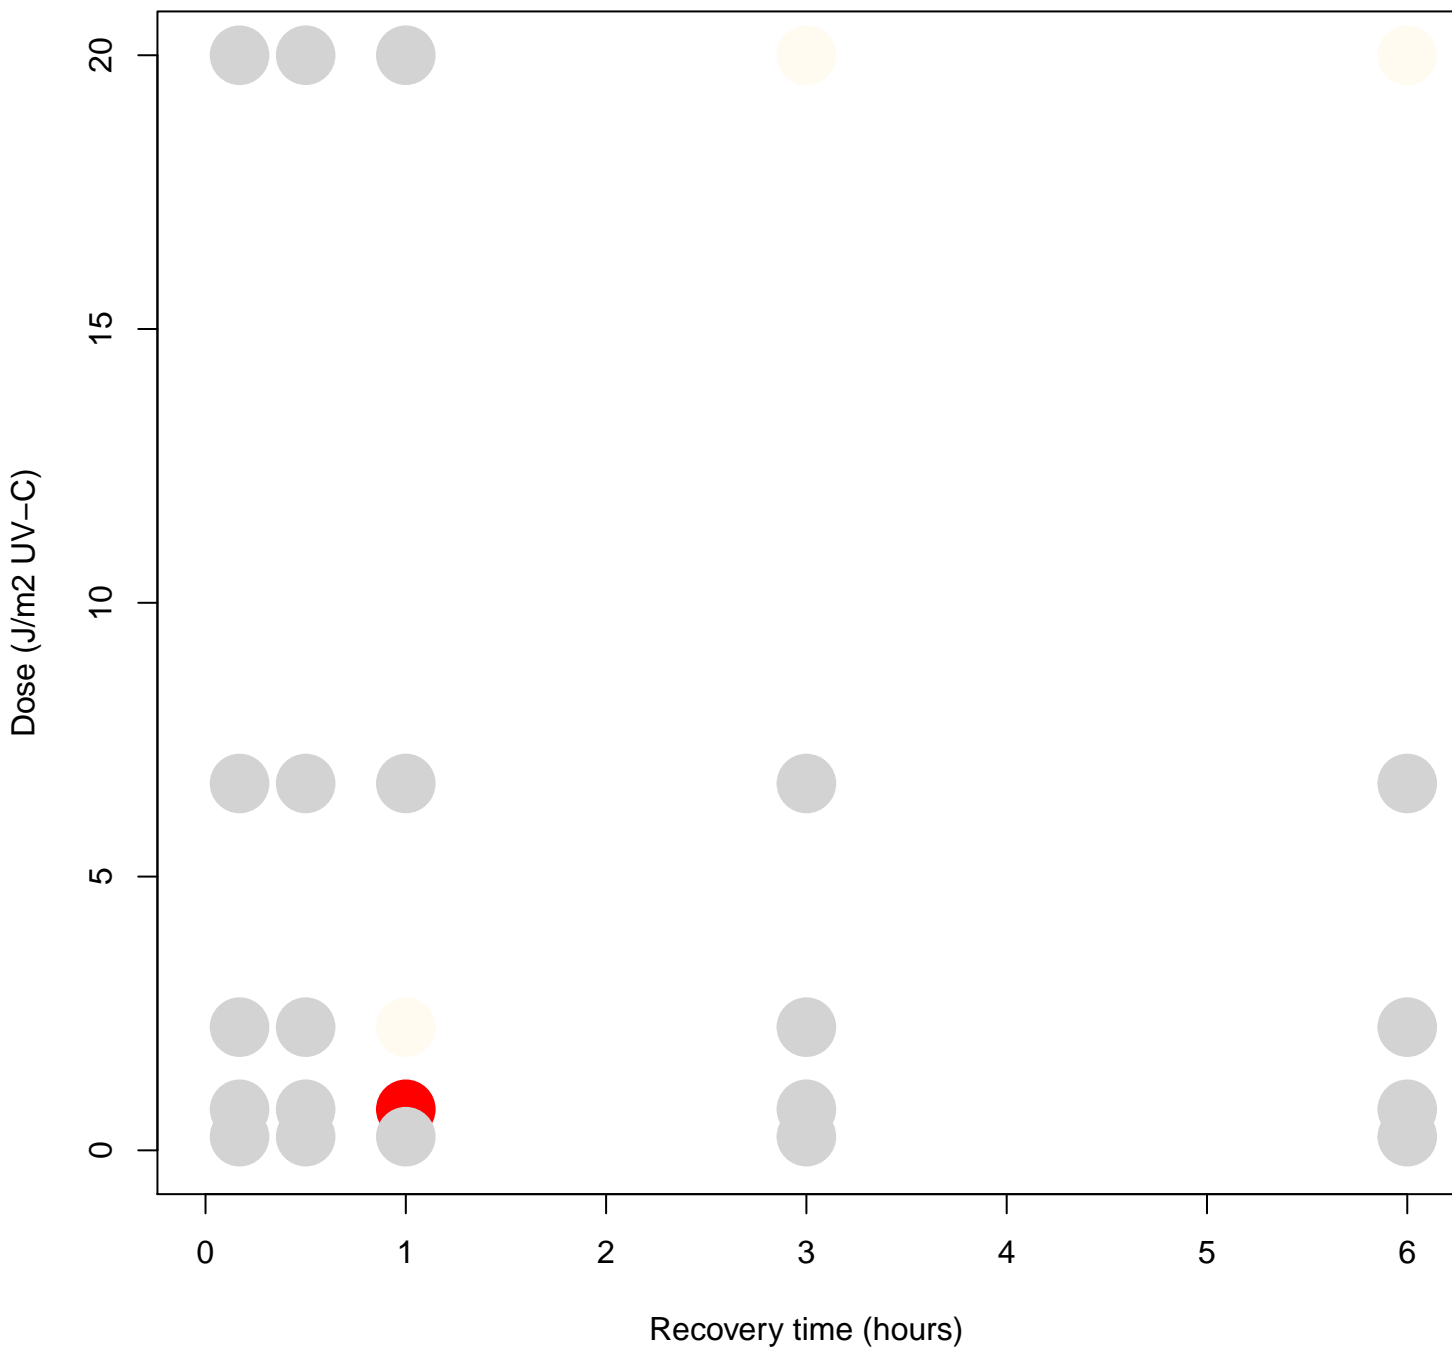

# IARC\_p53.RE\_name\_GST\_vs\_0\_in\_time\_FDR

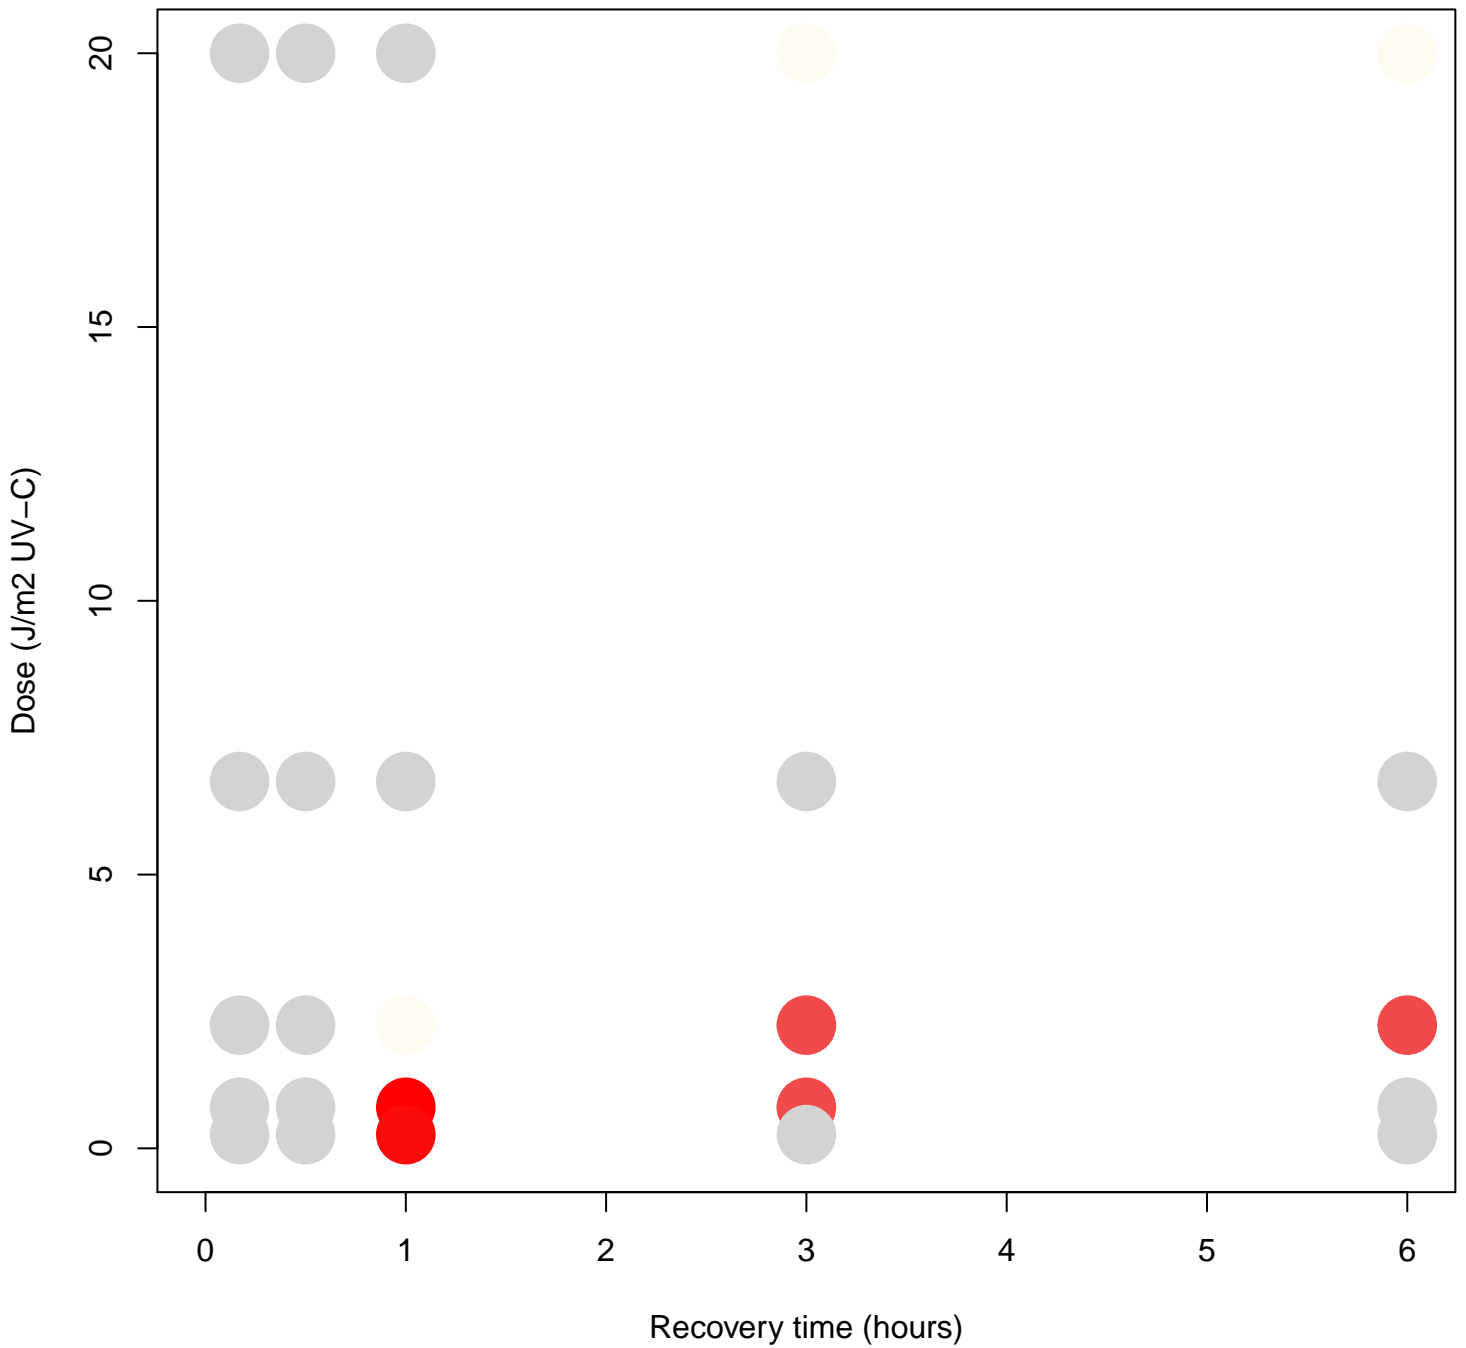

# KEGG\_3420\_Nucleotide\_excision\_repair\_GST\_vs\_0\_in\_time\_FDR

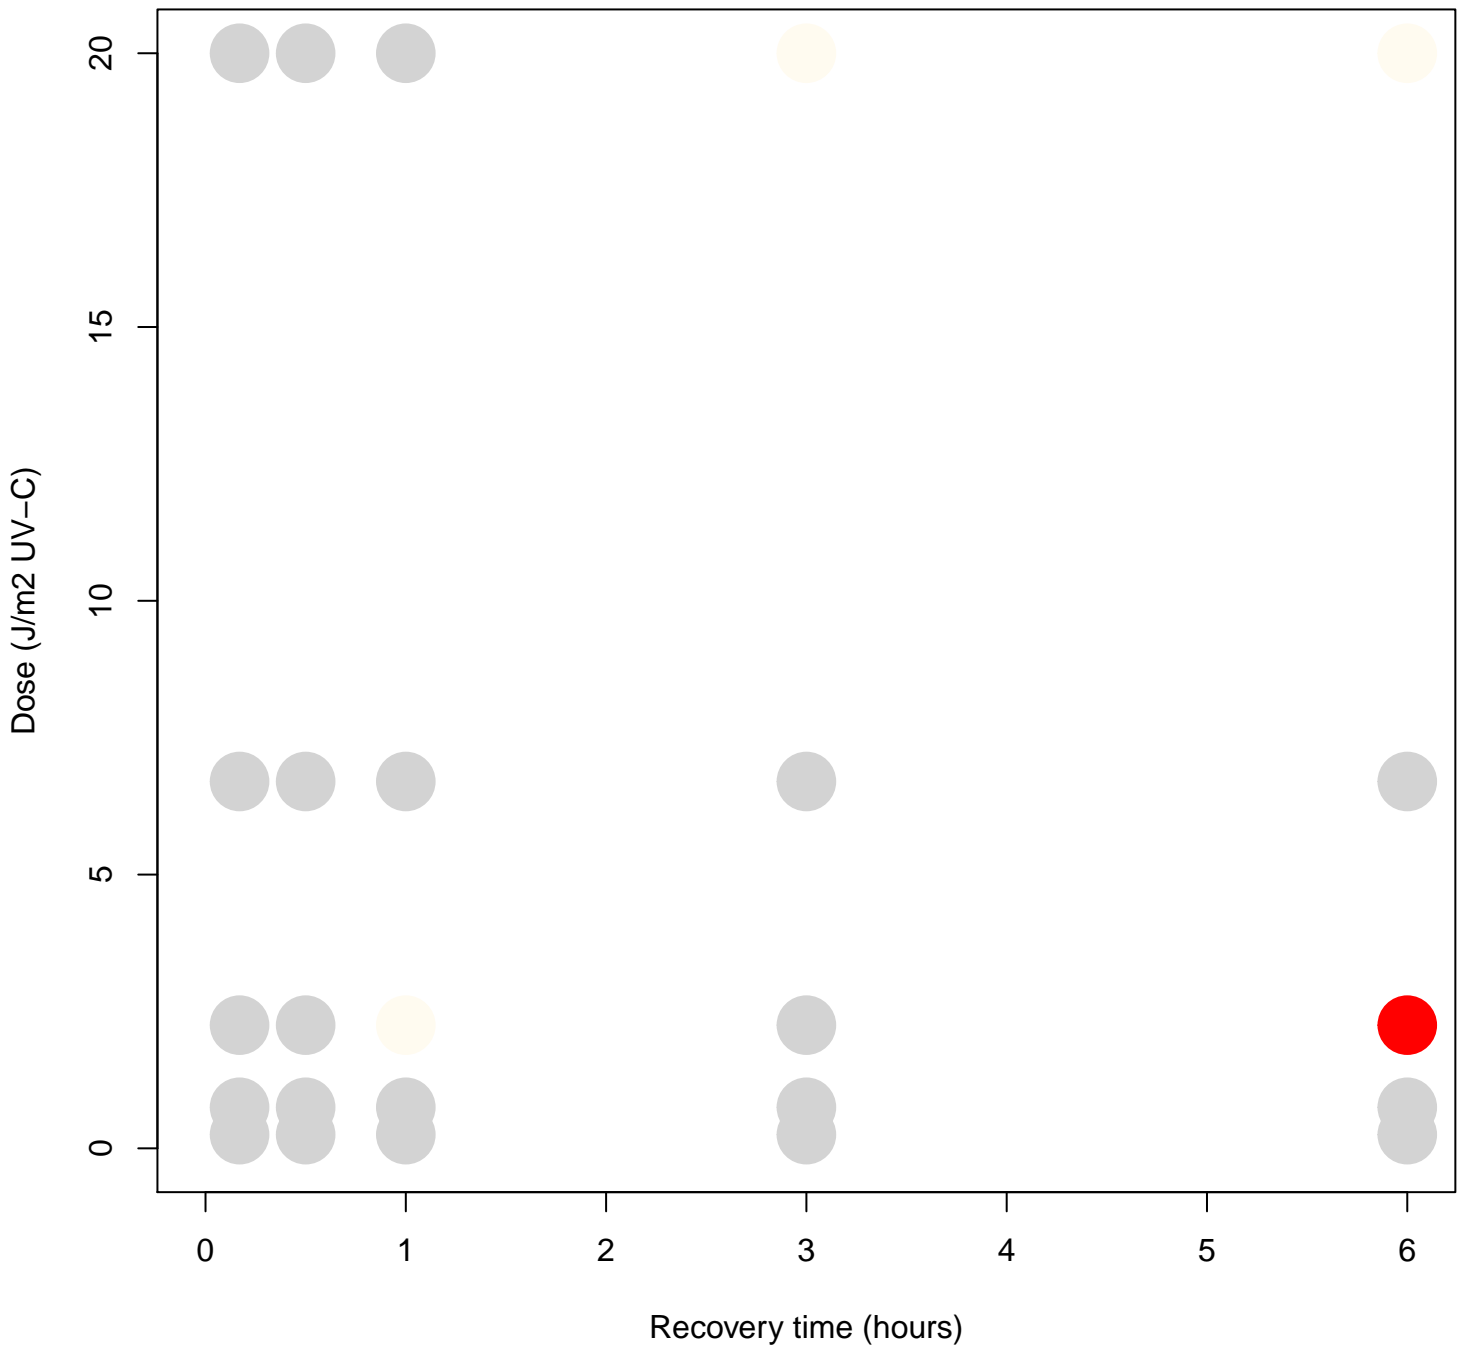

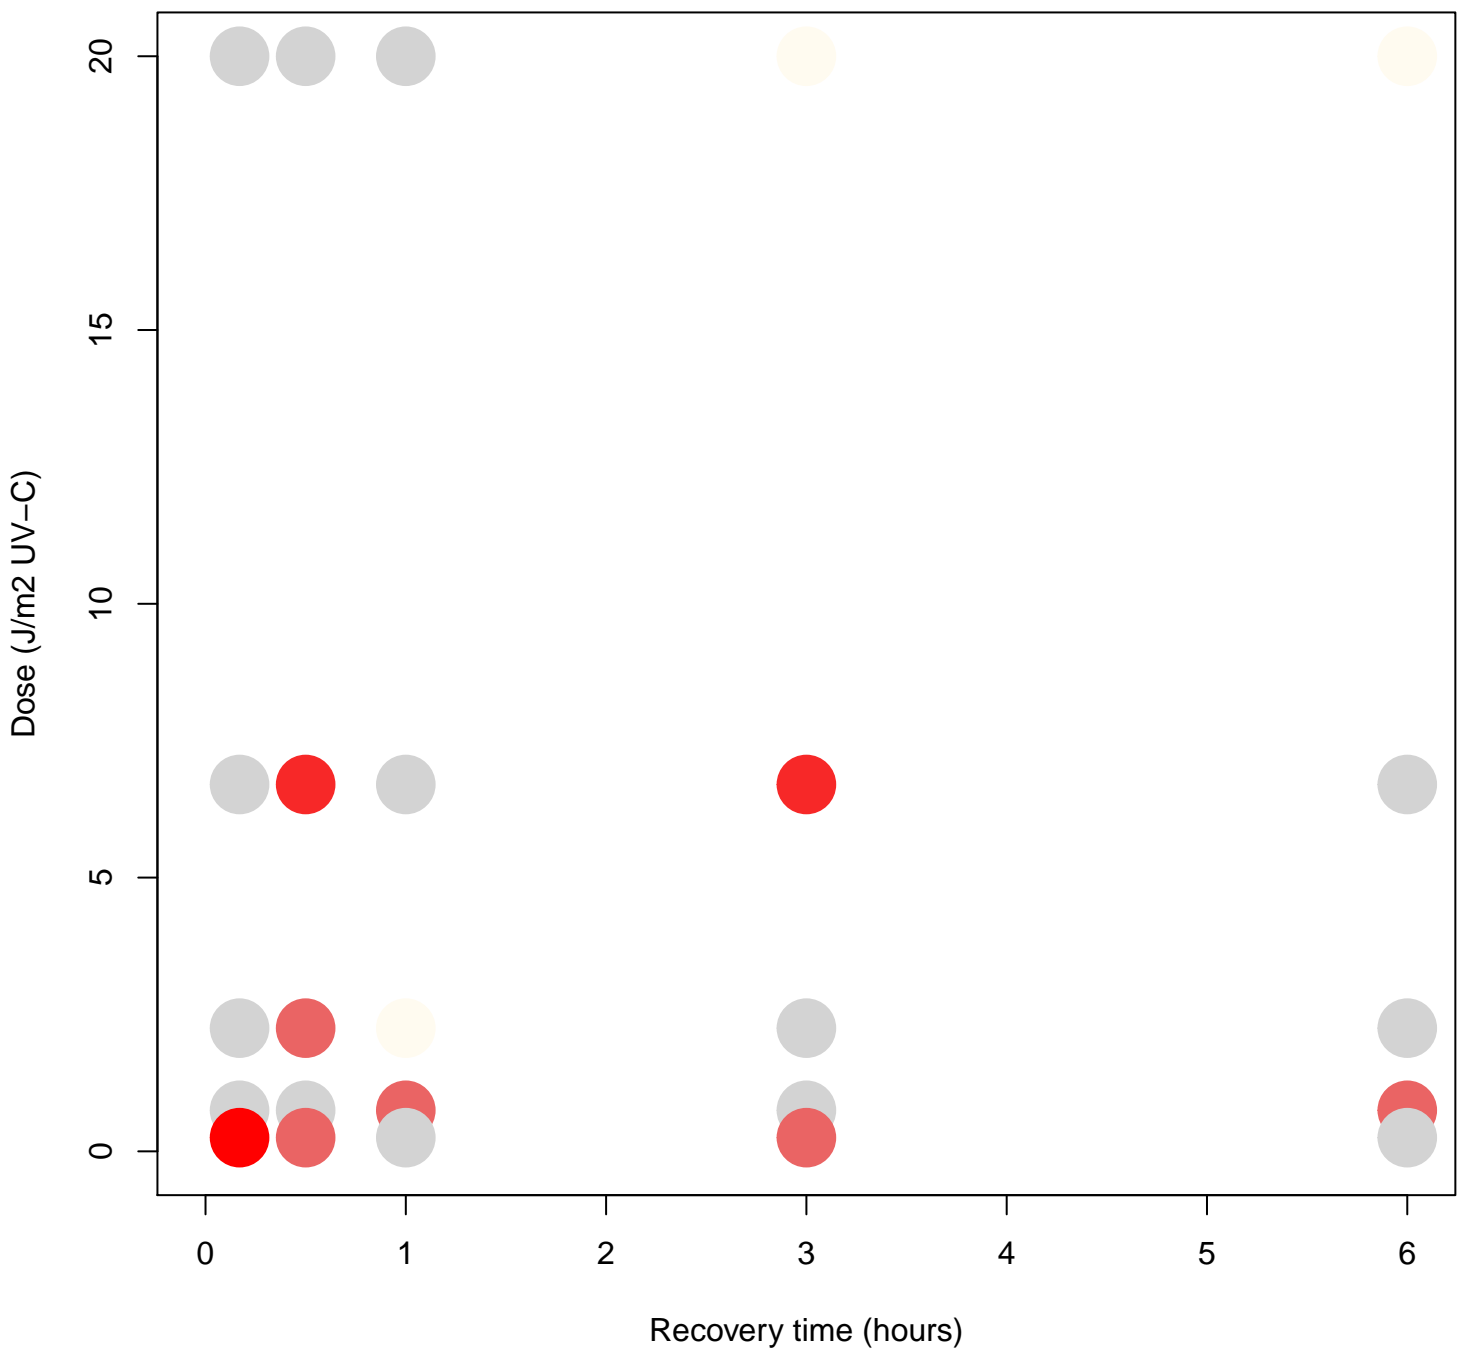



# MC\_maps\_apoptosis\_and\_survival\_p53\_dependent\_apoptosis\_GST\_vs\_0\_in\_time\_F

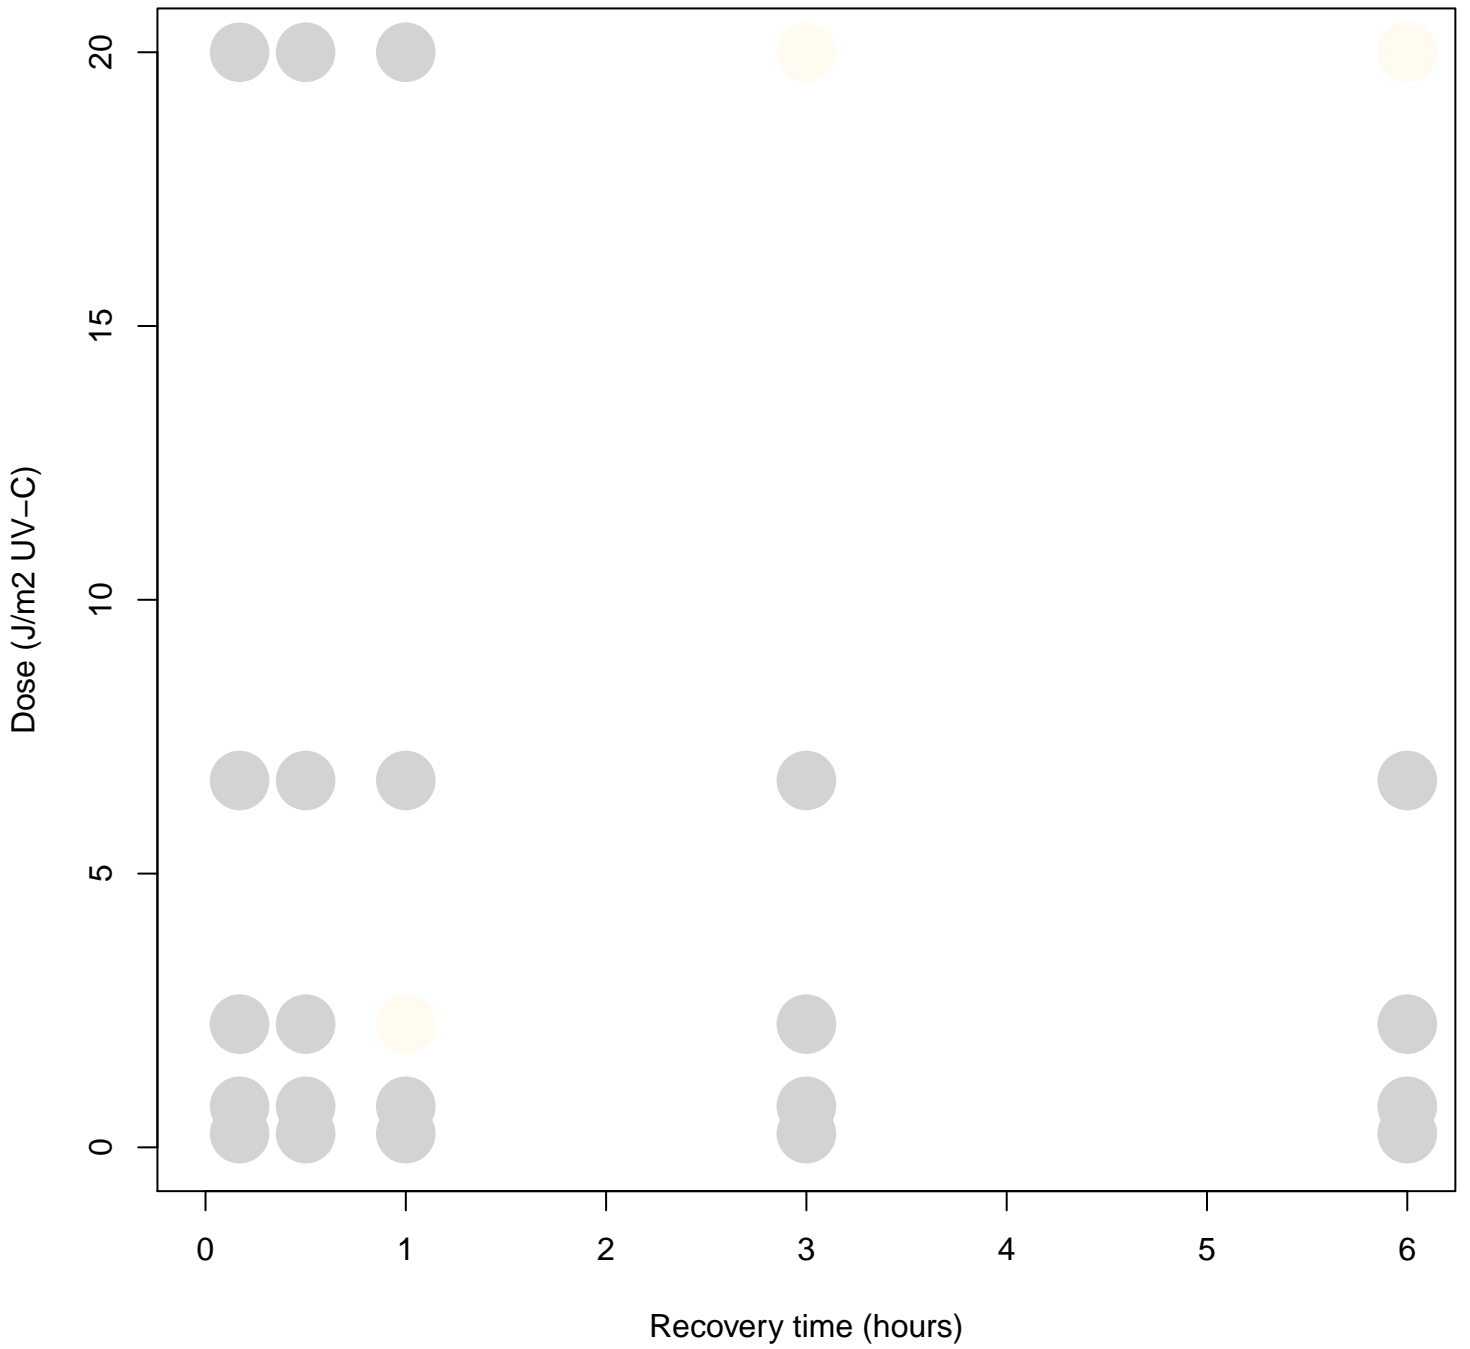

# MC\_maps\_ATM\_ATR\_regulation\_of\_G1\_S\_checkpoint\_GST\_vs\_0\_in\_time\_FDR

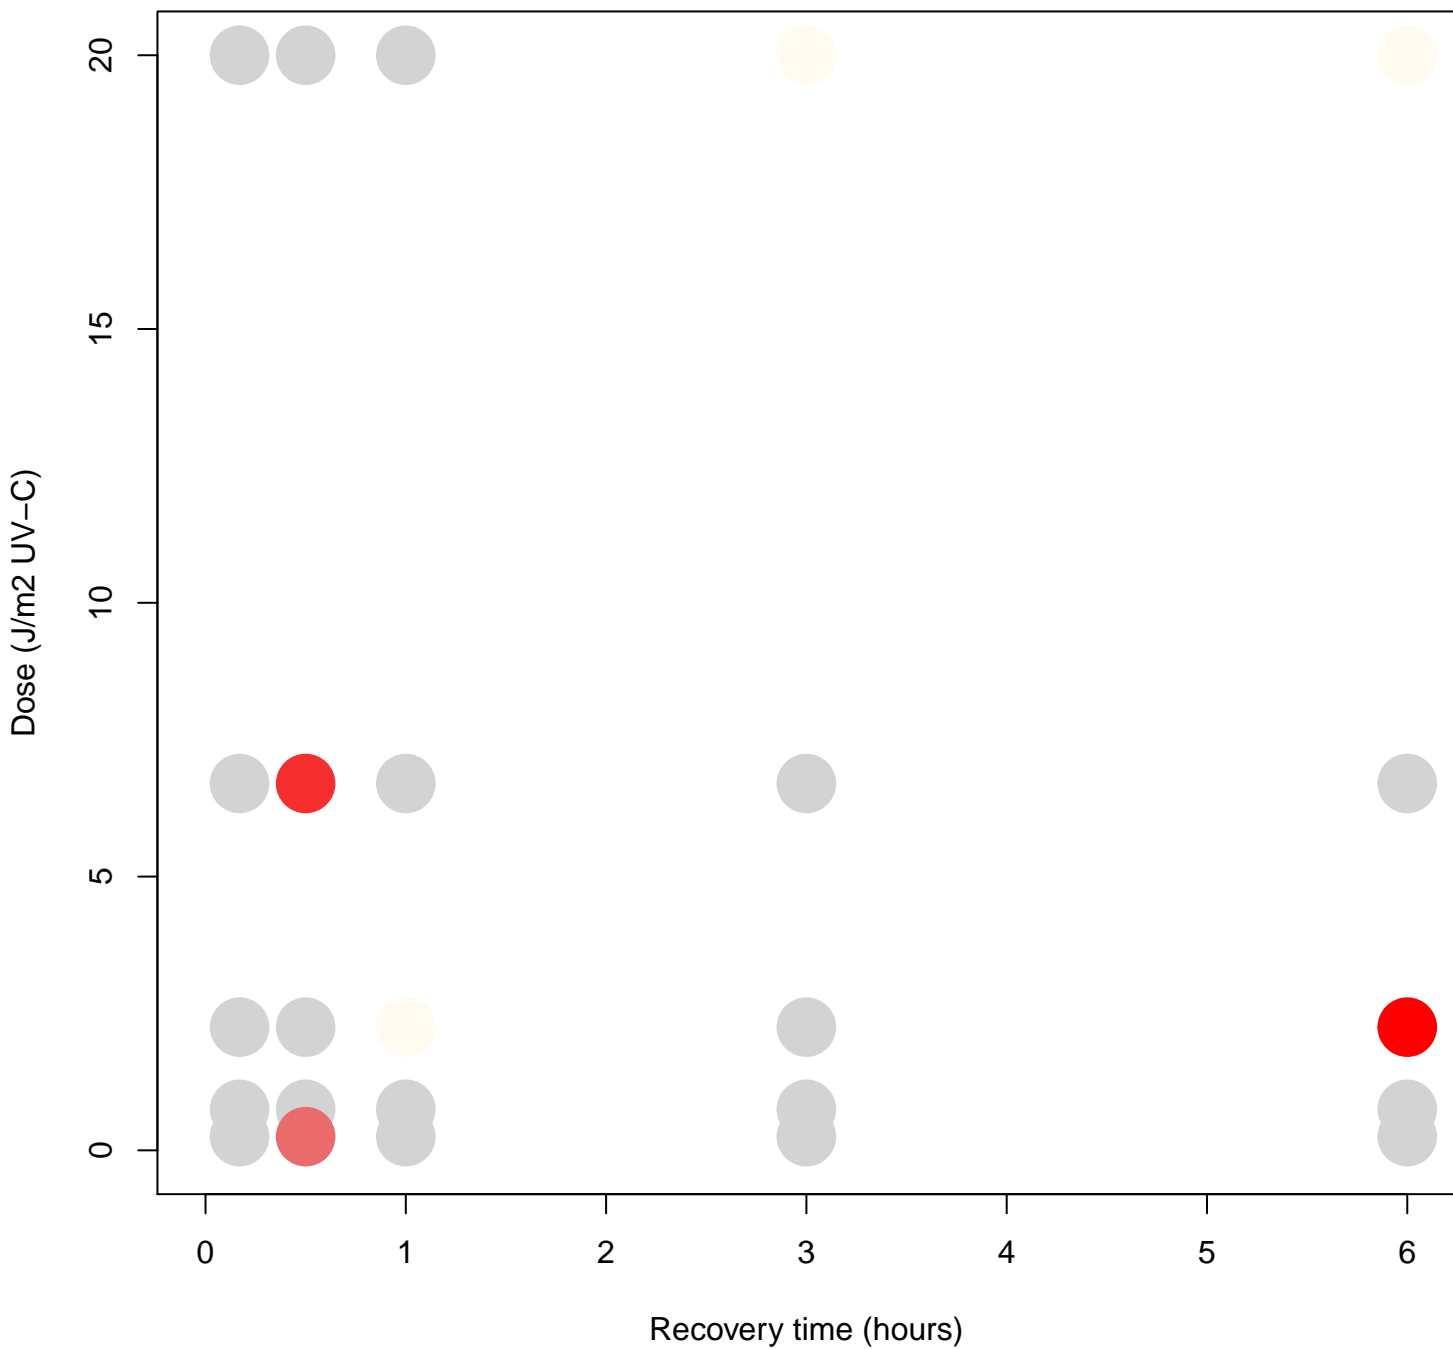

# MC\_maps\_ATM\_ATR\_regulation\_of\_G2\_M\_checkpoint\_GST\_vs\_0\_in\_time\_FDR

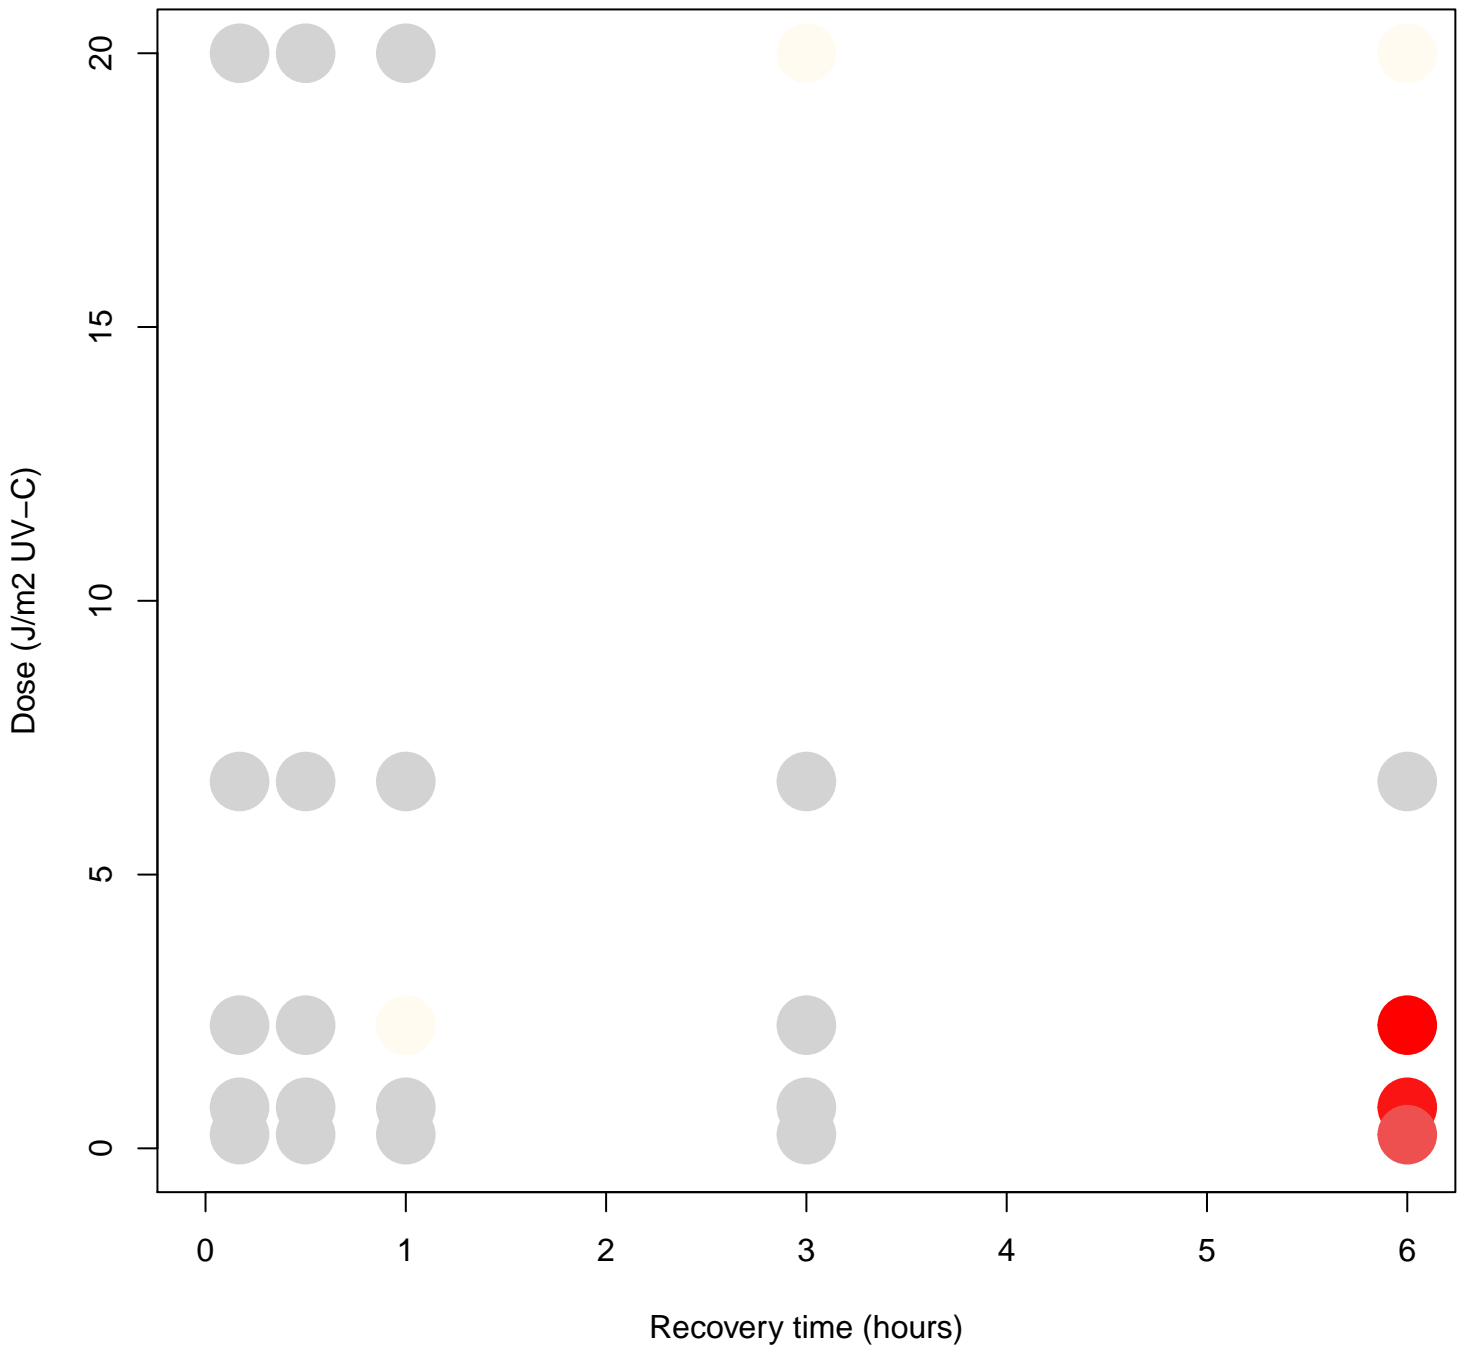

maps\_DNA\_damage\_ATM\_.ATR\_regulation\_of\_G2\_.M\_checkpoint\_GST\_vs\_0\_in\_tir

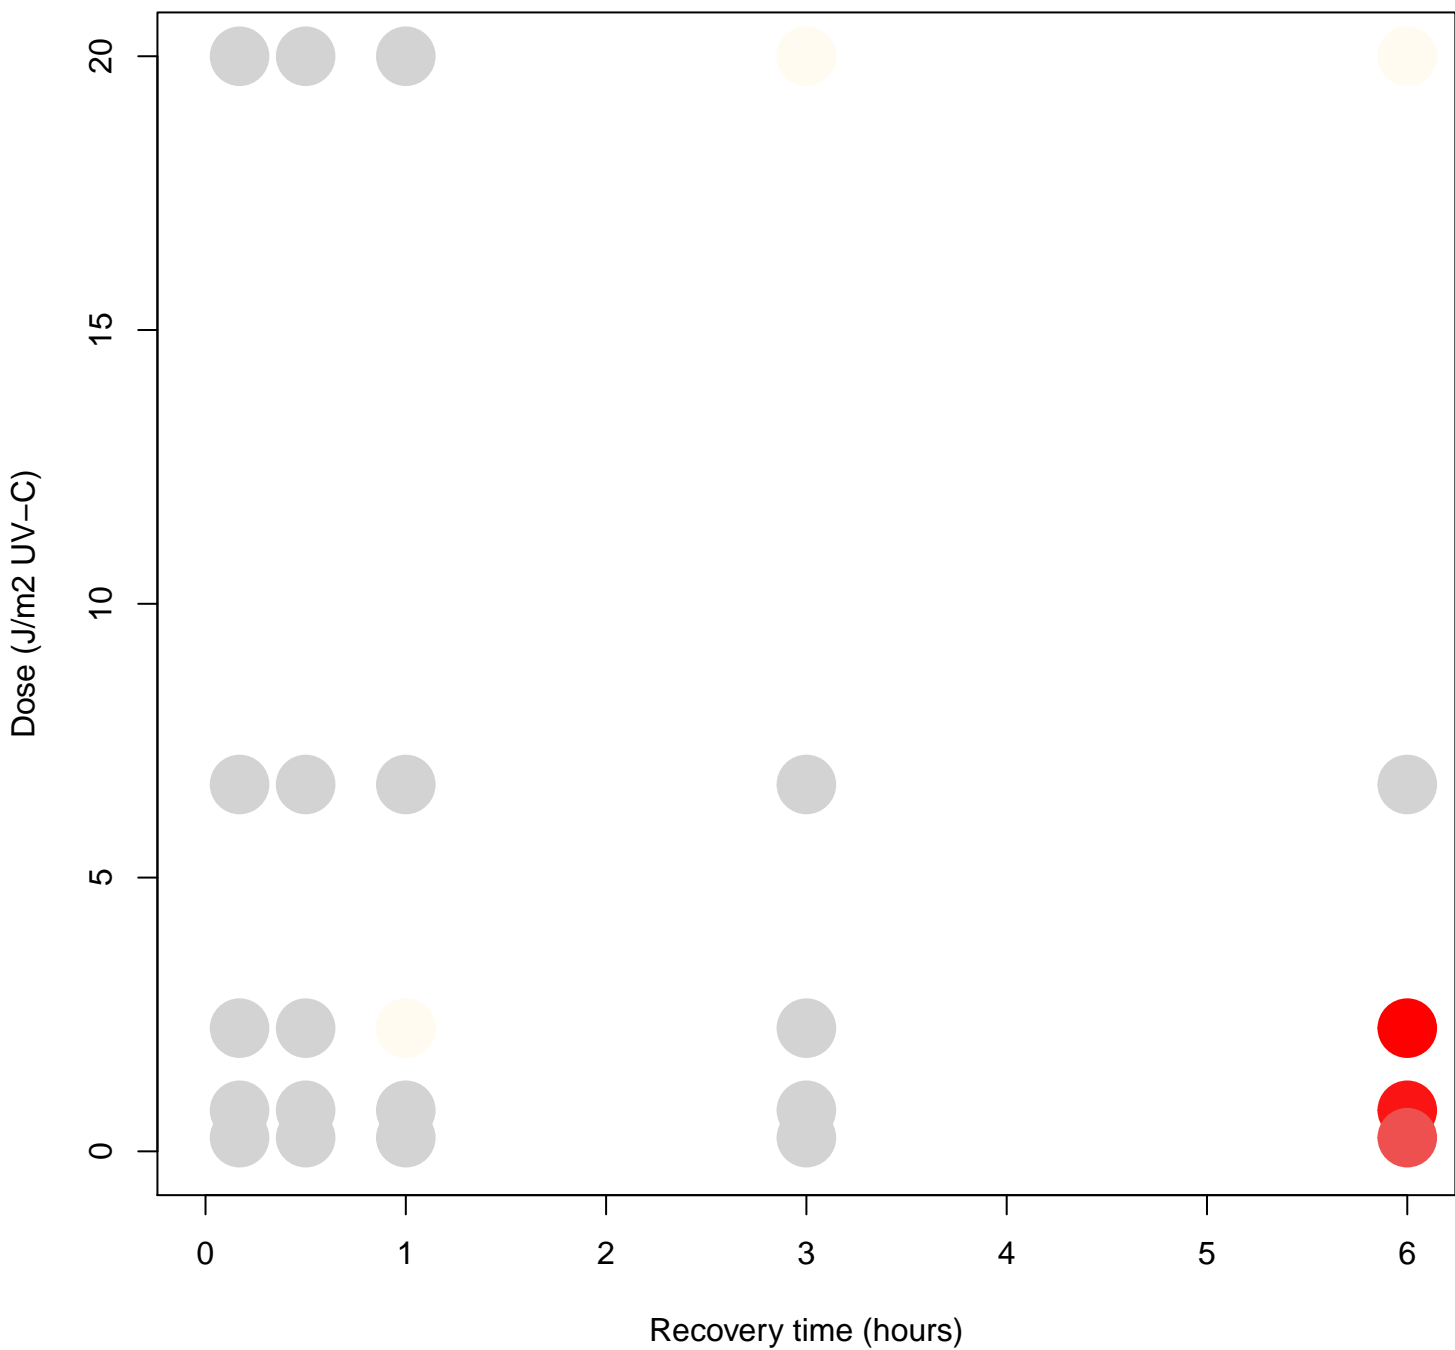

# MC\_maps\_DNA\_damage\_induced\_response\_GST\_vs\_0\_in\_time\_FDR

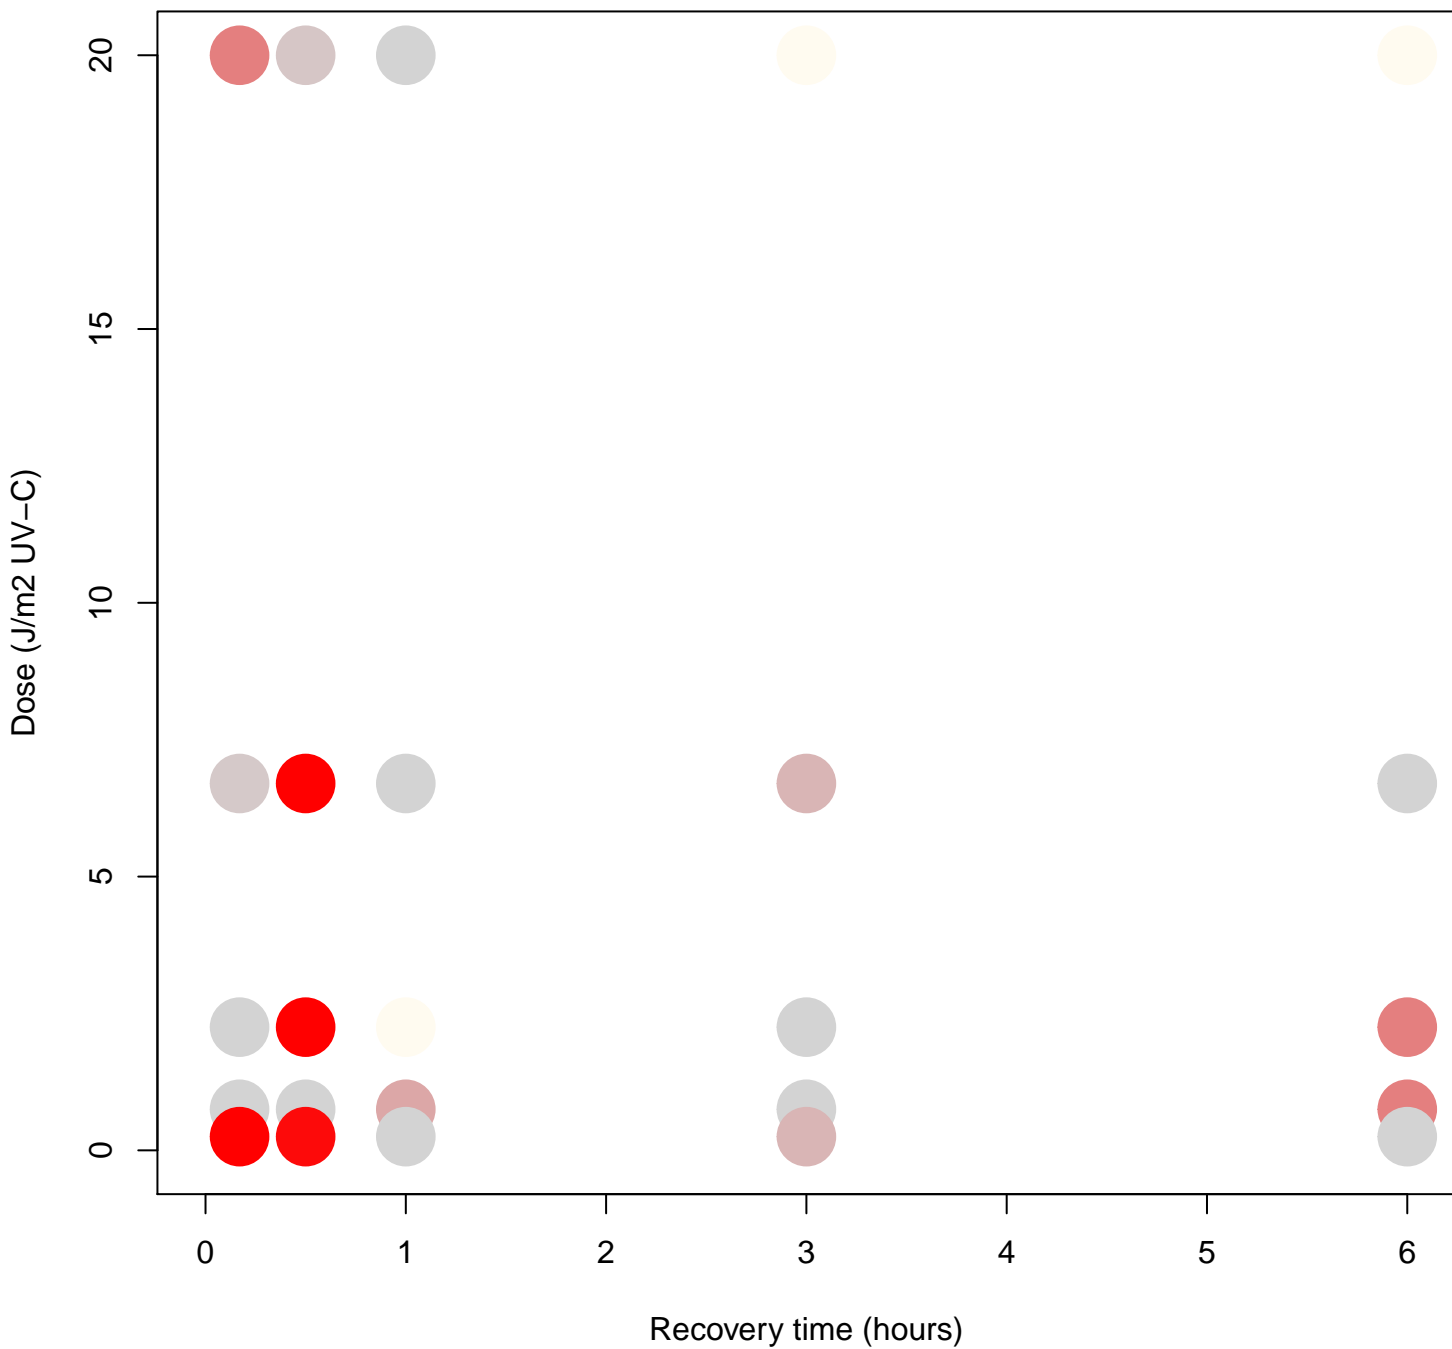

# MC\_maps\_DNA\_damage\_role\_SUMO\_in\_p53\_regulation\_GST\_vs\_0\_in\_time\_FDR

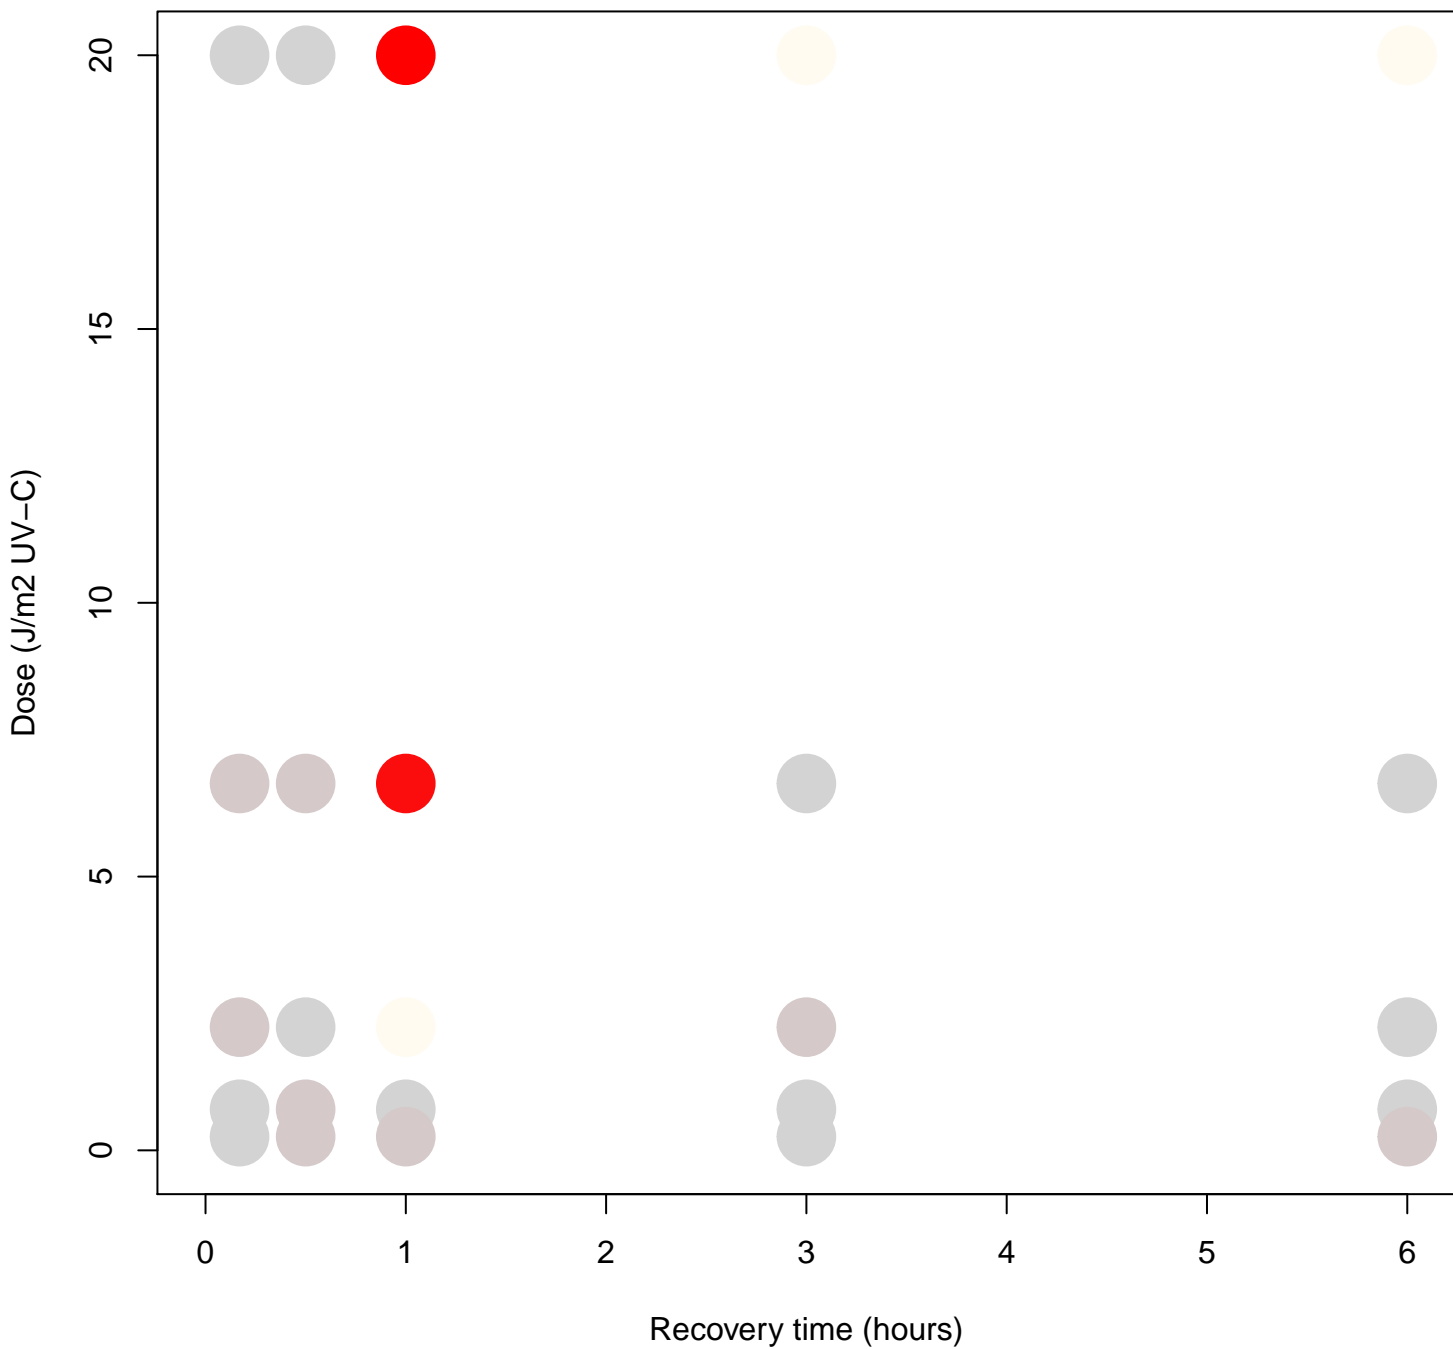

# MC\_maps\_NER\_GST\_vs\_0\_in\_time\_FDR

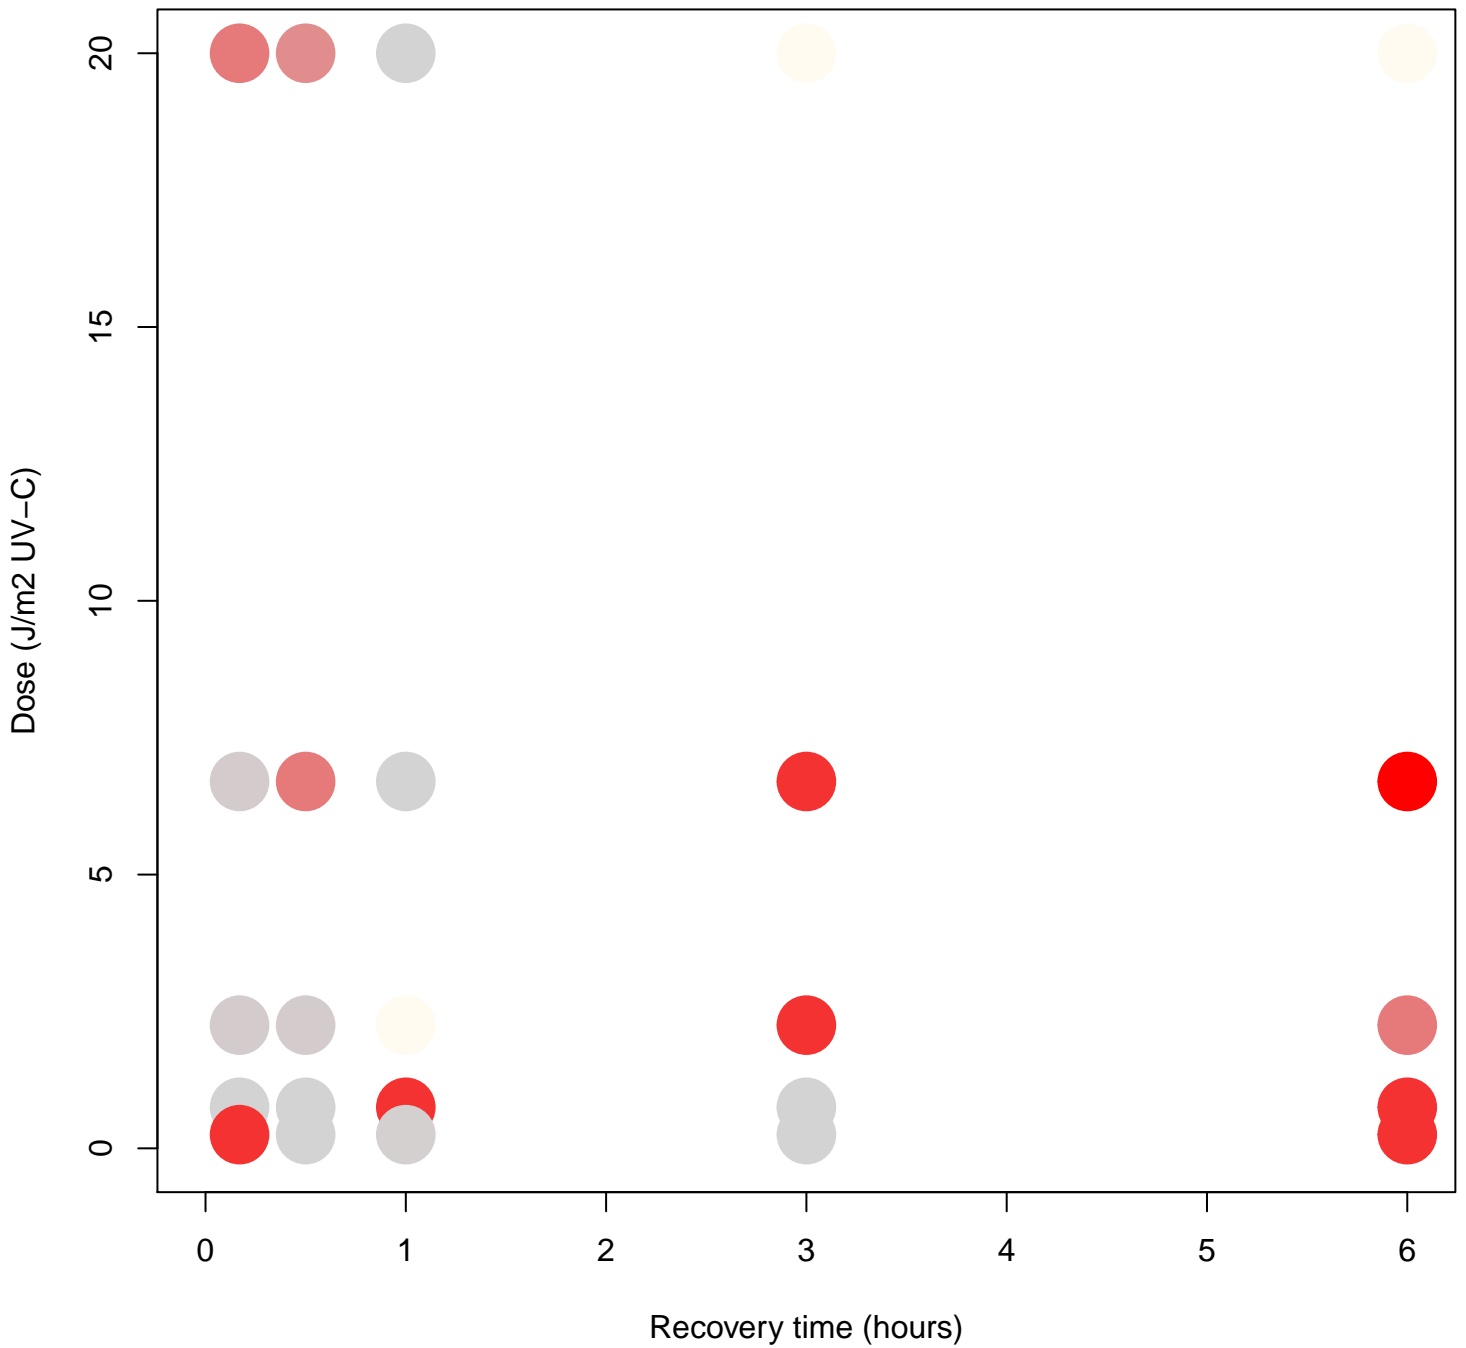

# Mcmaps\_regulation\_apoptosis\_mitochondrial\_proteins\_GST\_vs\_0\_in\_time\_FDR

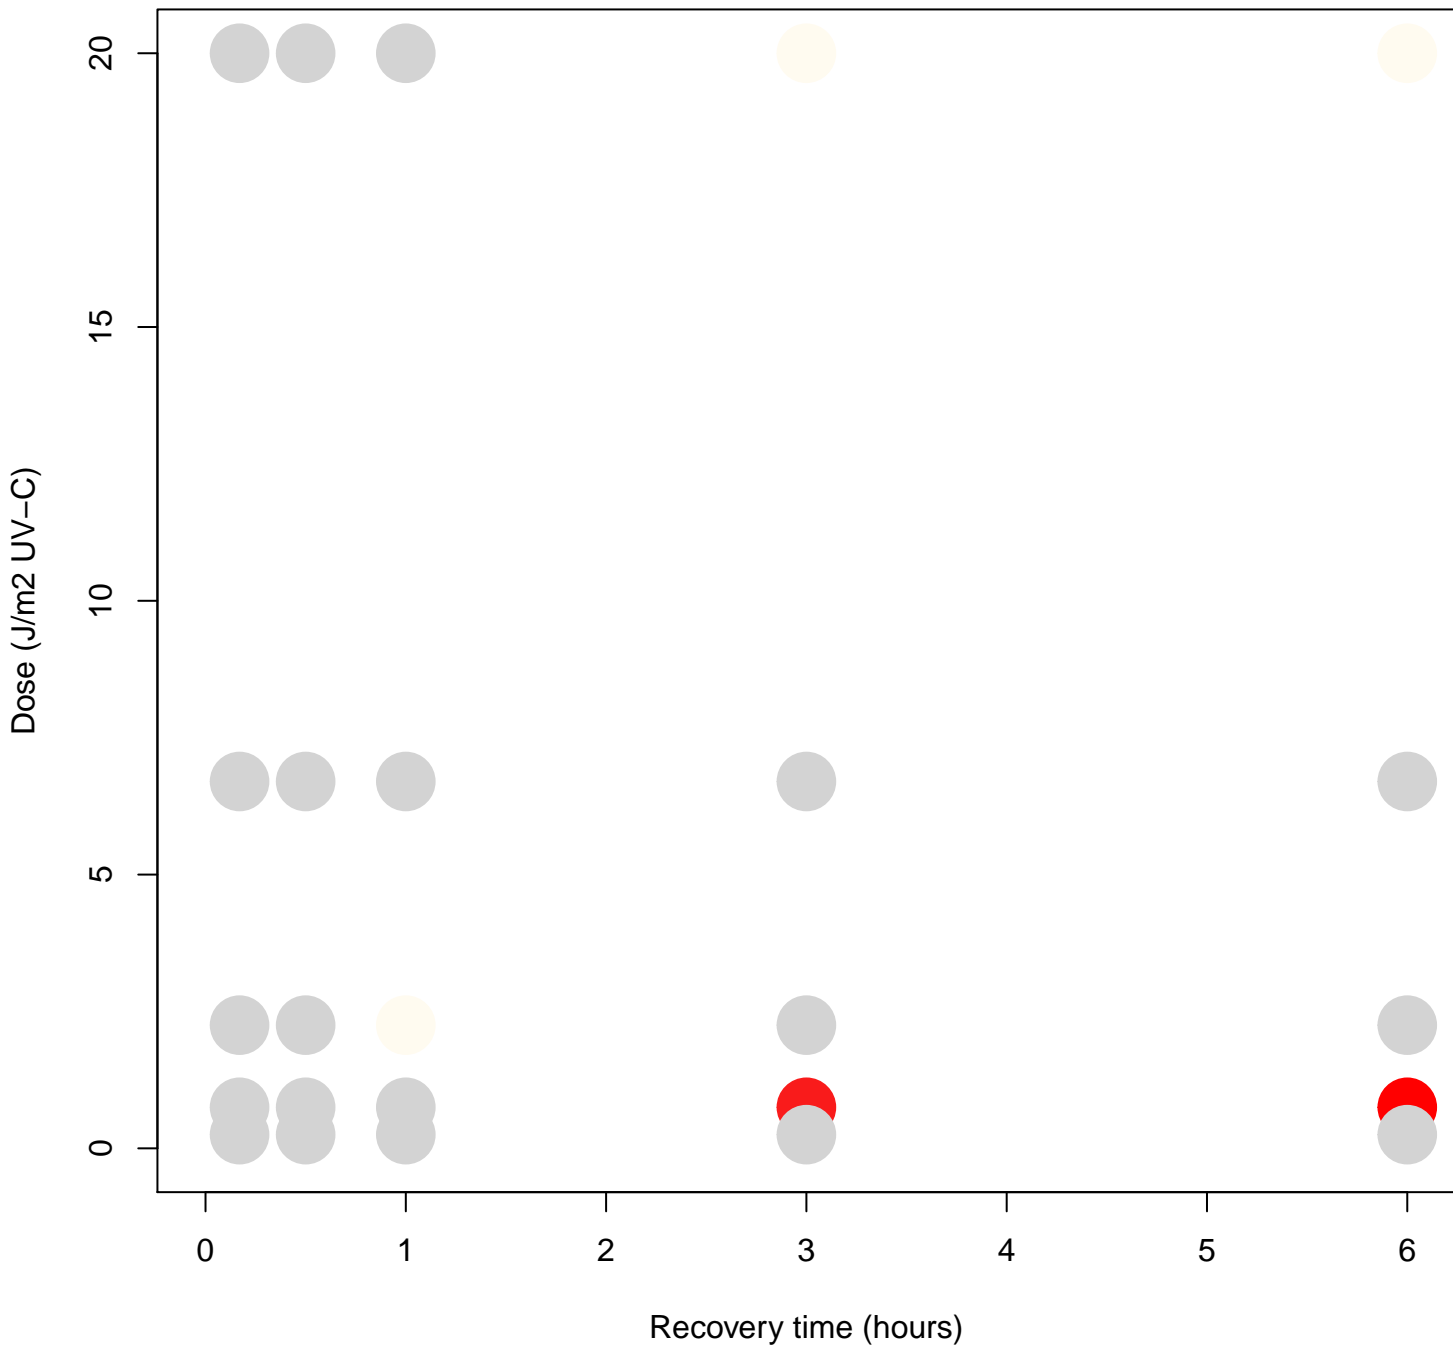



# Mcmaps\_regulation\_apoptosis\_mitochondrial\_proteins.1\_GST\_vs\_0\_in\_time\_FDR

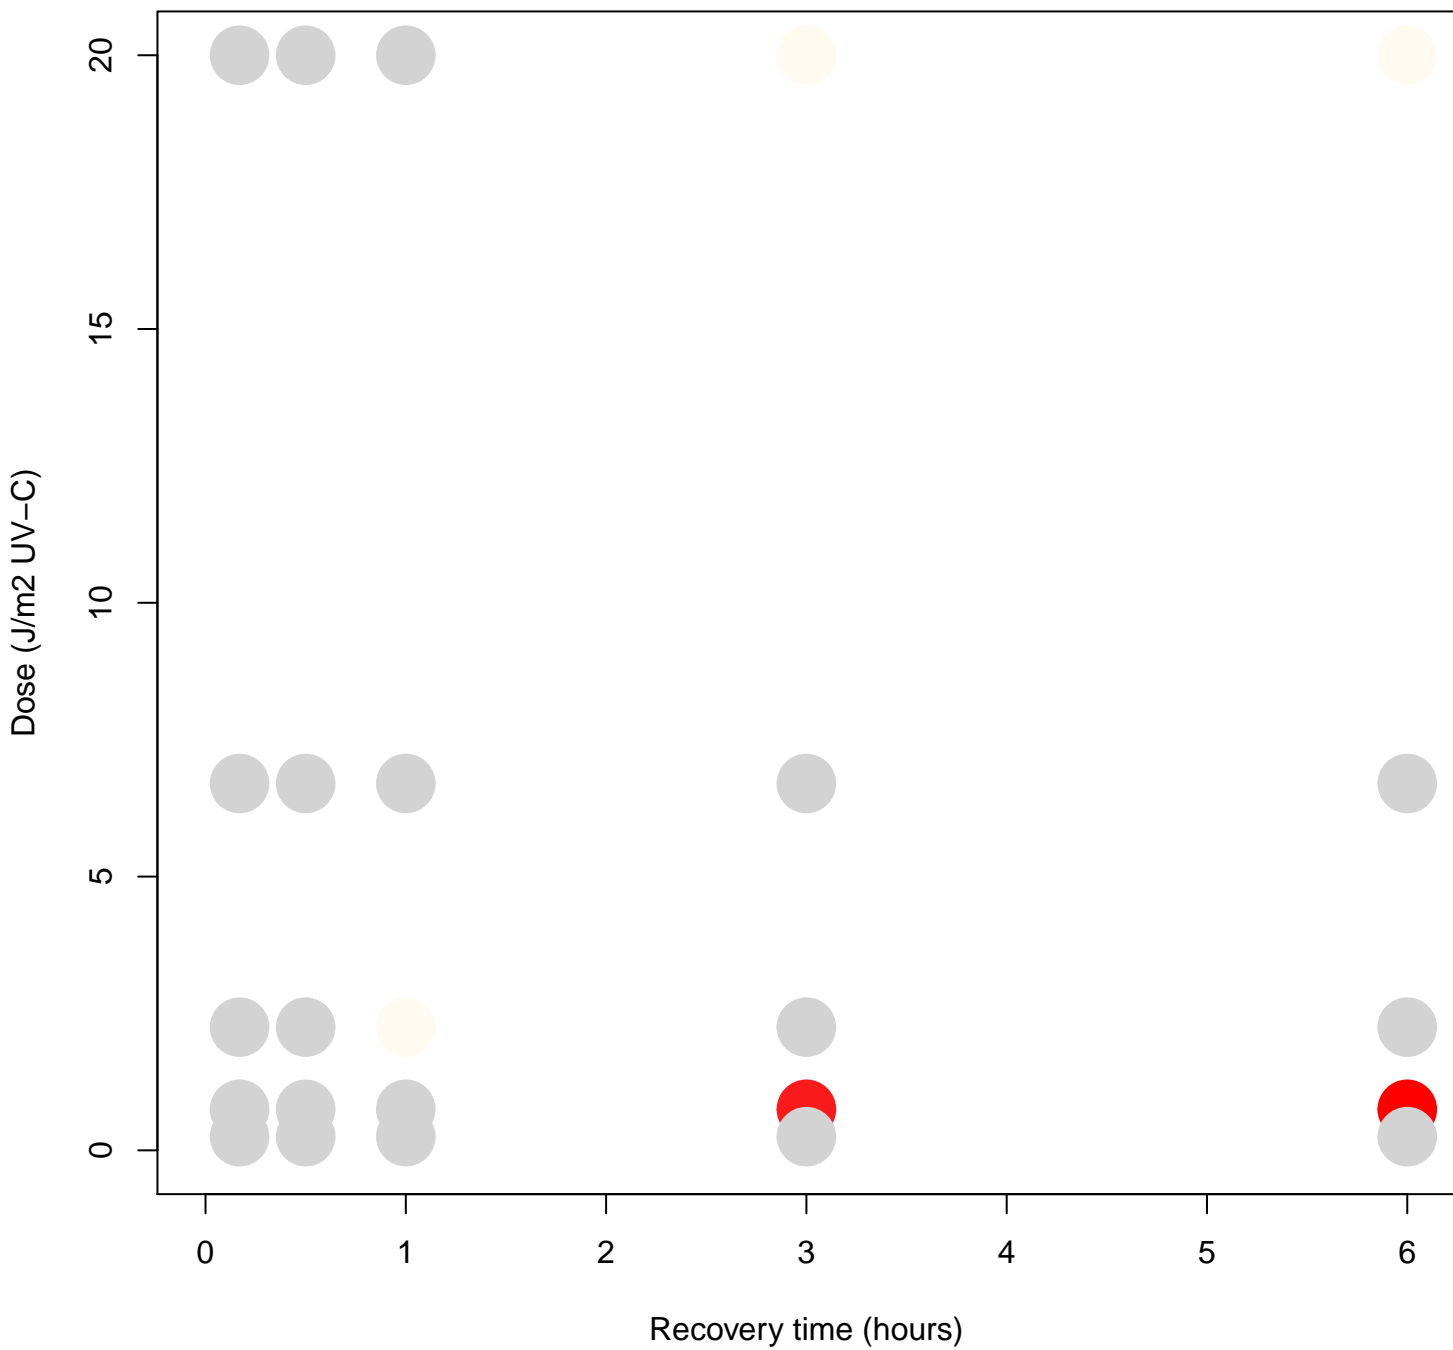

# MC\_maps\_transcription\_p53\_signalling\_pathway\_GST\_vs\_0\_in\_time\_FDR

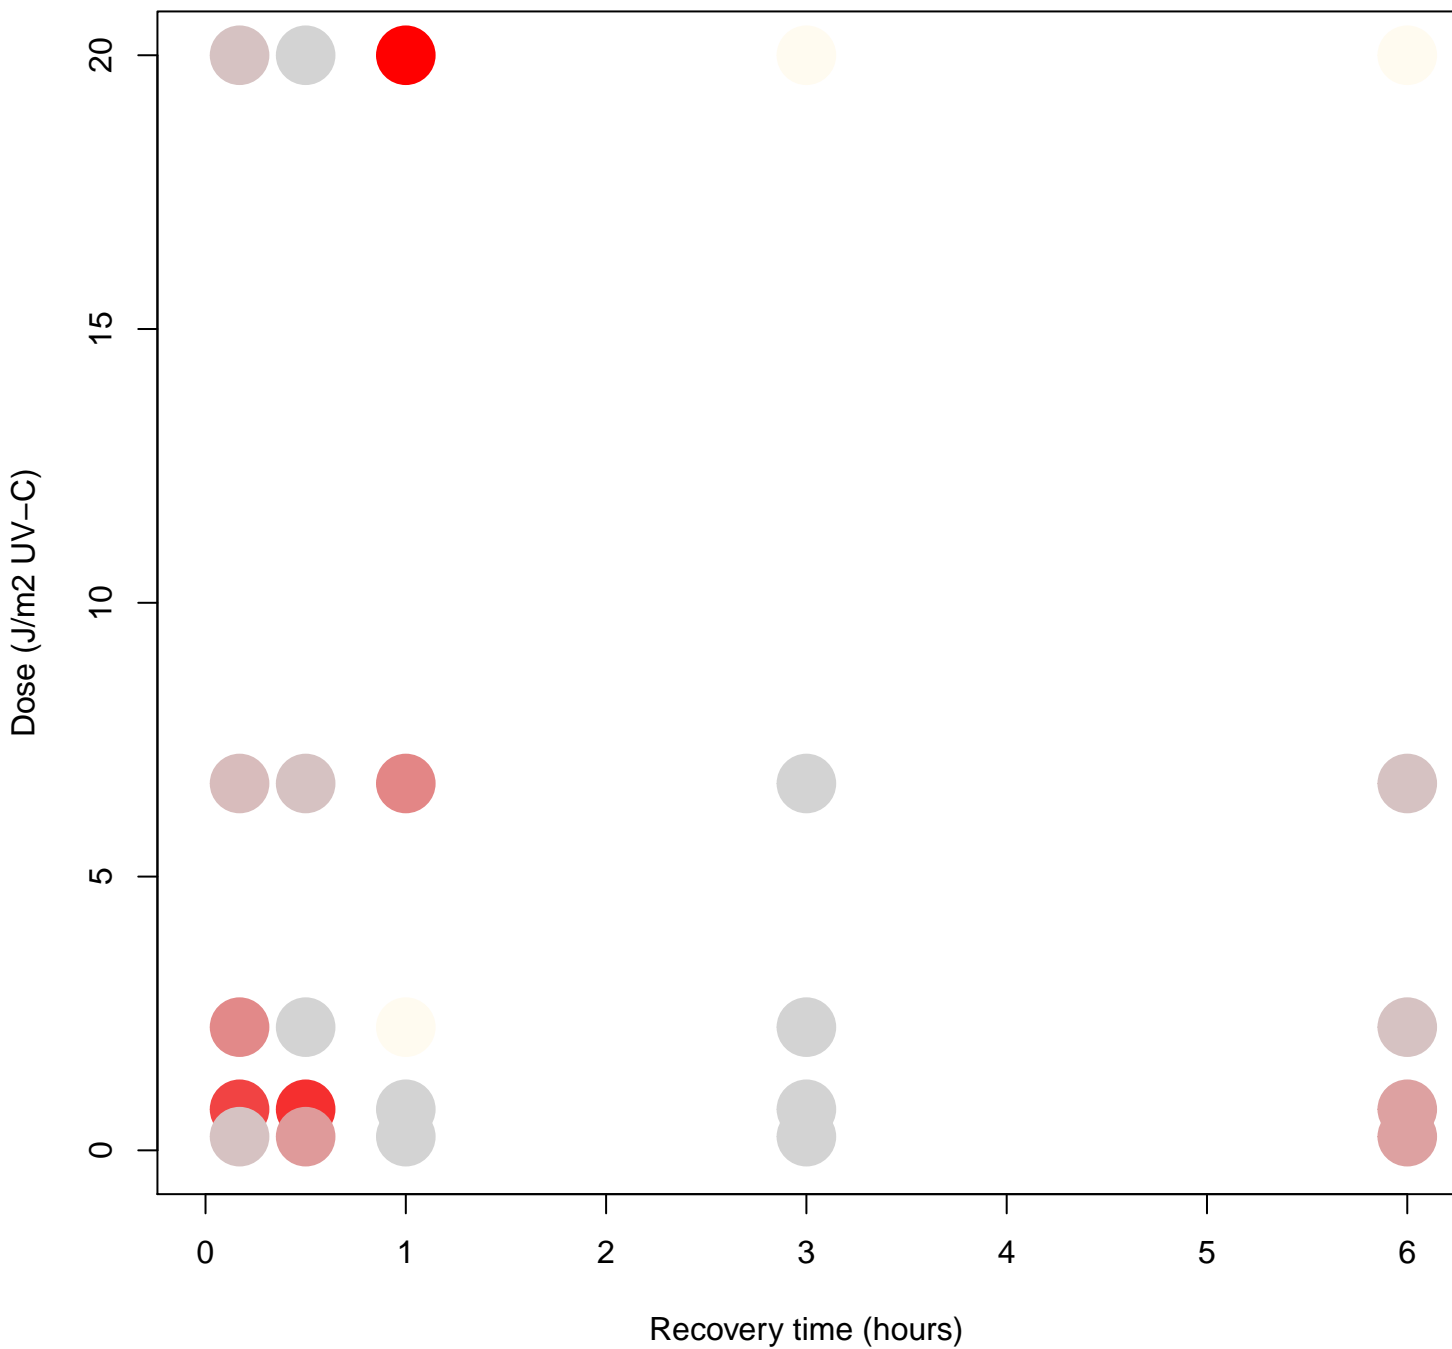

MC\_porc\_UVB\_response\_GST\_vs\_0\_in\_time\_FDR

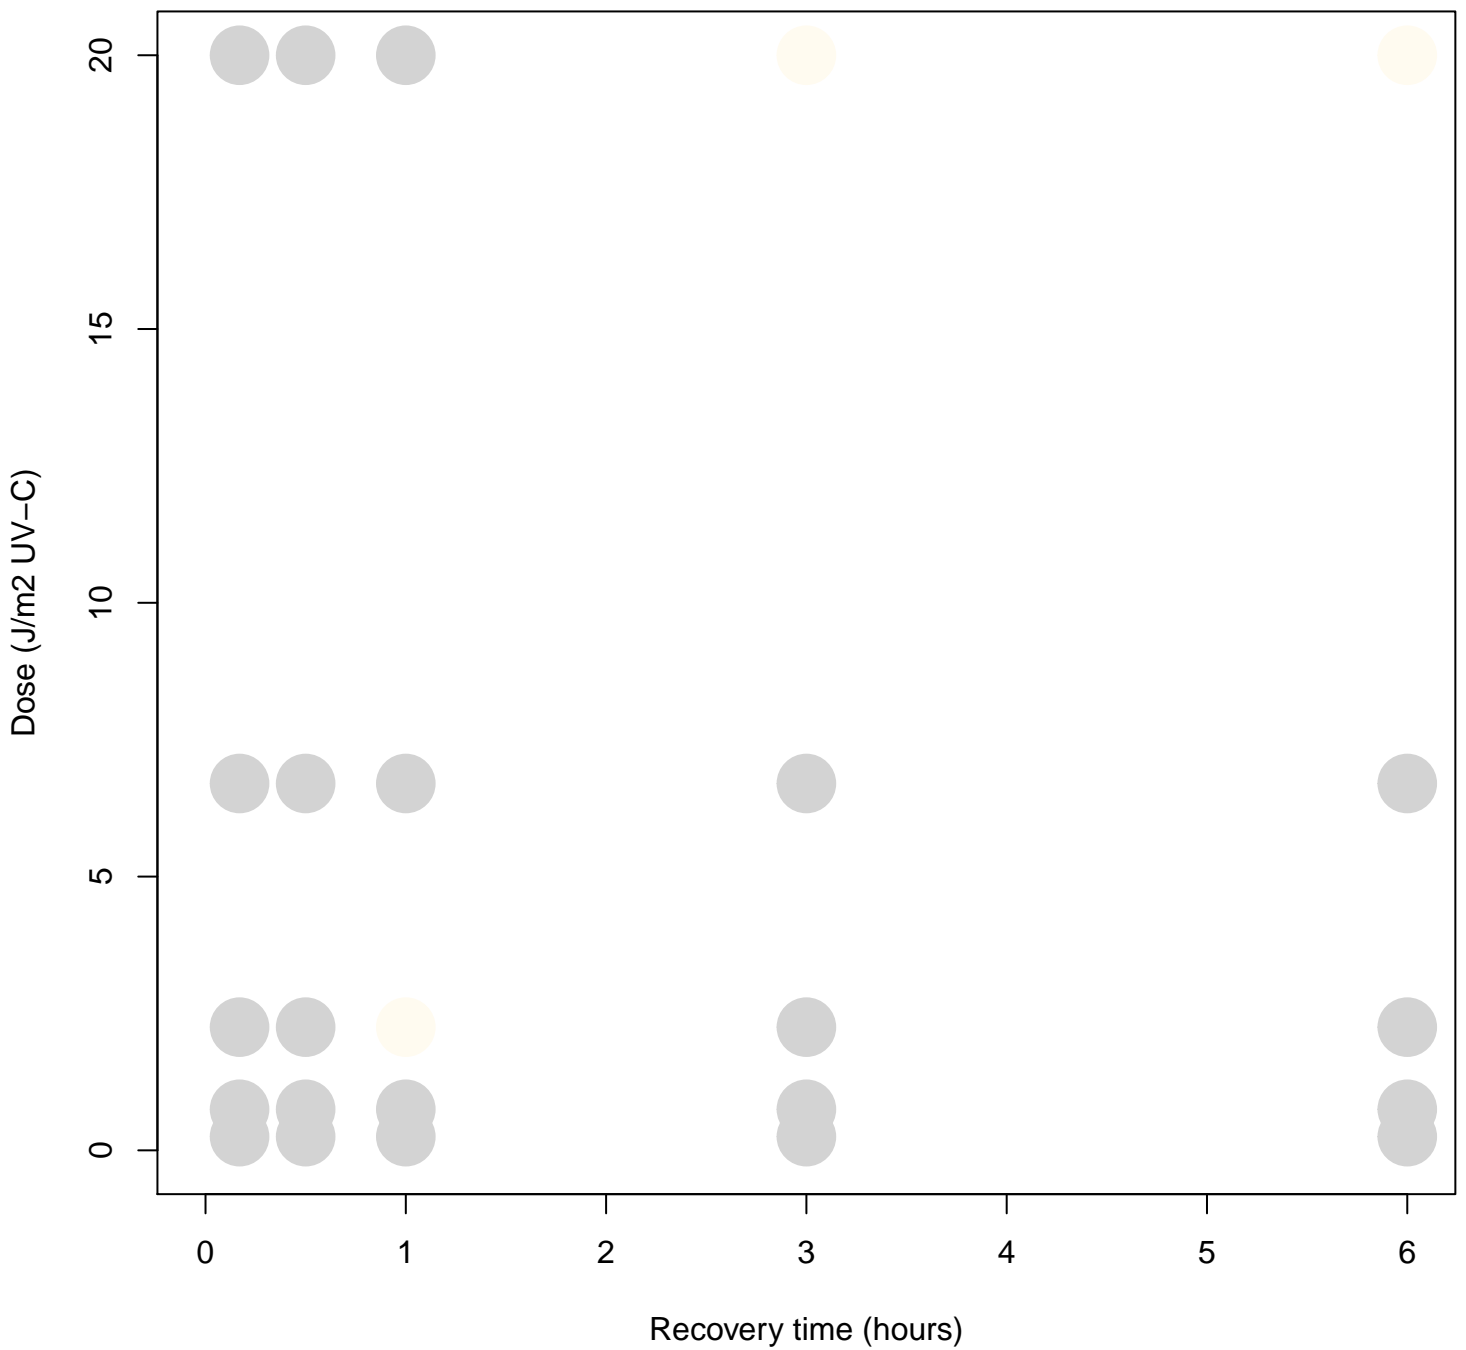

ss\_DNA\_damage\_response.\_signal\_transduction\_by\_p53.\_cell\_cycle\_arrest\_GST\_vs\_C

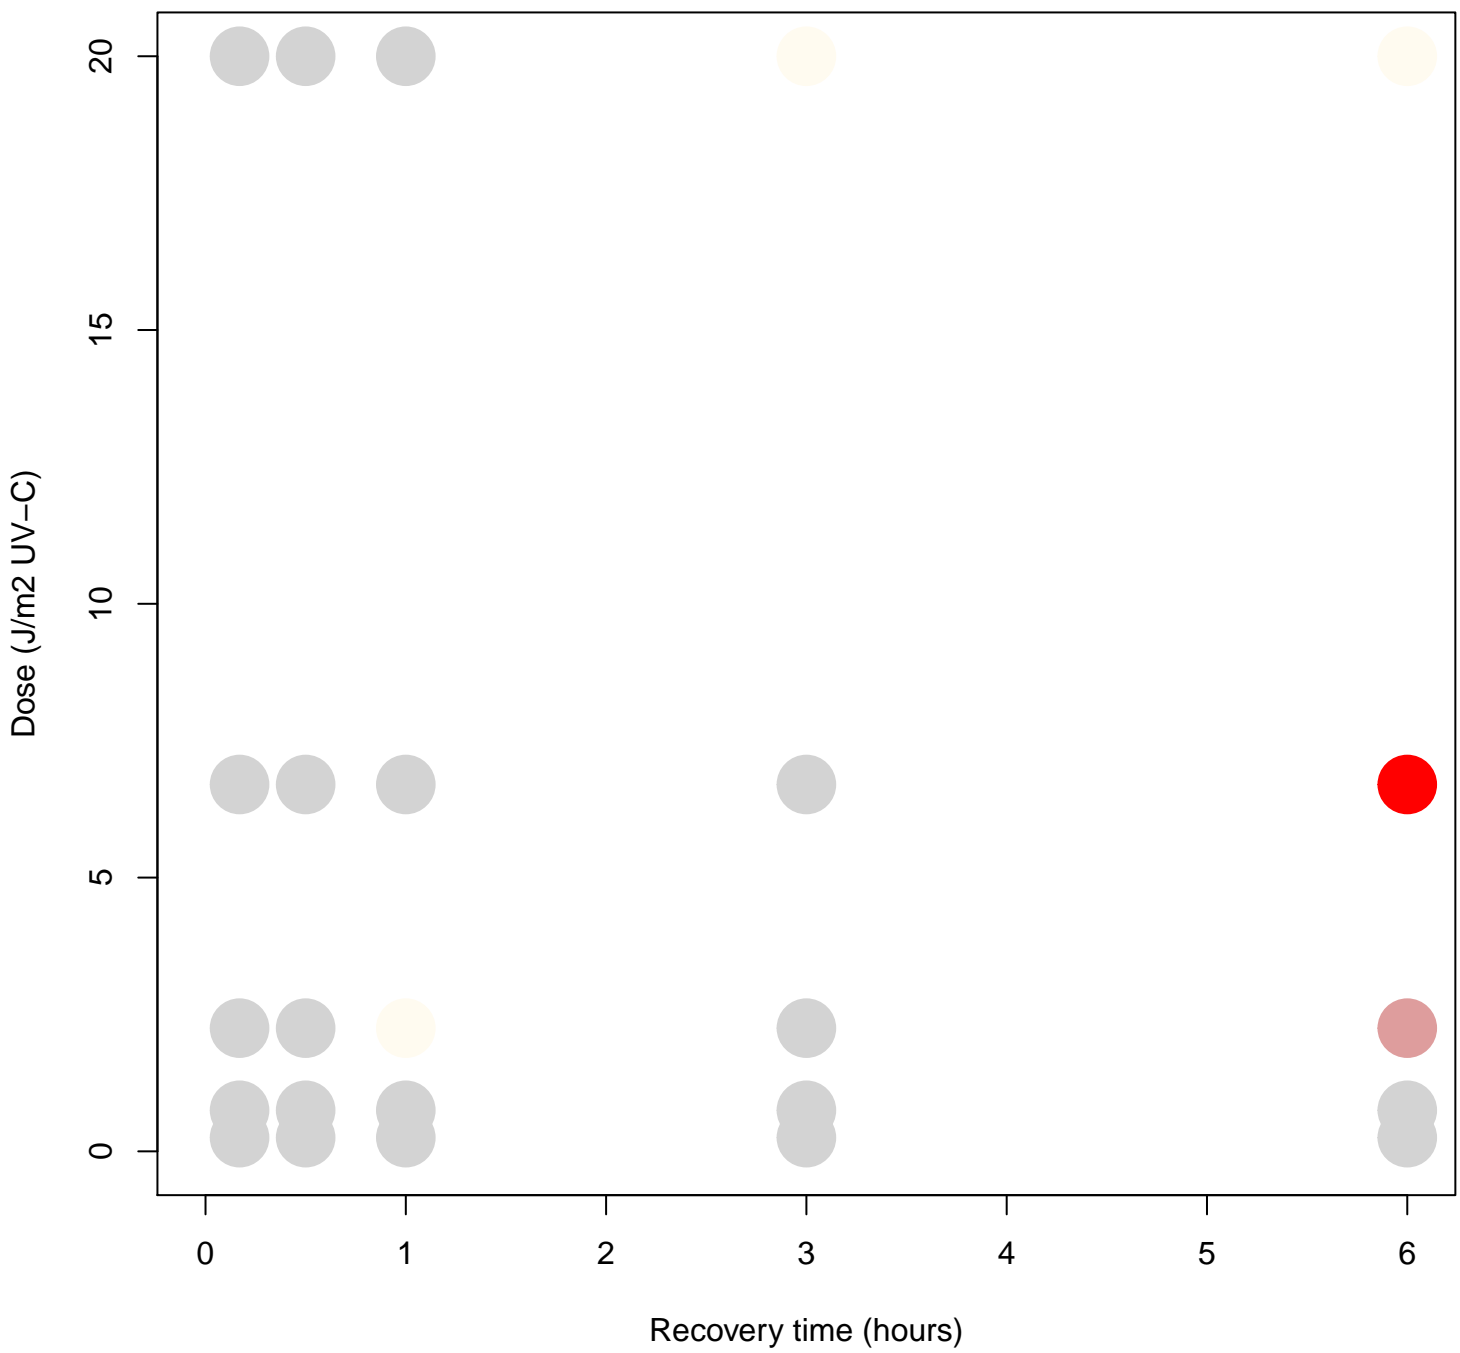

# MC\_process\_G1\_S\_transition\_\_GST\_vs\_0\_in\_time\_FDR



MC\_process\_UV\_response\_GST\_vs\_0\_in\_time\_FDR

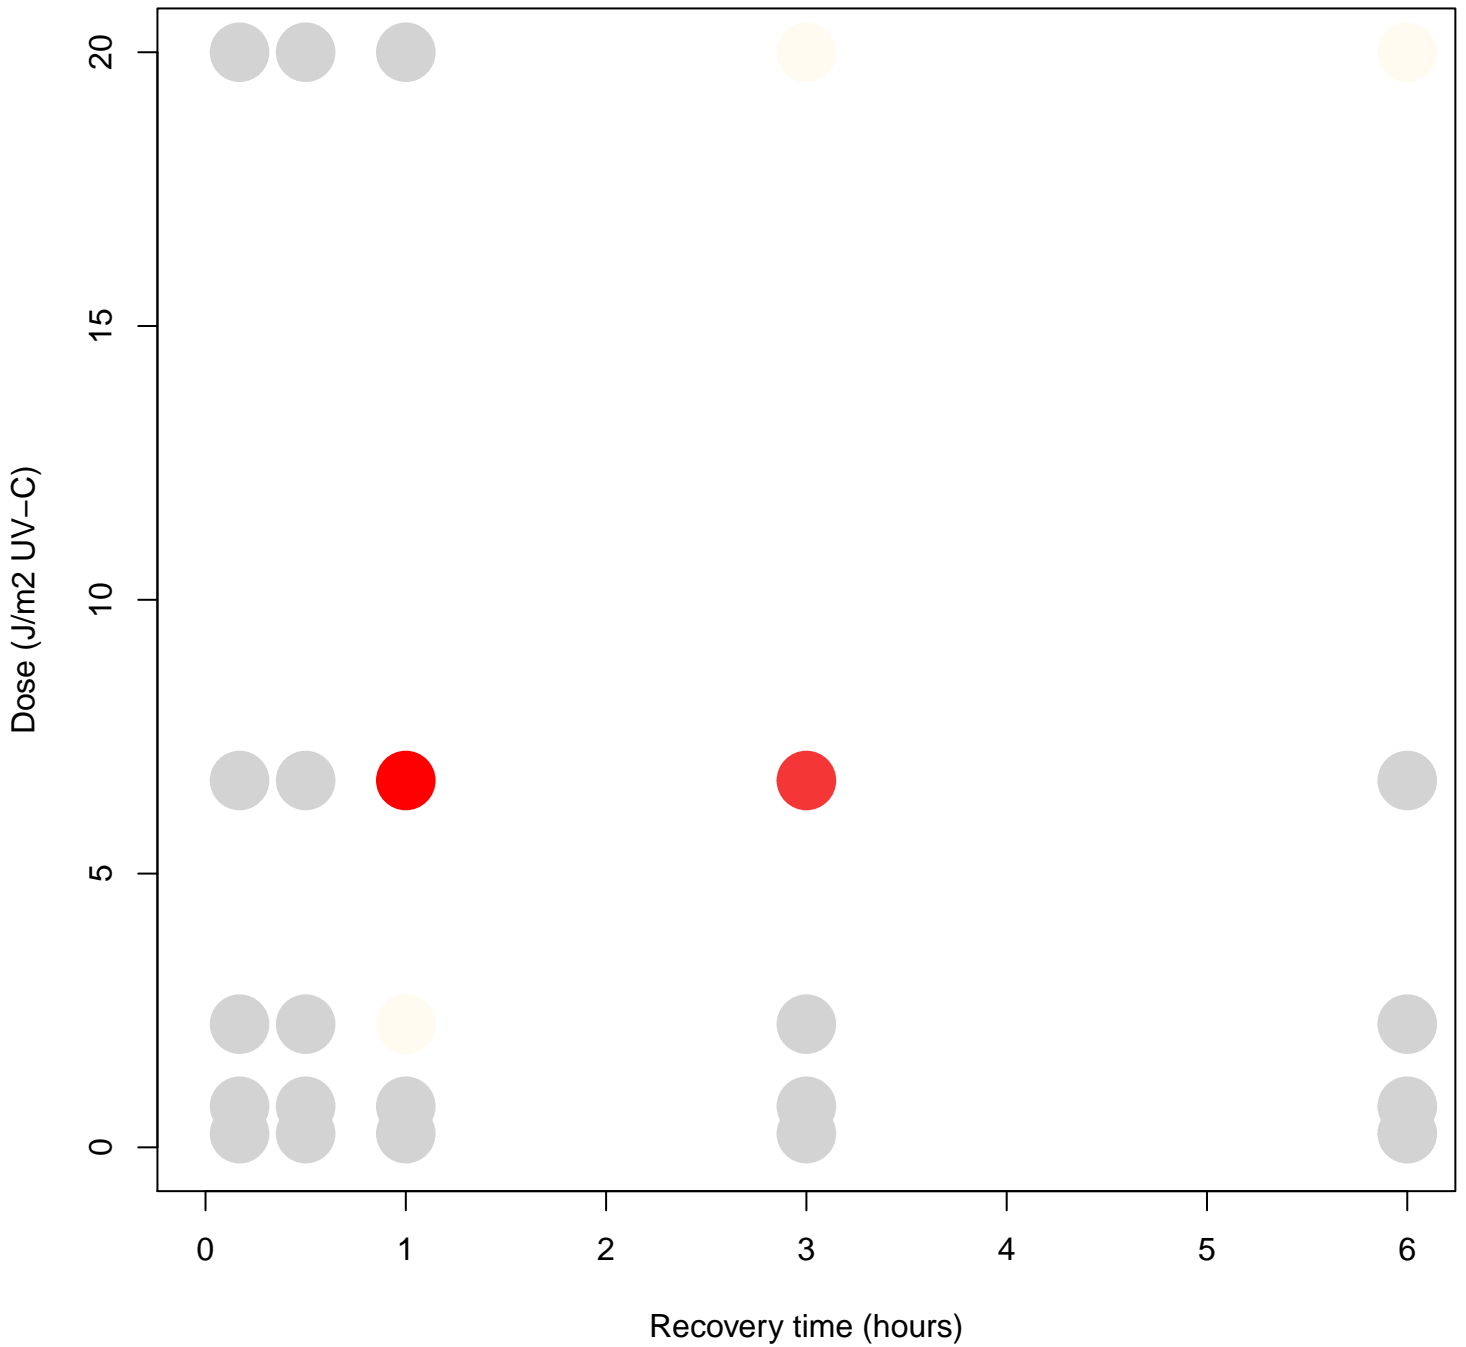

MC\_process\_UV\_response.1\_GST\_vs\_0\_in\_time\_FDR

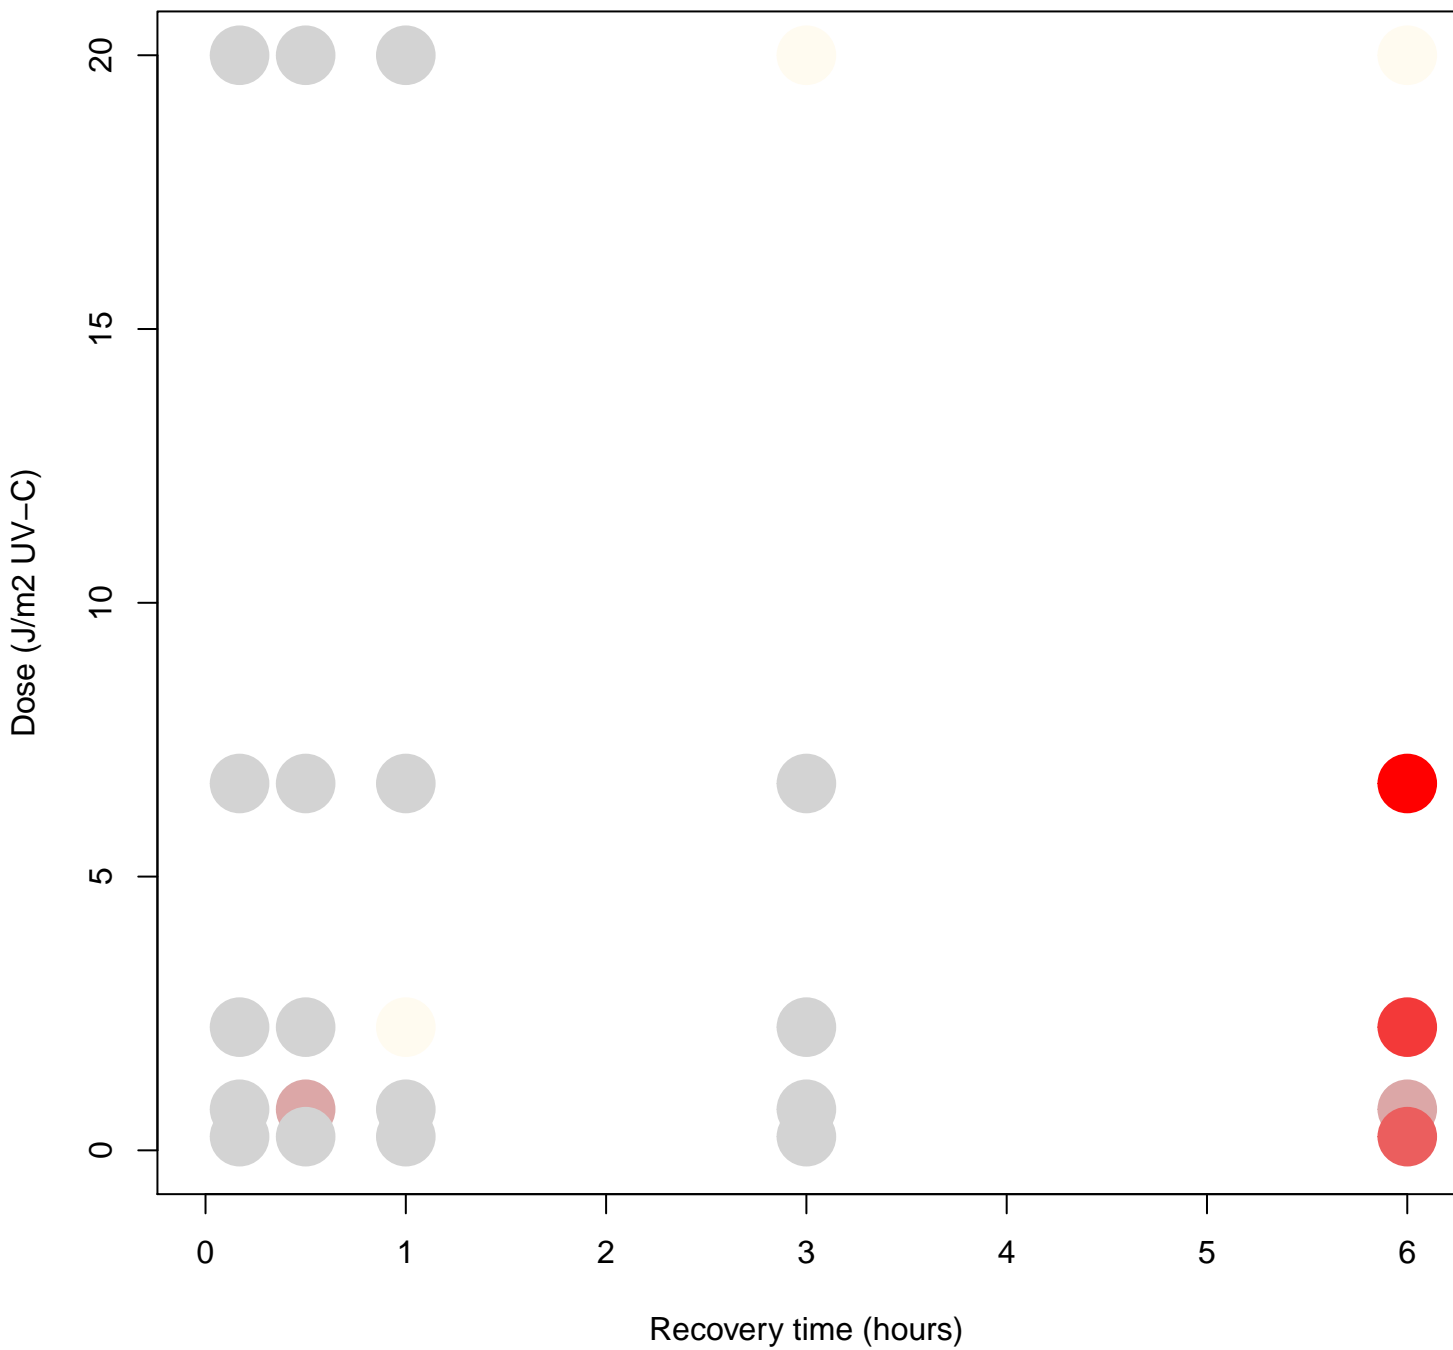

MC\_proc\_NER\_GST\_vs\_0\_in\_time\_FDR

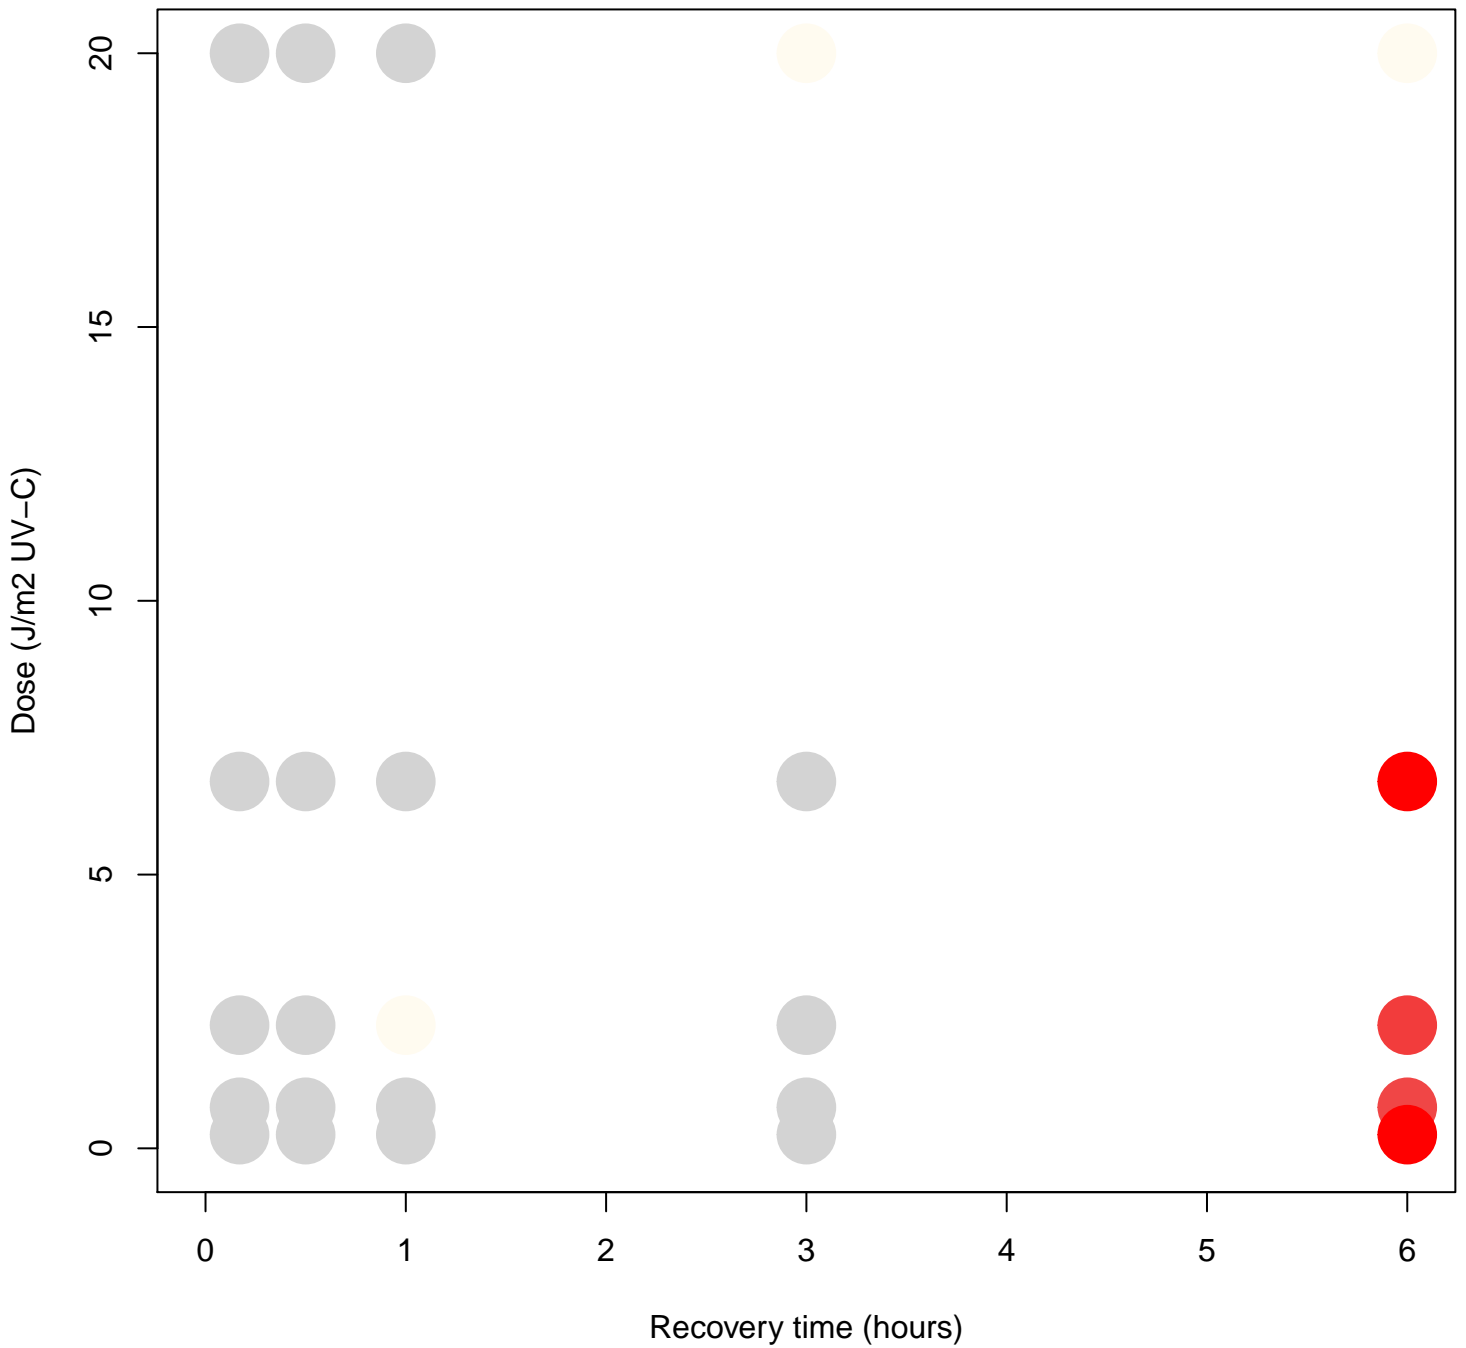



MC\_proc\_UVC\_response\_GST\_vs\_0\_in\_time\_FDR

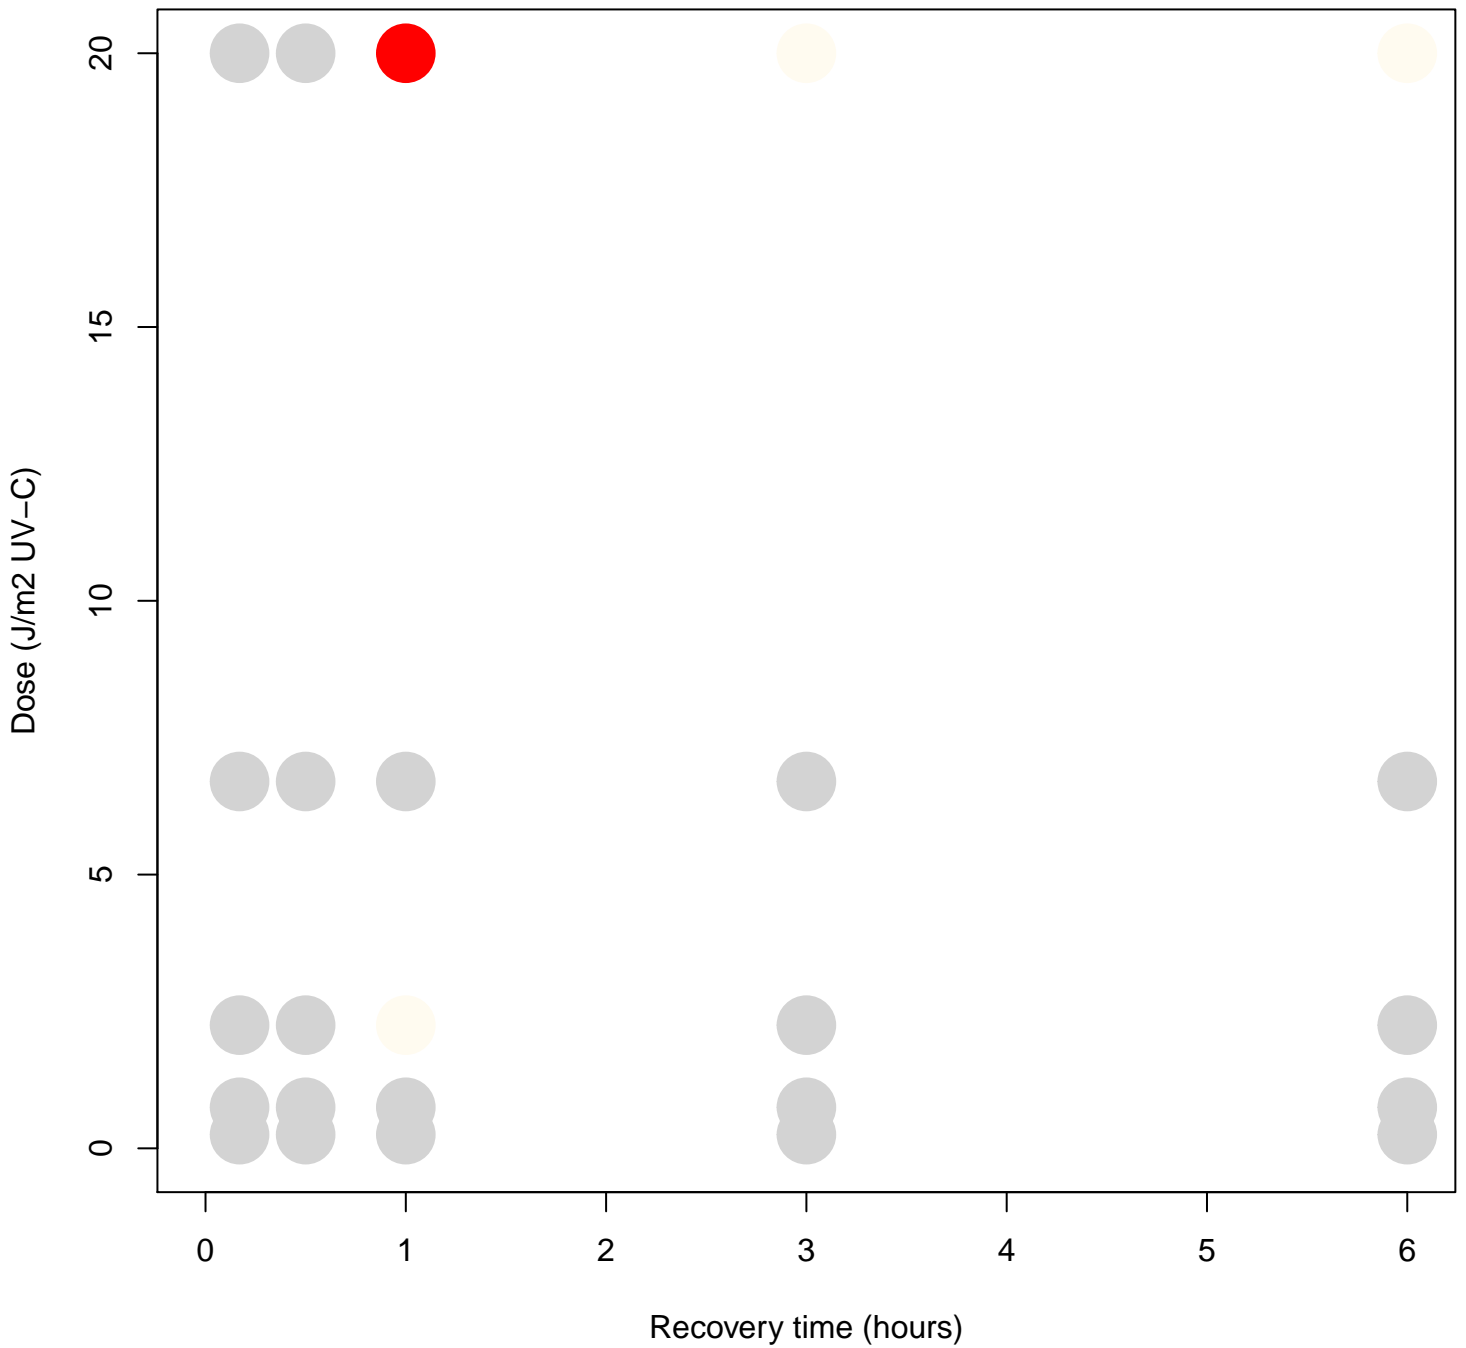

# Proefschrift\_Wendy\_B\_GST\_vs\_0\_in\_time\_FDR

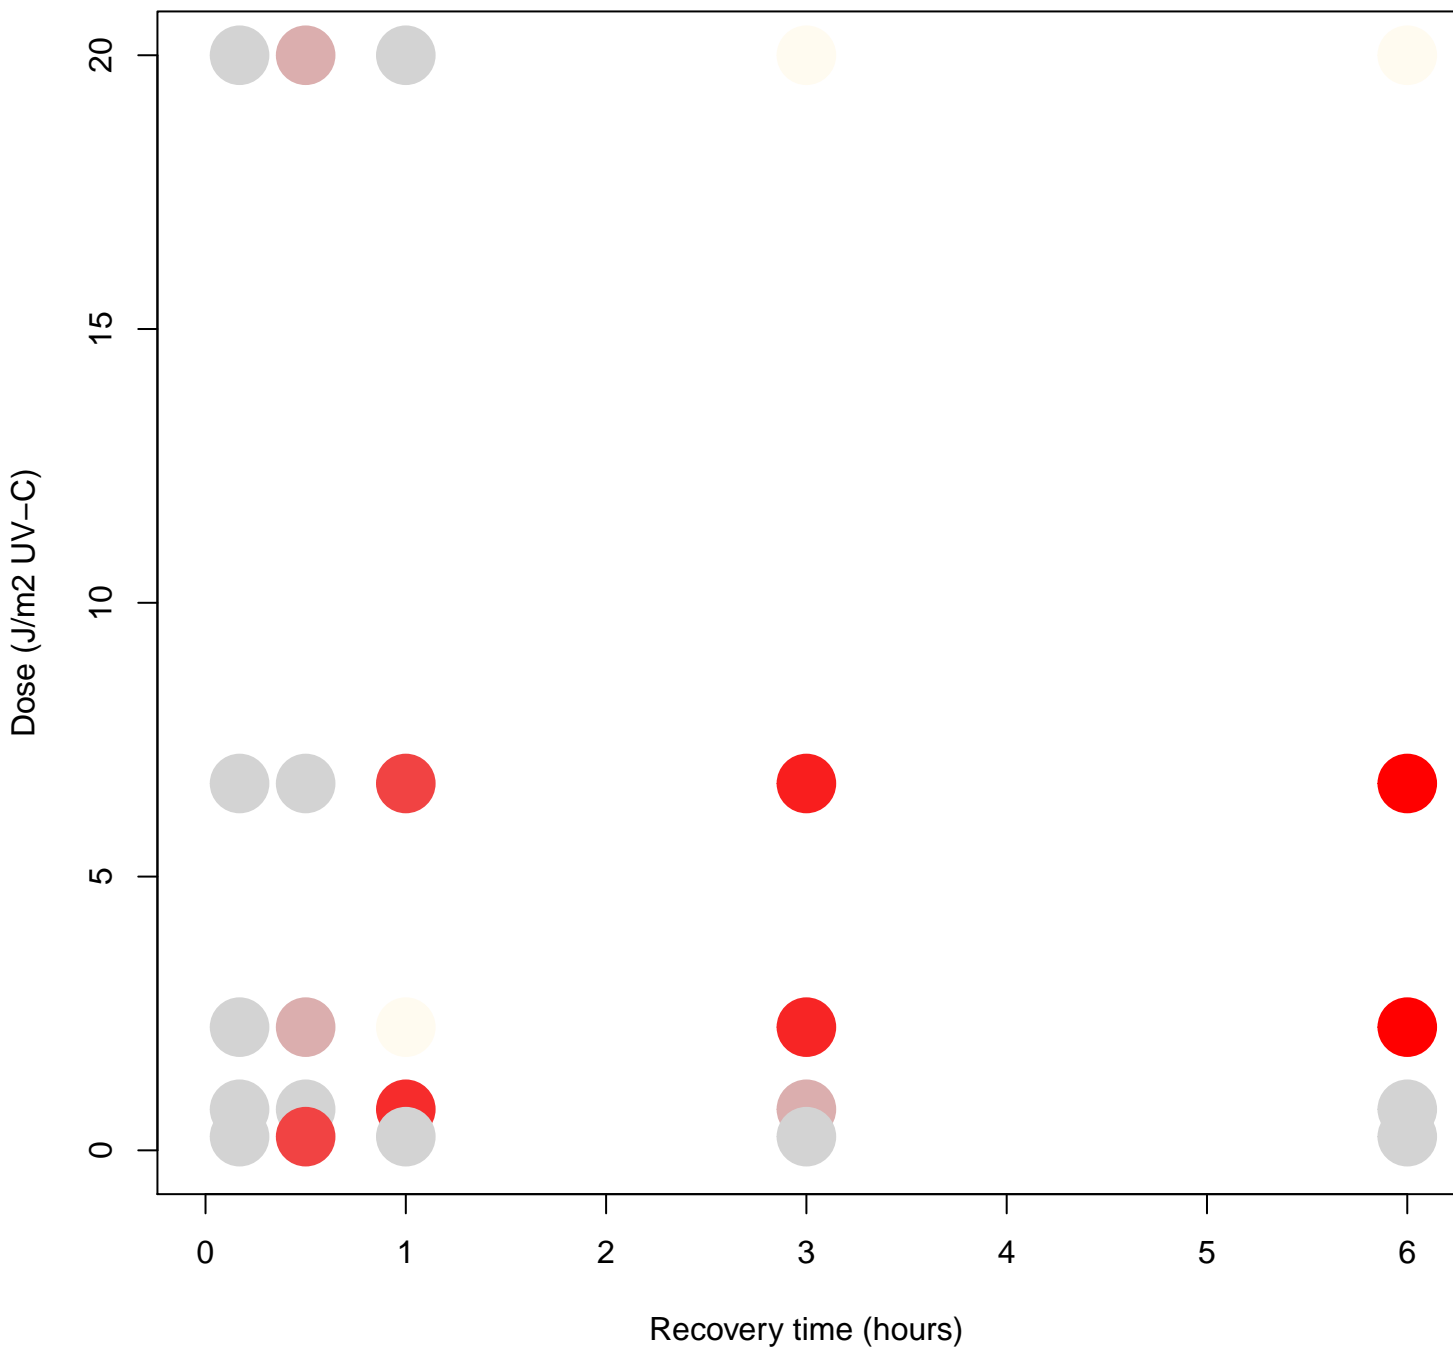

Riley\_S1\_p53\_regulated\_genes\_GST\_vs\_0\_in\_time\_FDR

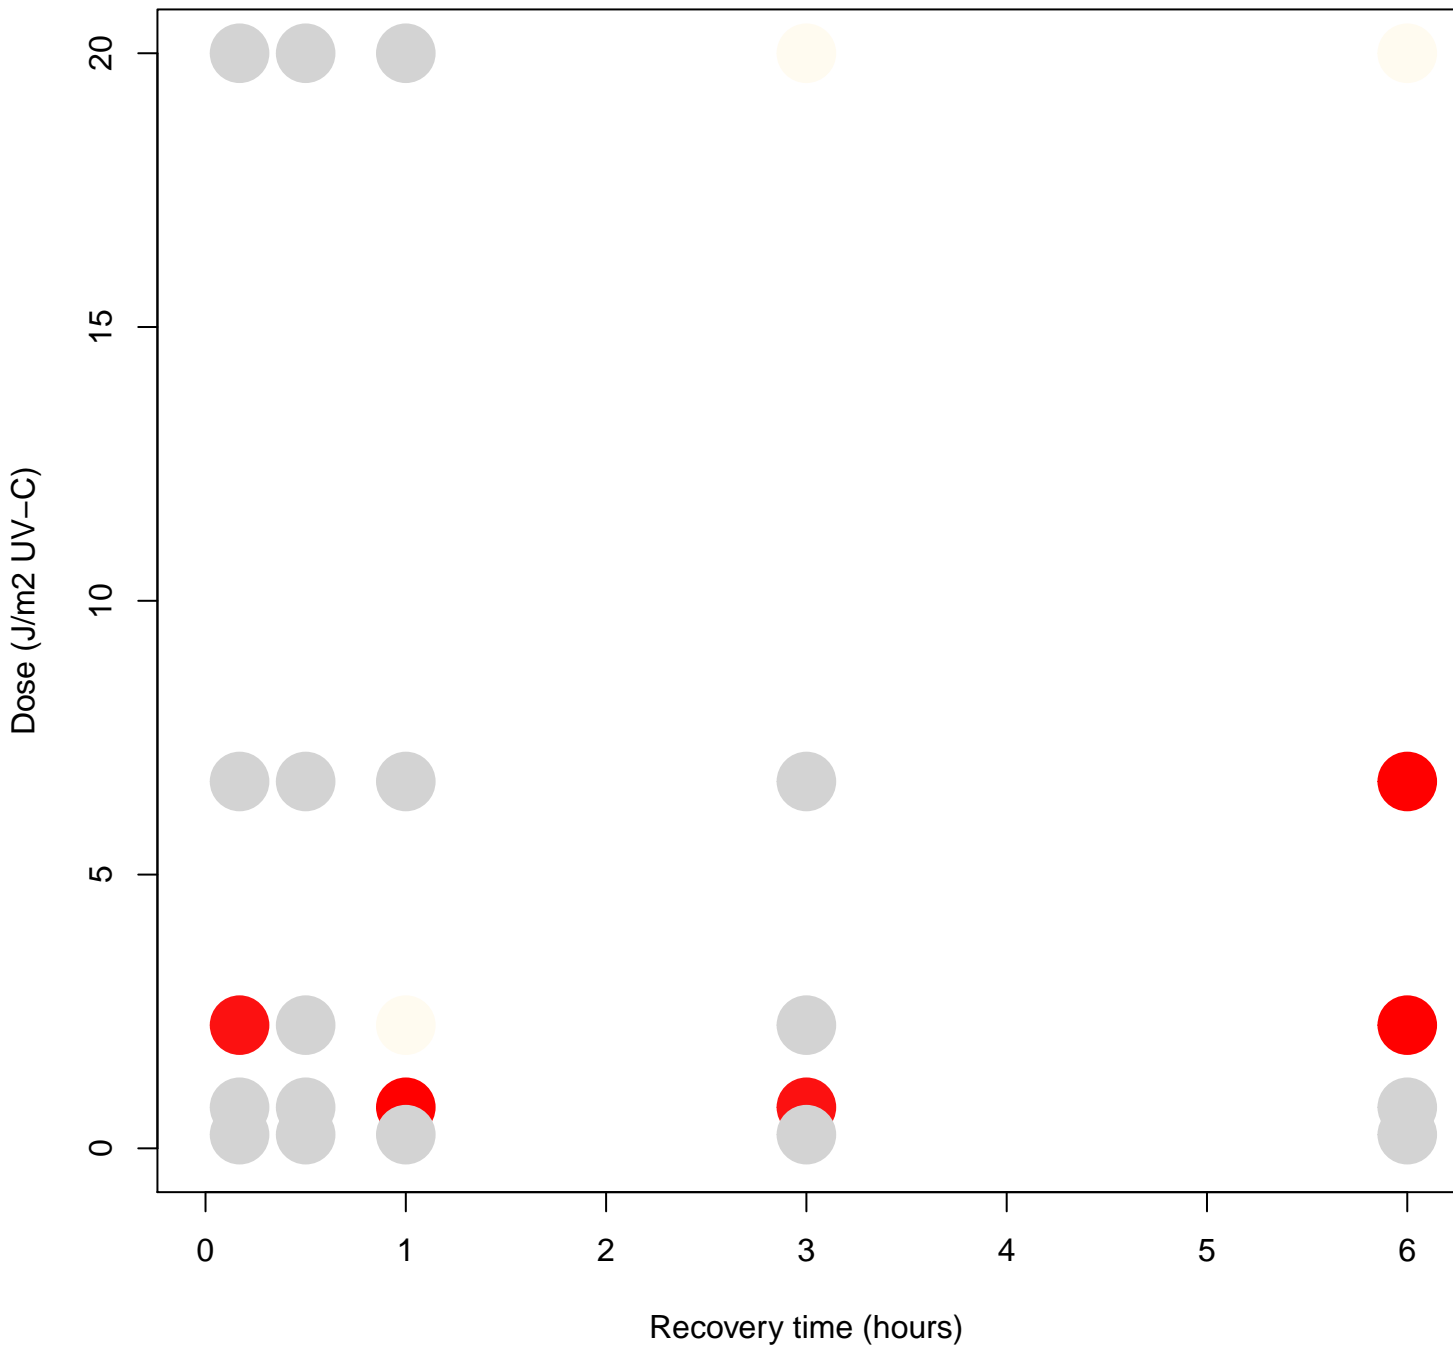

Smeenk\_S1\_GST\_vs\_0\_in\_time\_FDR

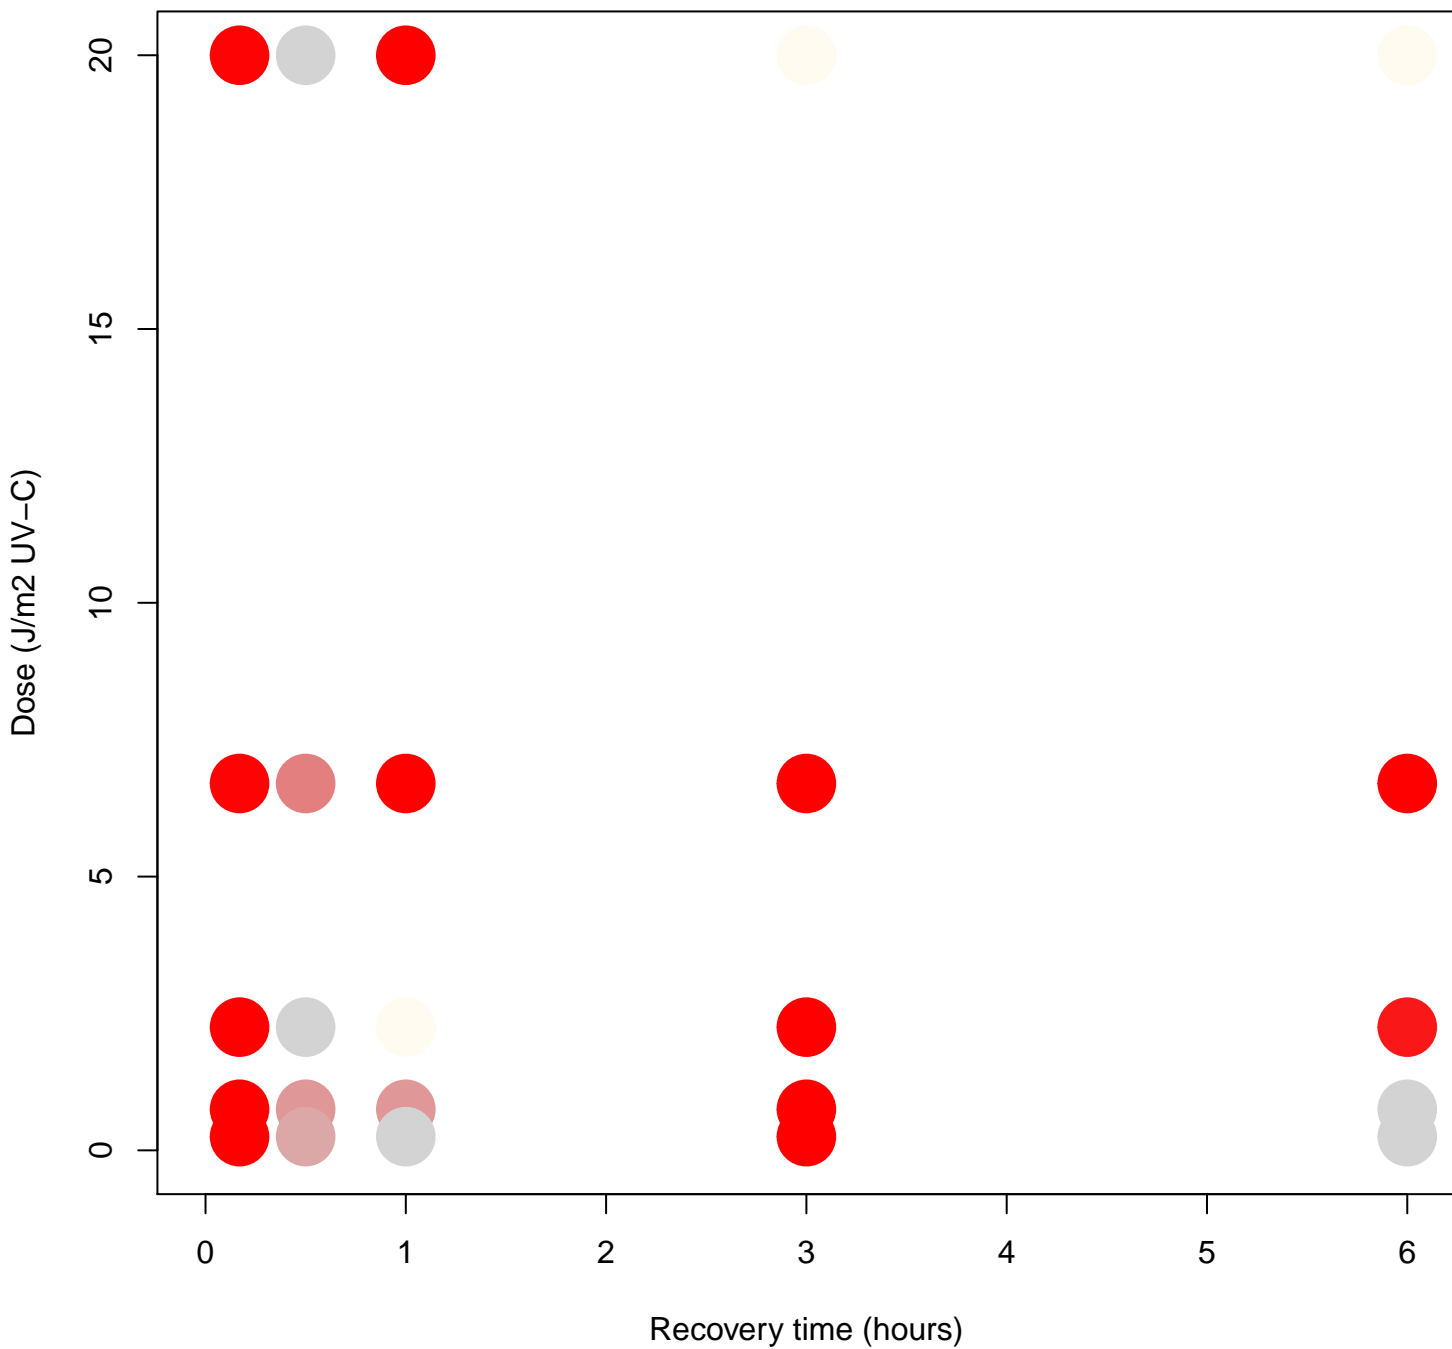

# WEI\_Apoptosis\_Cell\_Cycle\_GST\_vs\_0\_in\_time\_FDR

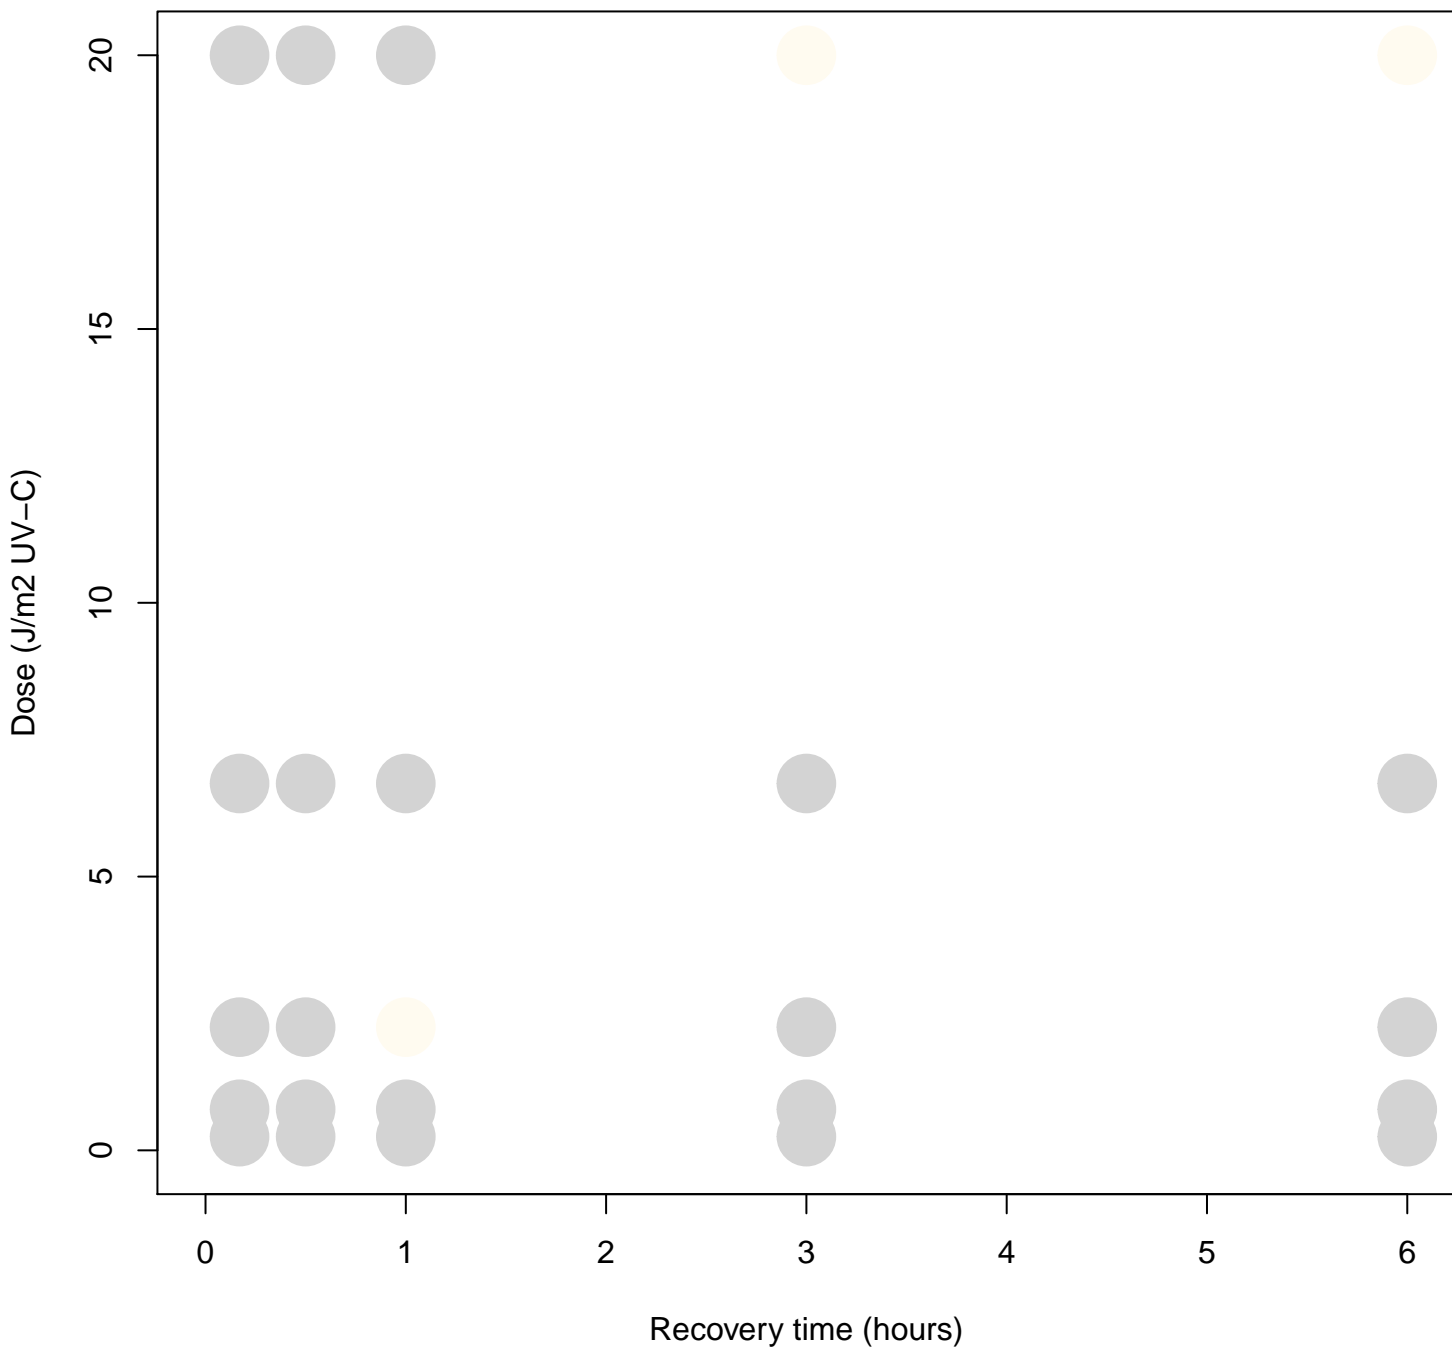

# WEI\_Biosynthesis\_Metabolism\_GST\_vs\_0\_in\_time\_FDR



WEI\_Cell\_Adhesion\_Mobility\_GST\_vs\_0\_in\_time\_FDR

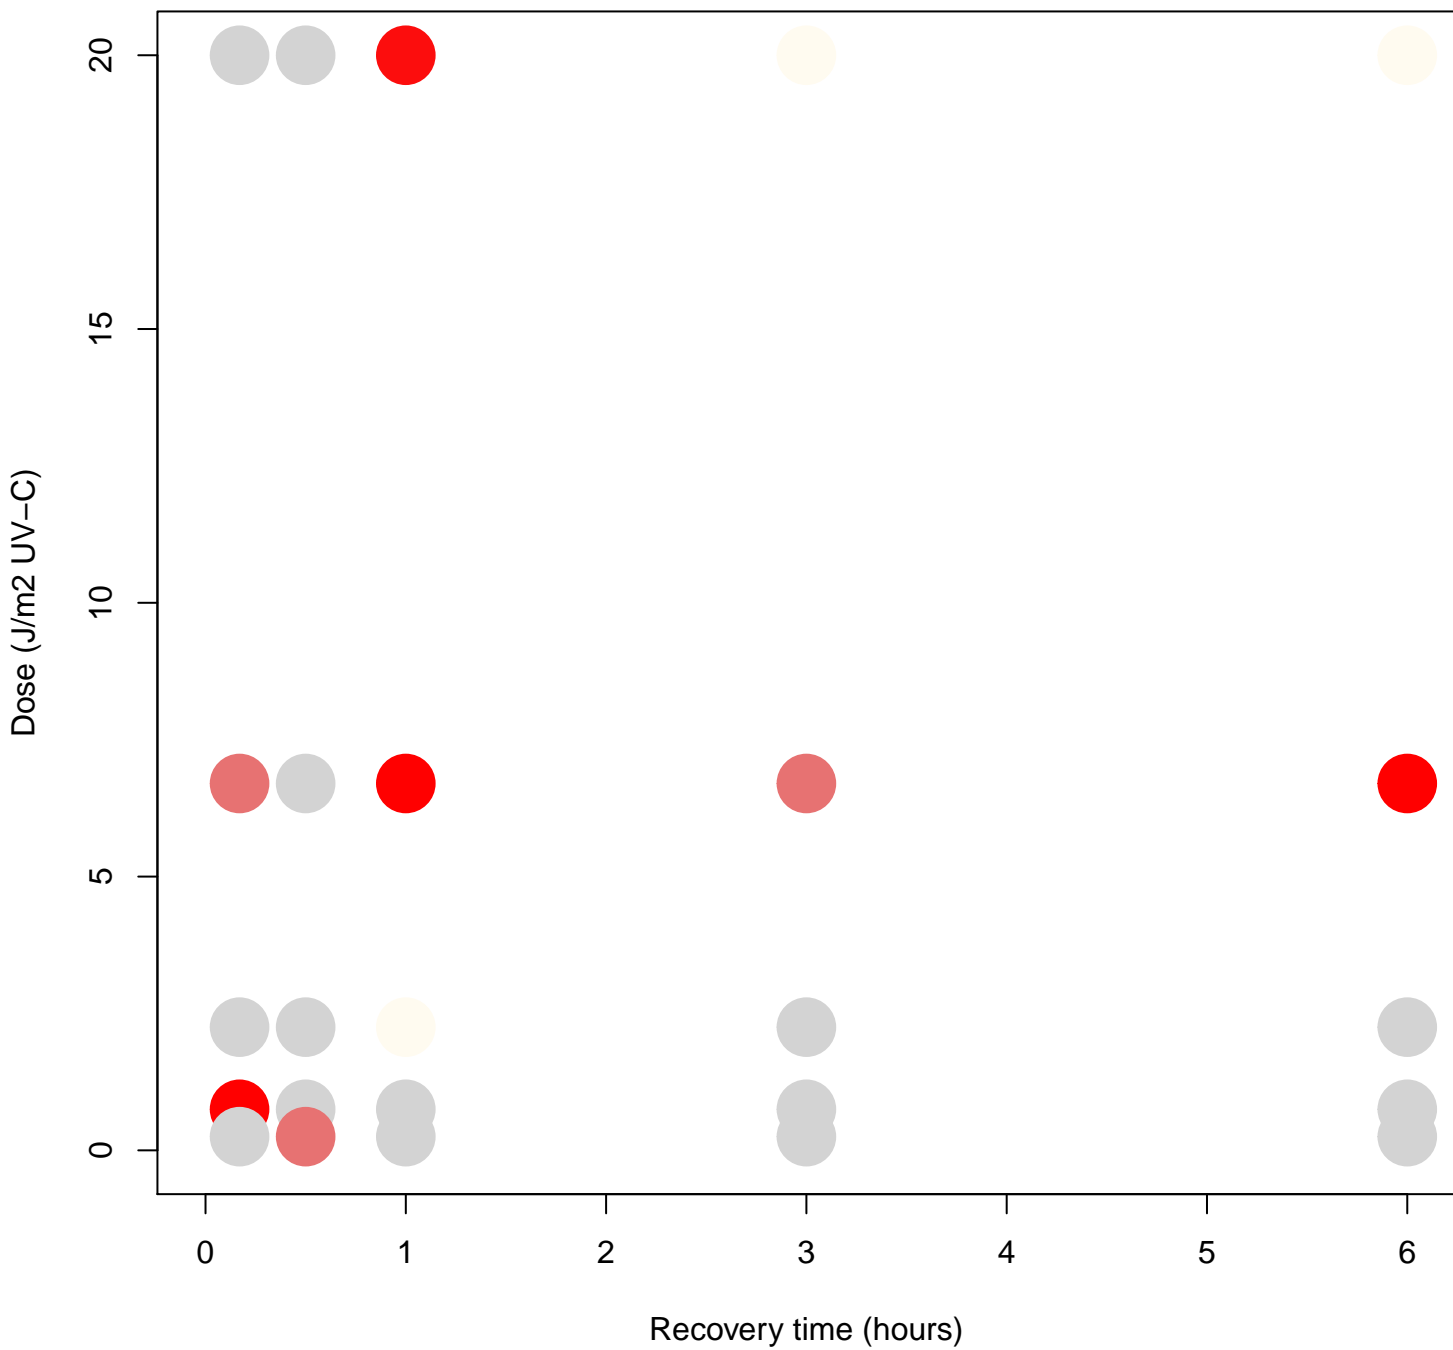

# WEI\_Cell\_Growth\_Differentiation\_GST\_vs\_0\_in\_time\_FDR

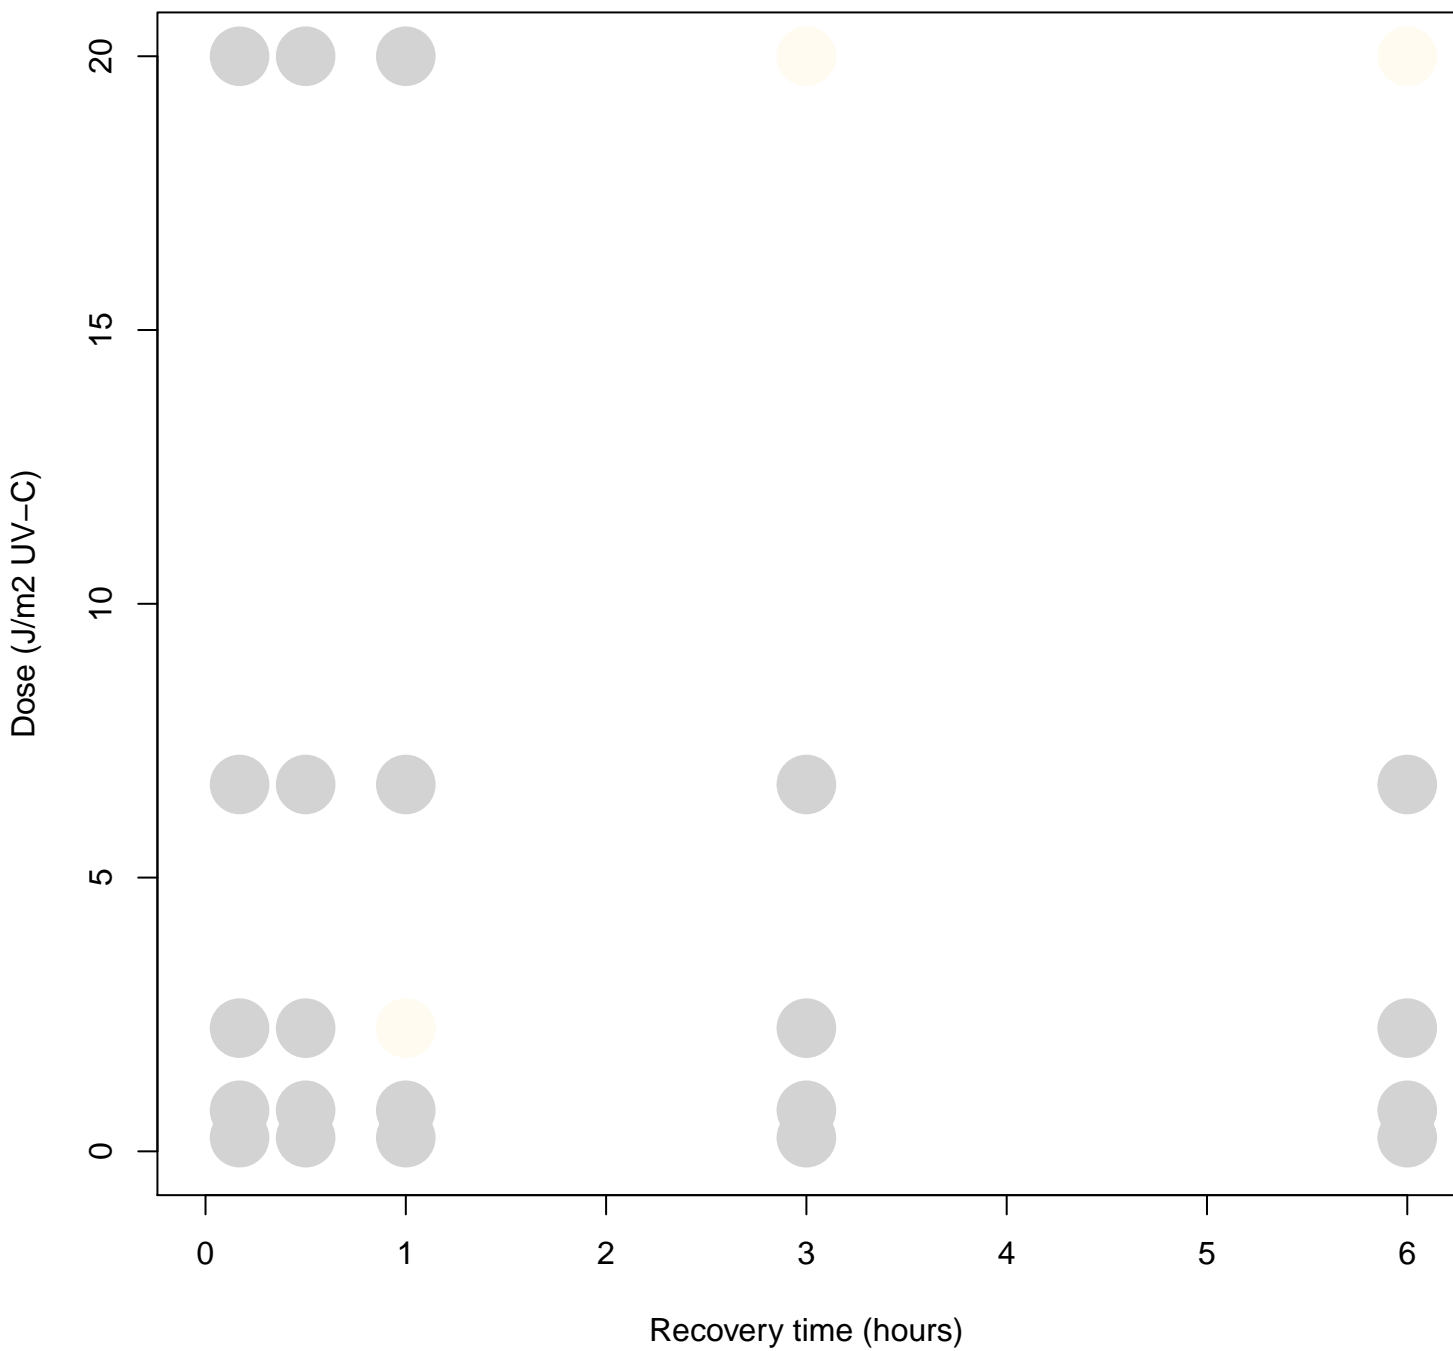



# WEI\_DNA\_Repair\_Chrom\_Modifier\_GST\_vs\_0\_in\_time\_FDR

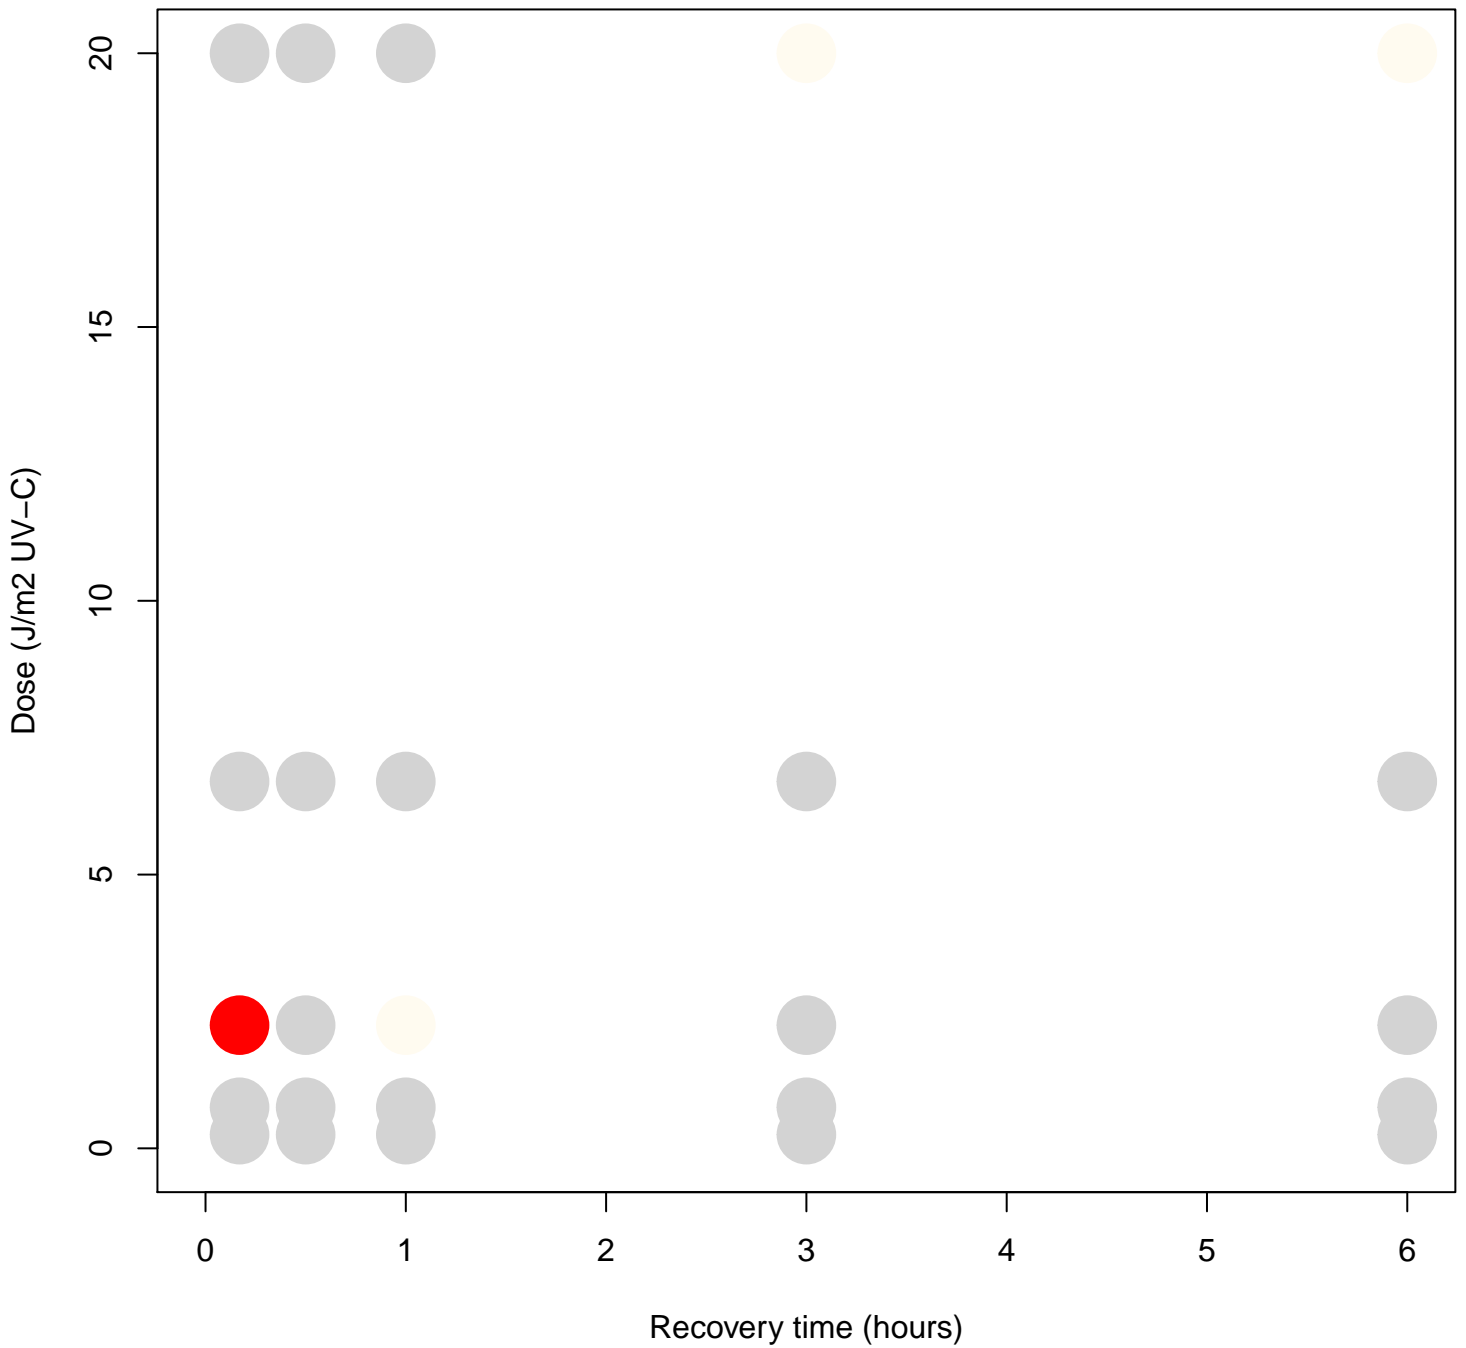

# WEI\_Protein\_Catabolism\_GST\_vs\_0\_in\_time\_FDR

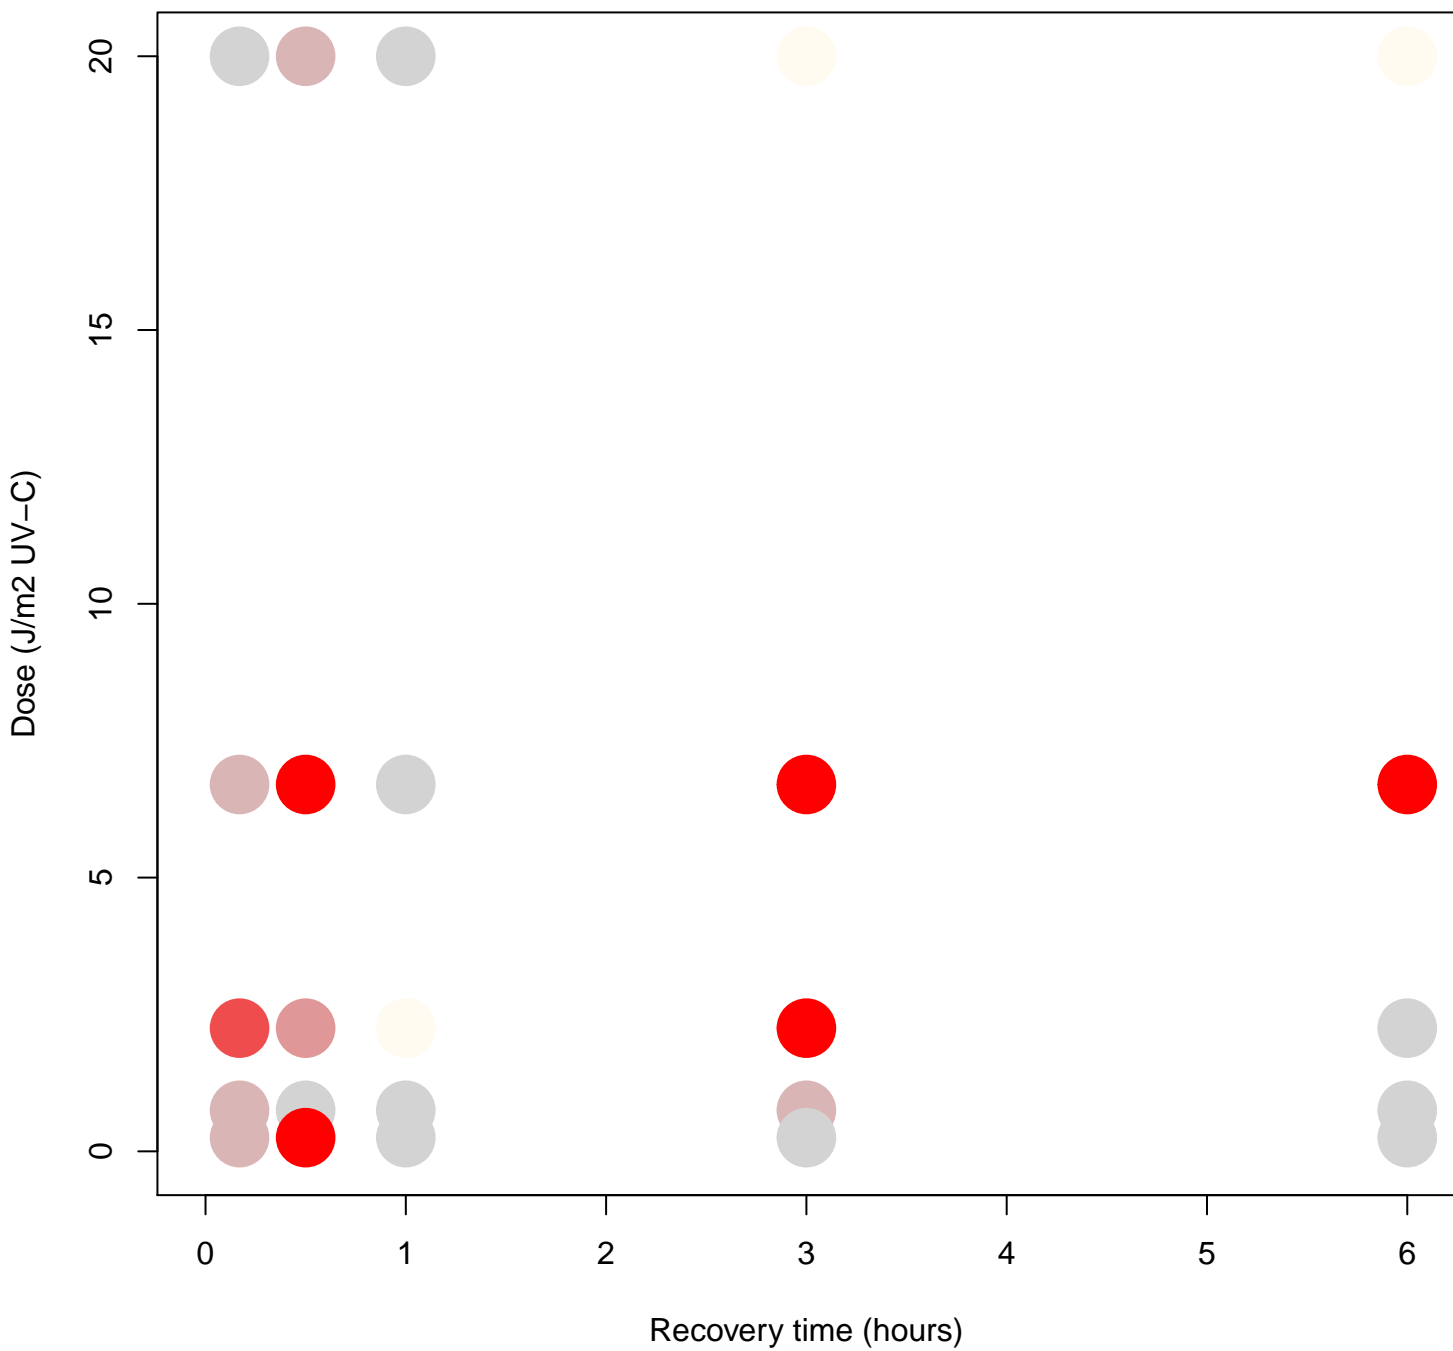

# Wei\_s4\_apoptosis\_GST\_vs\_0\_in\_time\_FDR

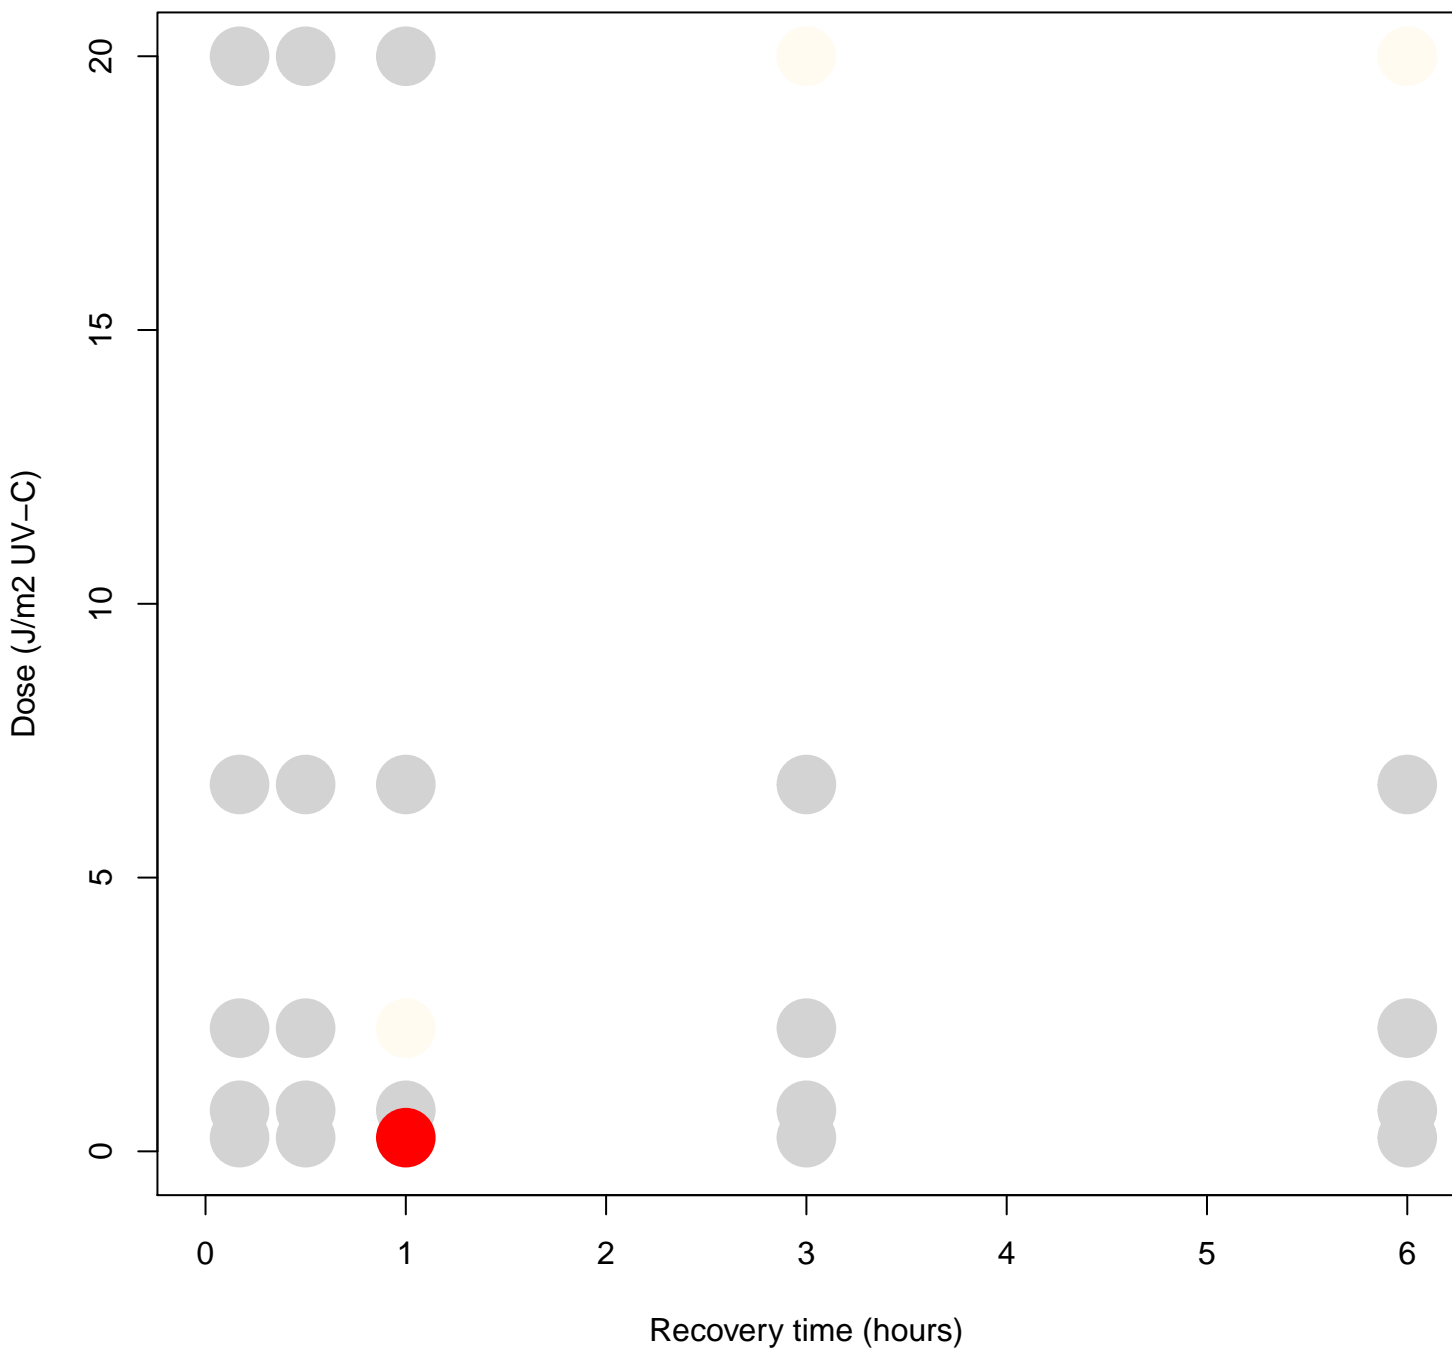

Wei\_s4\_cell\_cycle\_GST\_vs\_0\_in\_time\_FDR



Wei\_s4\_Cell\_growth\_GST\_vs\_0\_in\_time\_FDR

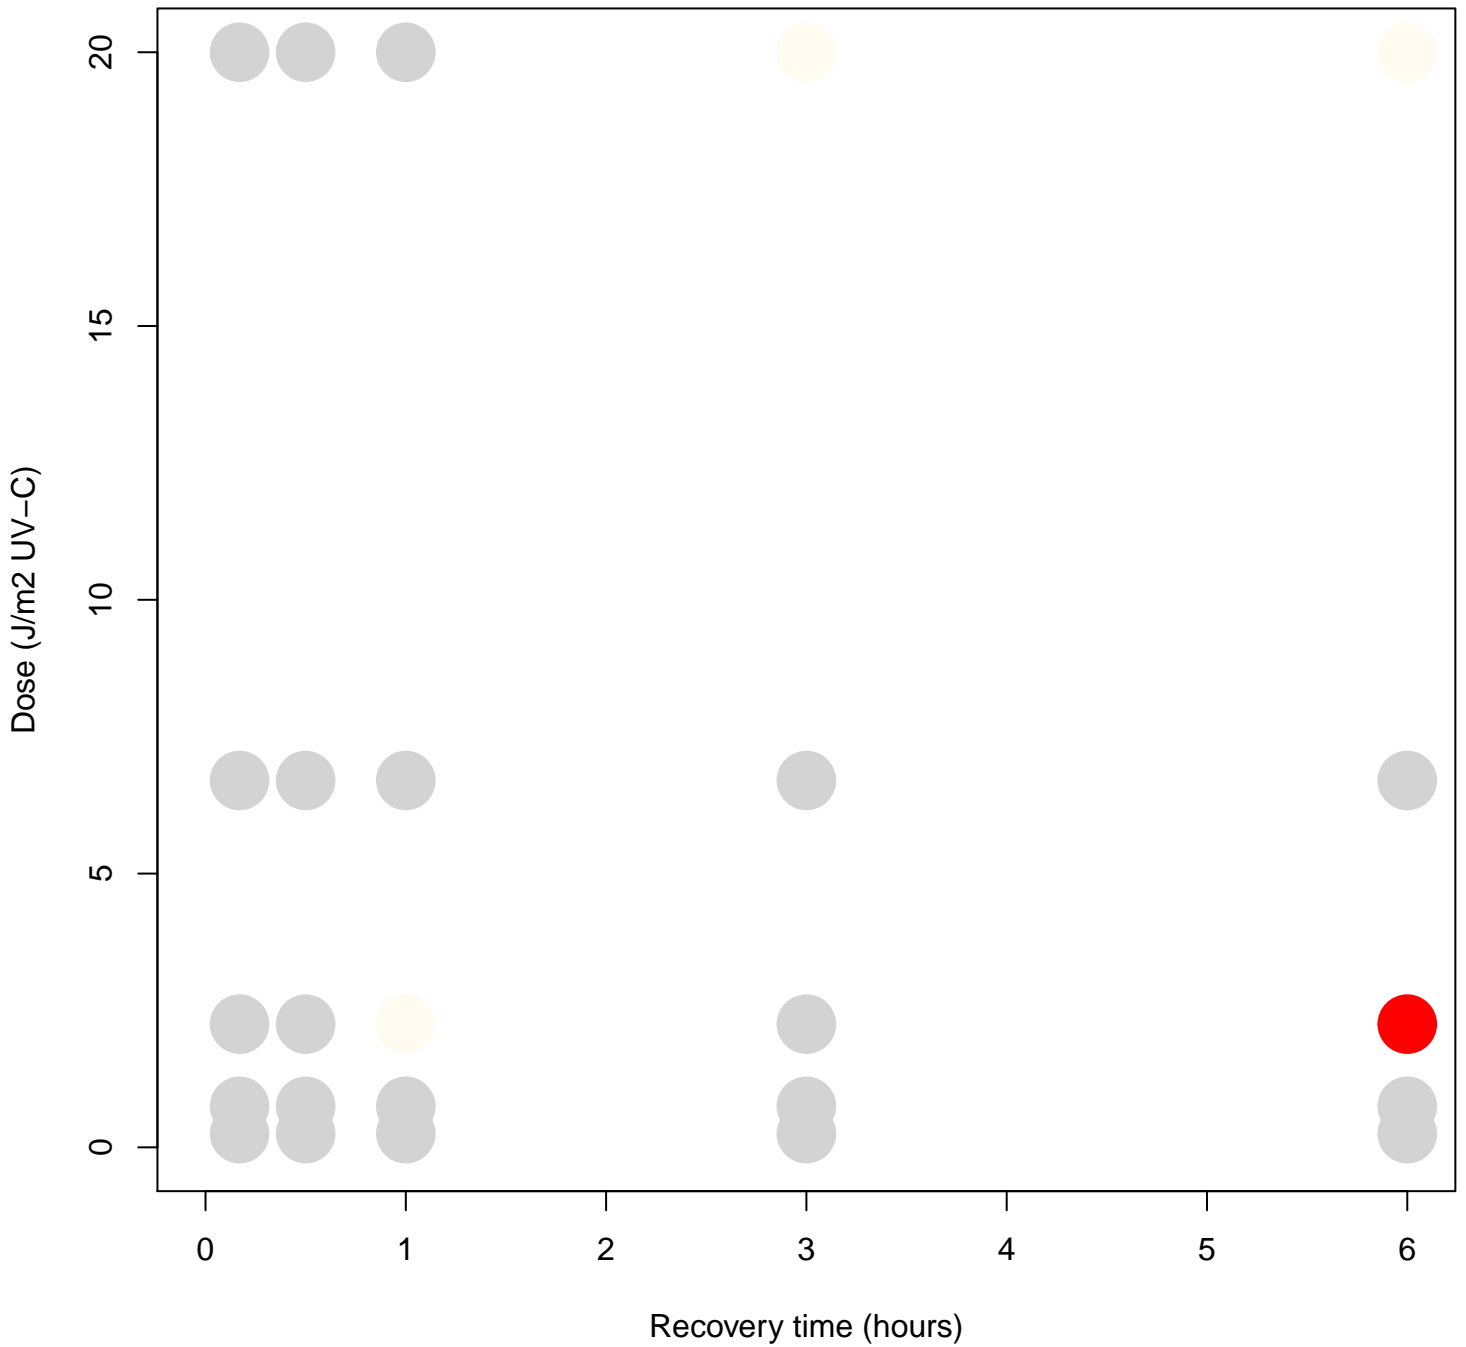

Wei\_s4\_DNA\_repair\_GST\_vs\_0\_in\_time\_FDR

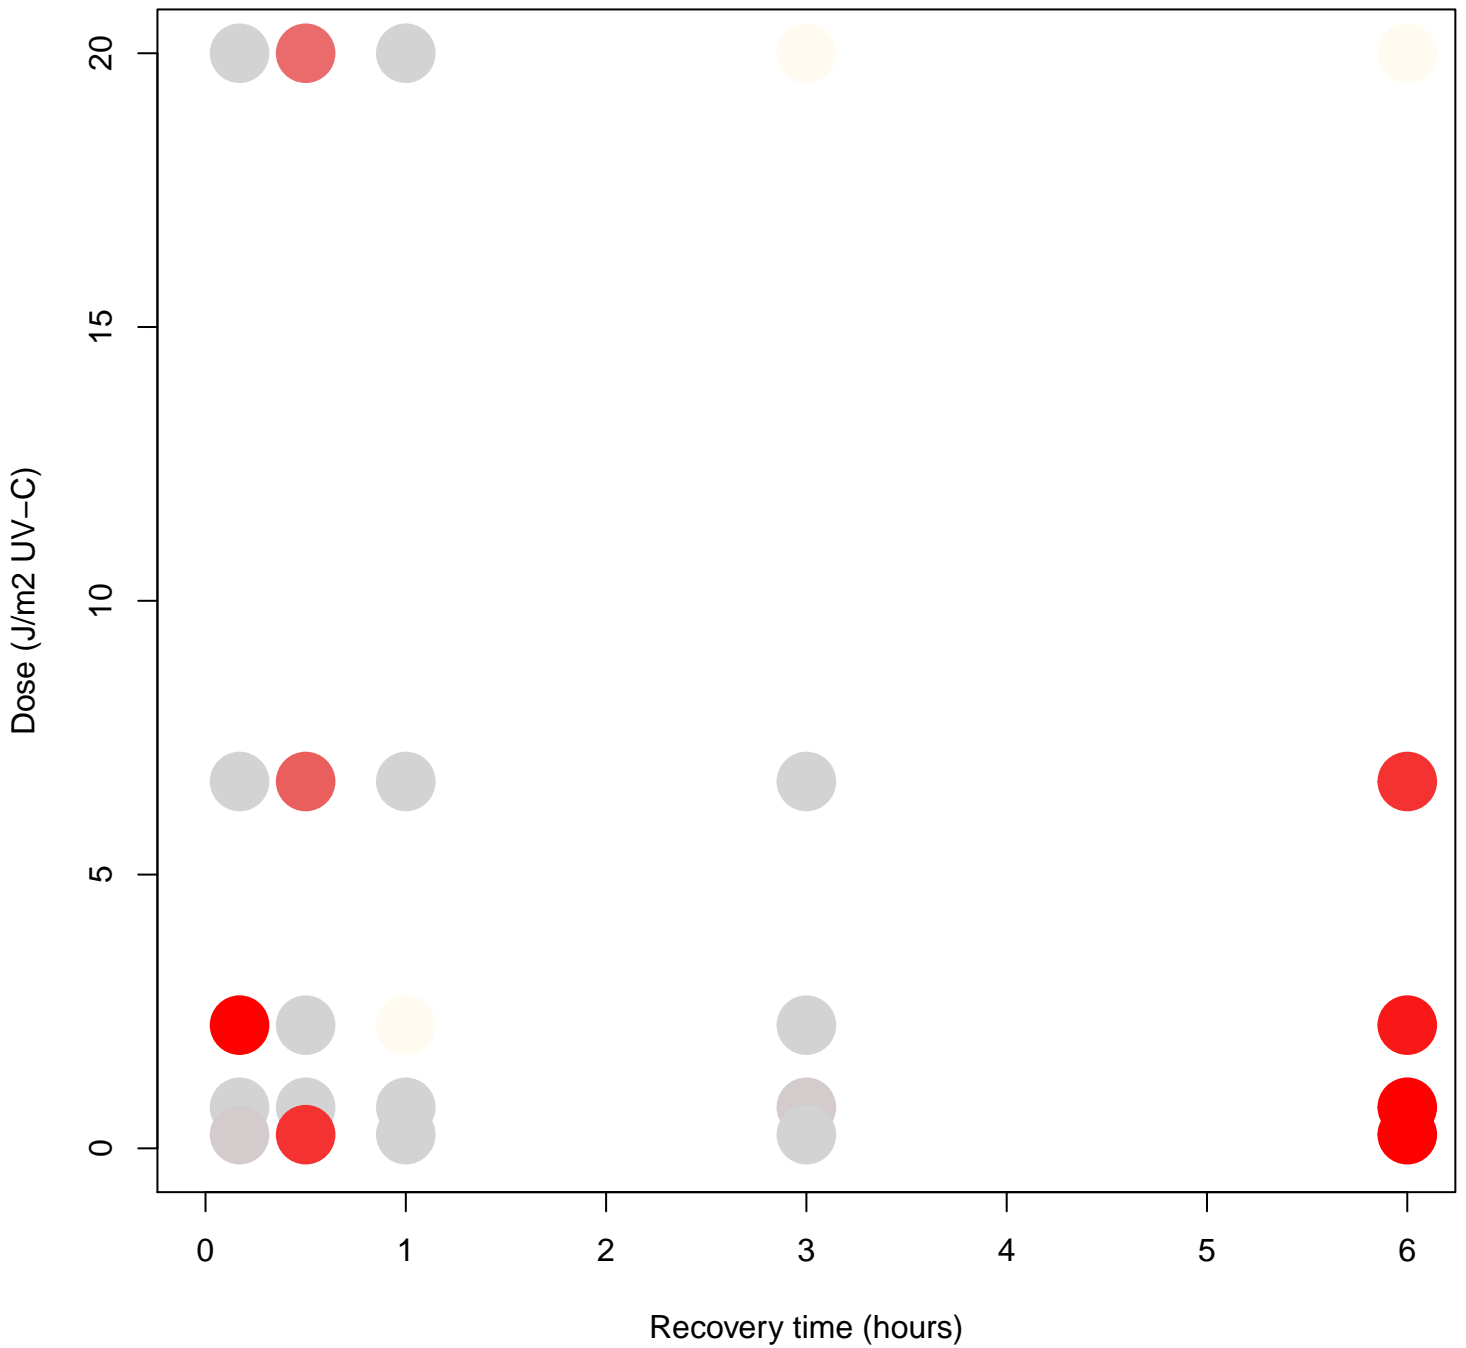

# Wei\_S4\_metabolism\_GST\_vs\_0\_in\_time\_FDR

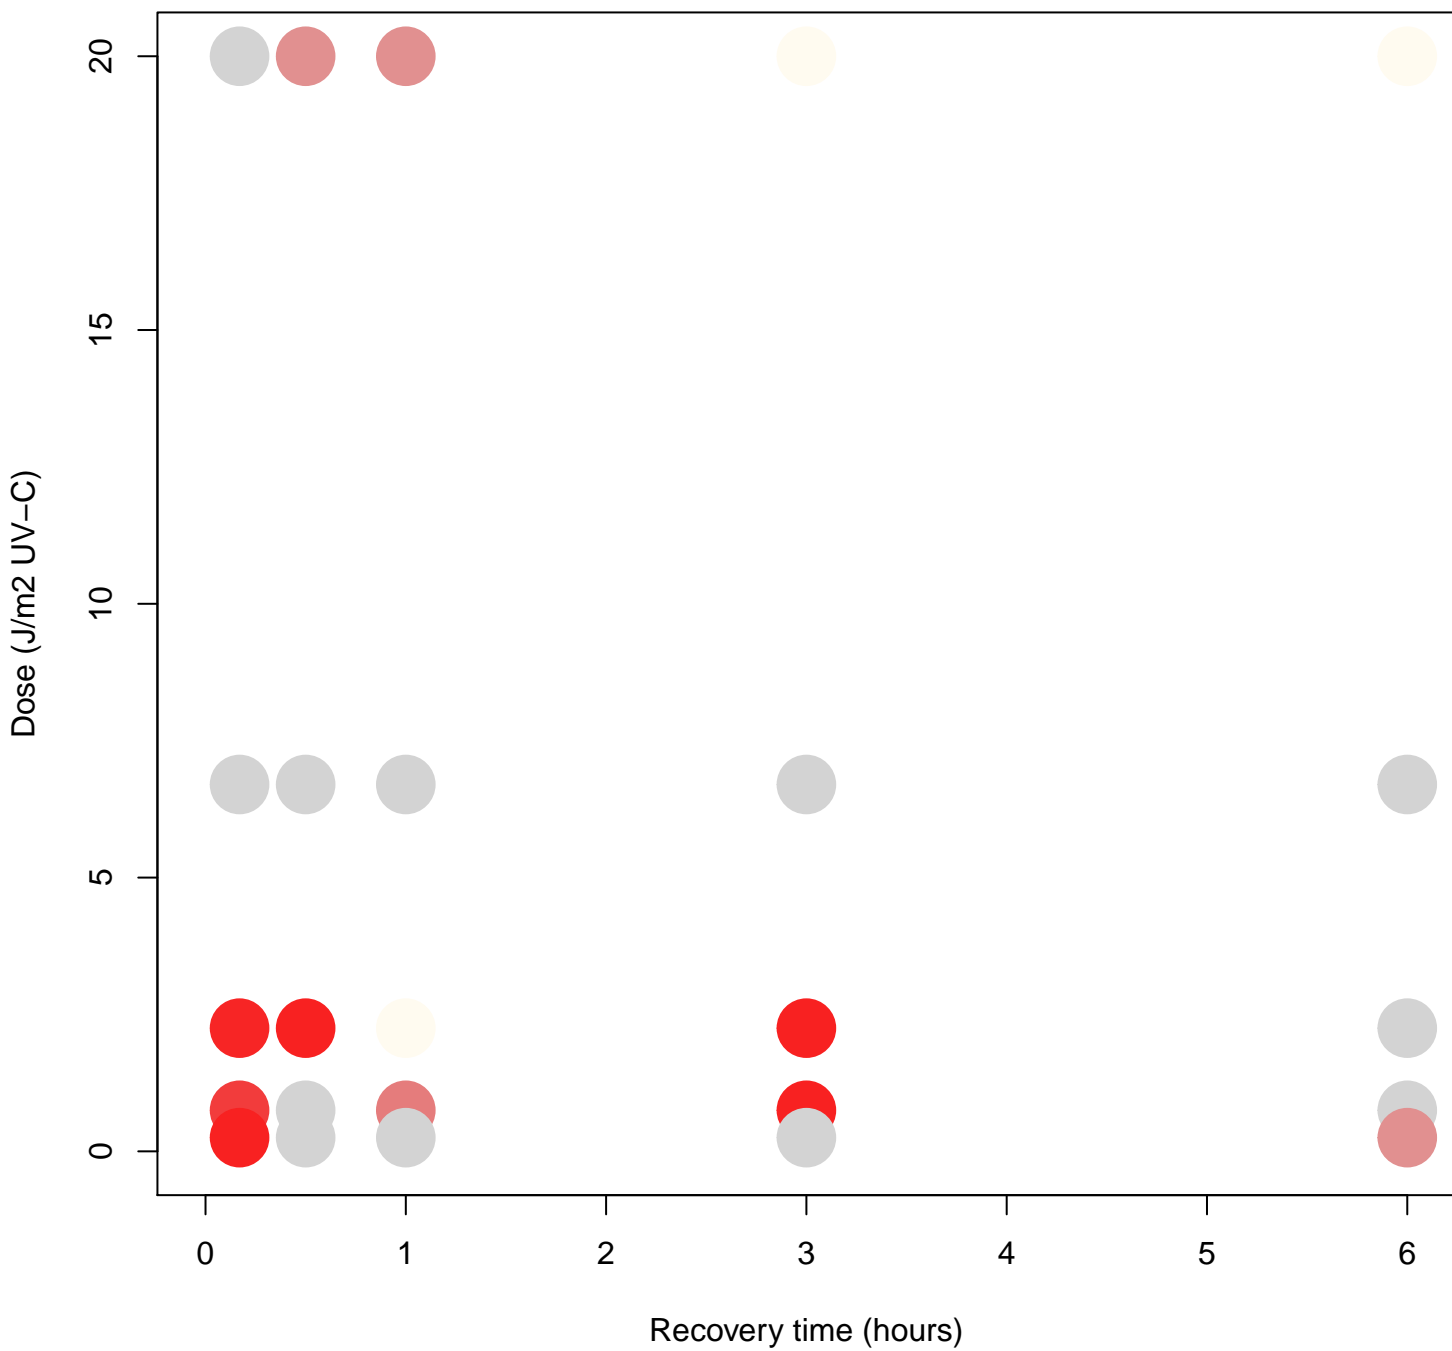

Wei\_S4\_overige\_GST\_vs\_0\_in\_time\_FDR

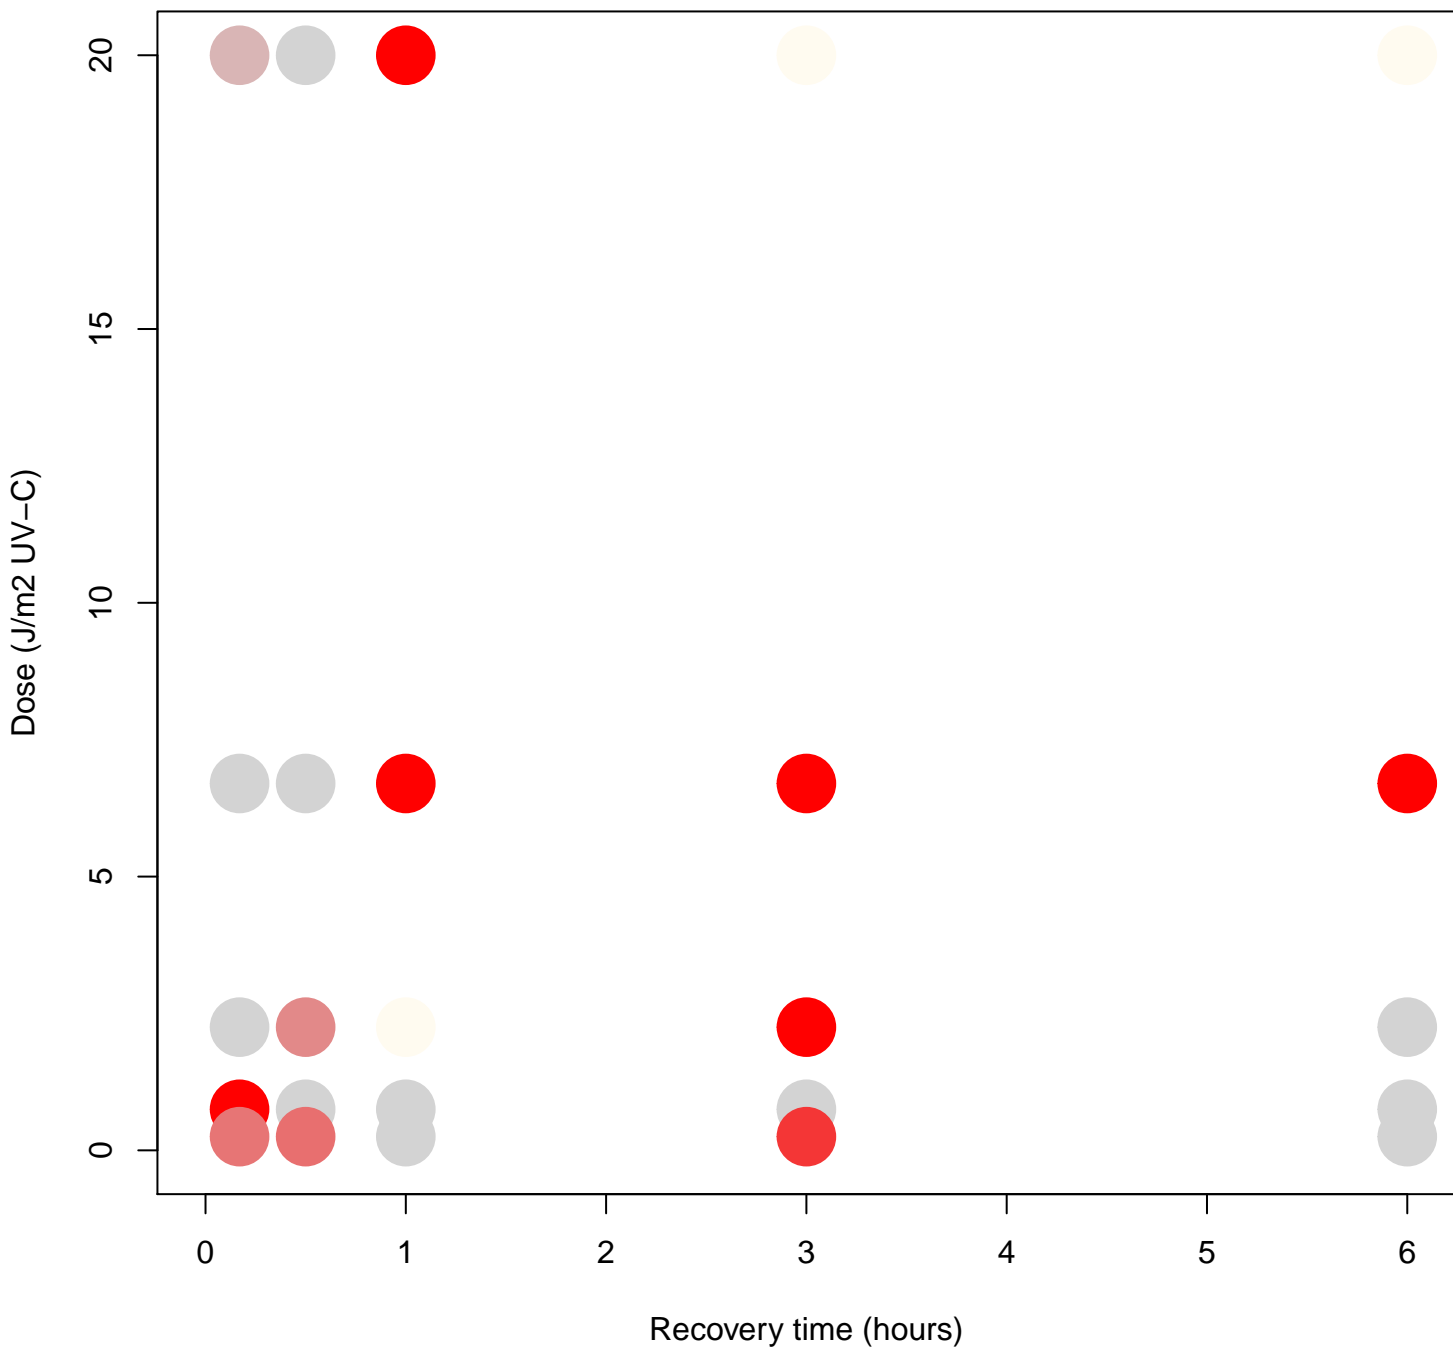



Wei\_S4\_process\_unknown\_GST\_vs\_0\_in\_time\_FDR

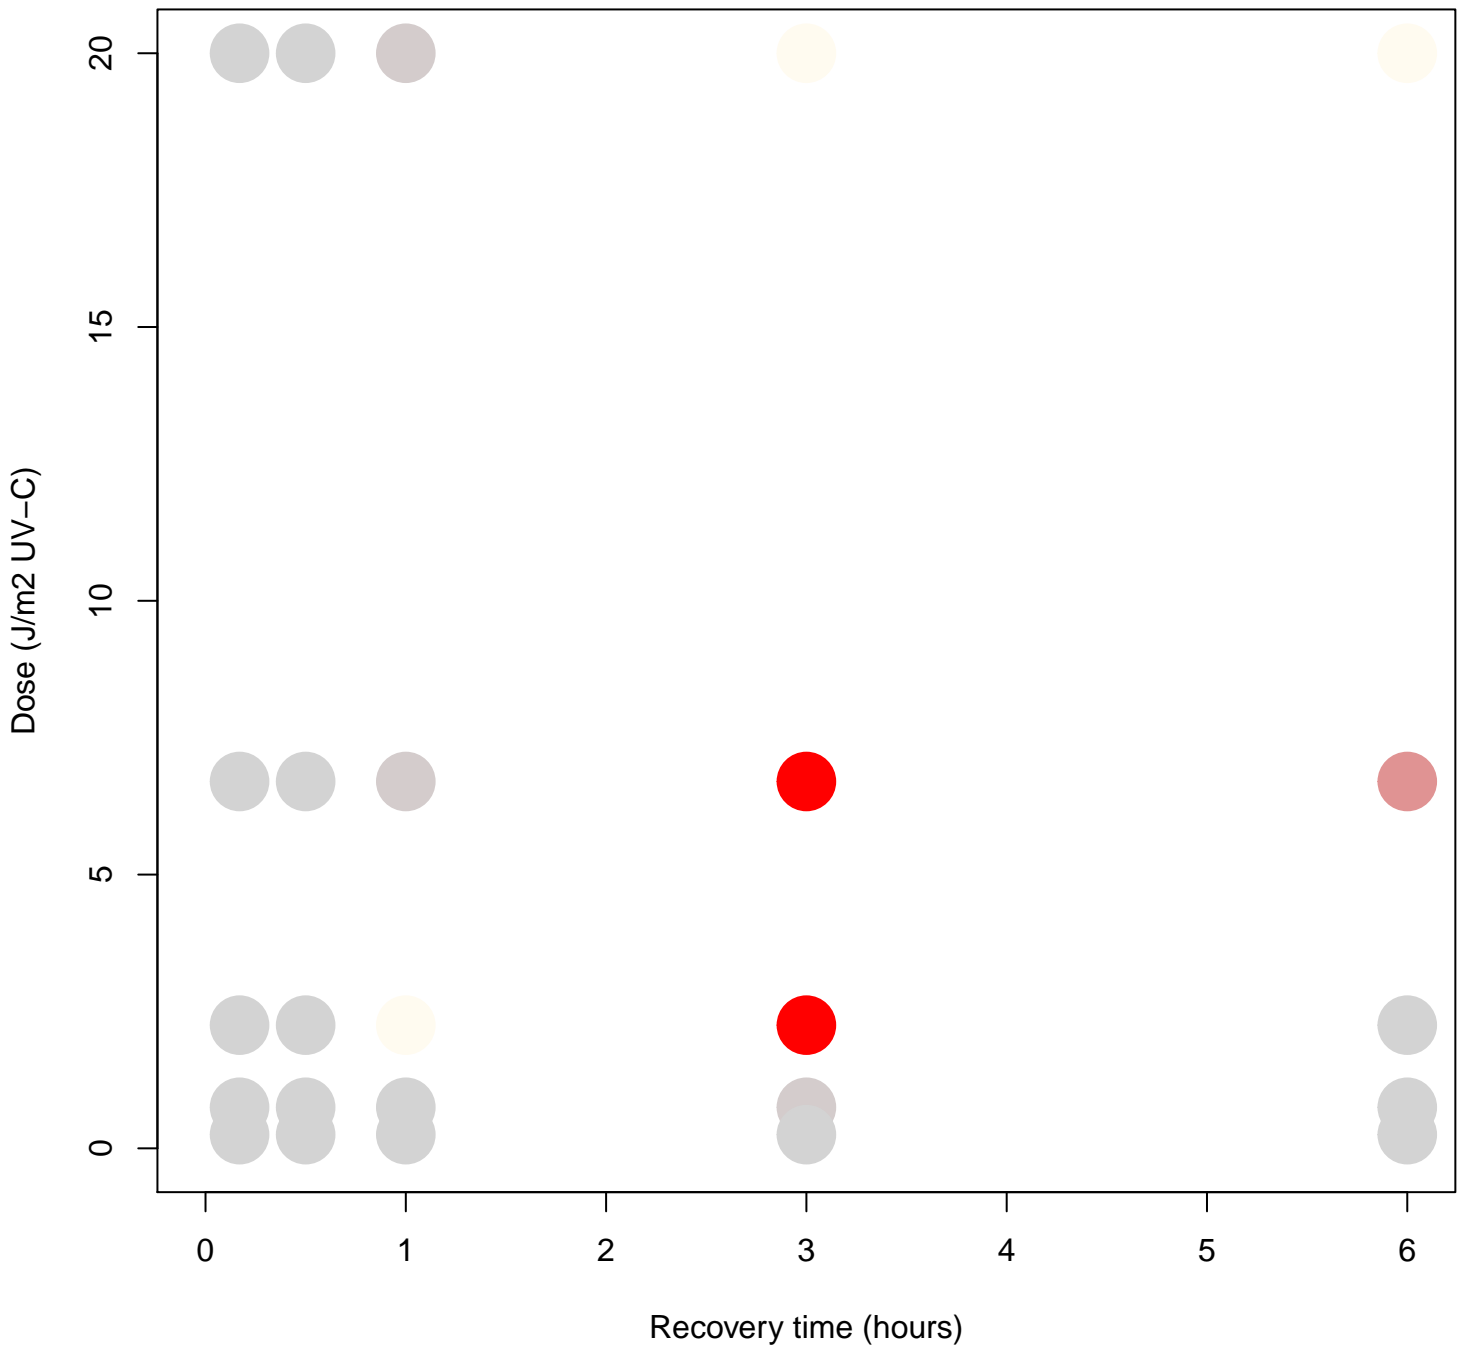

Wei\_s4\_Proliferation\_GST\_vs\_0\_in\_time\_FDR

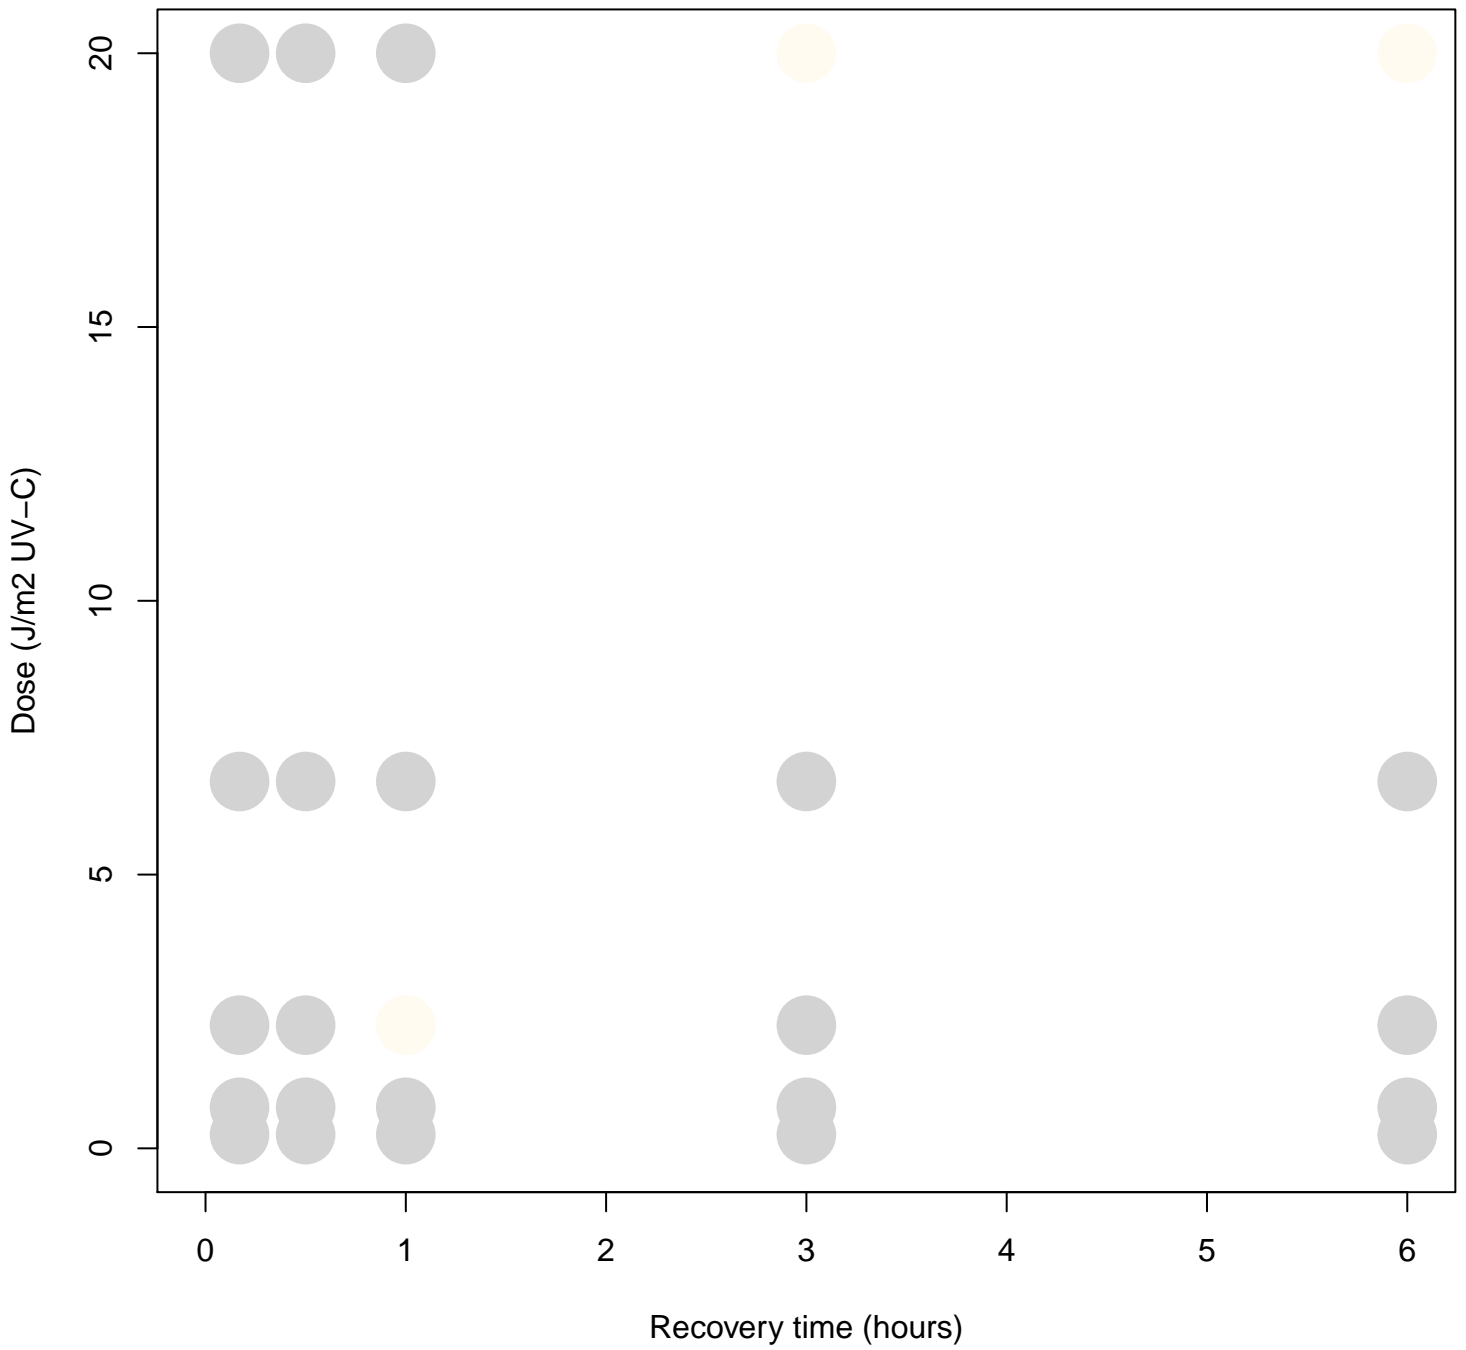

Wei\_S4\_transcriptie\_GST\_vs\_0\_in\_time\_FDR

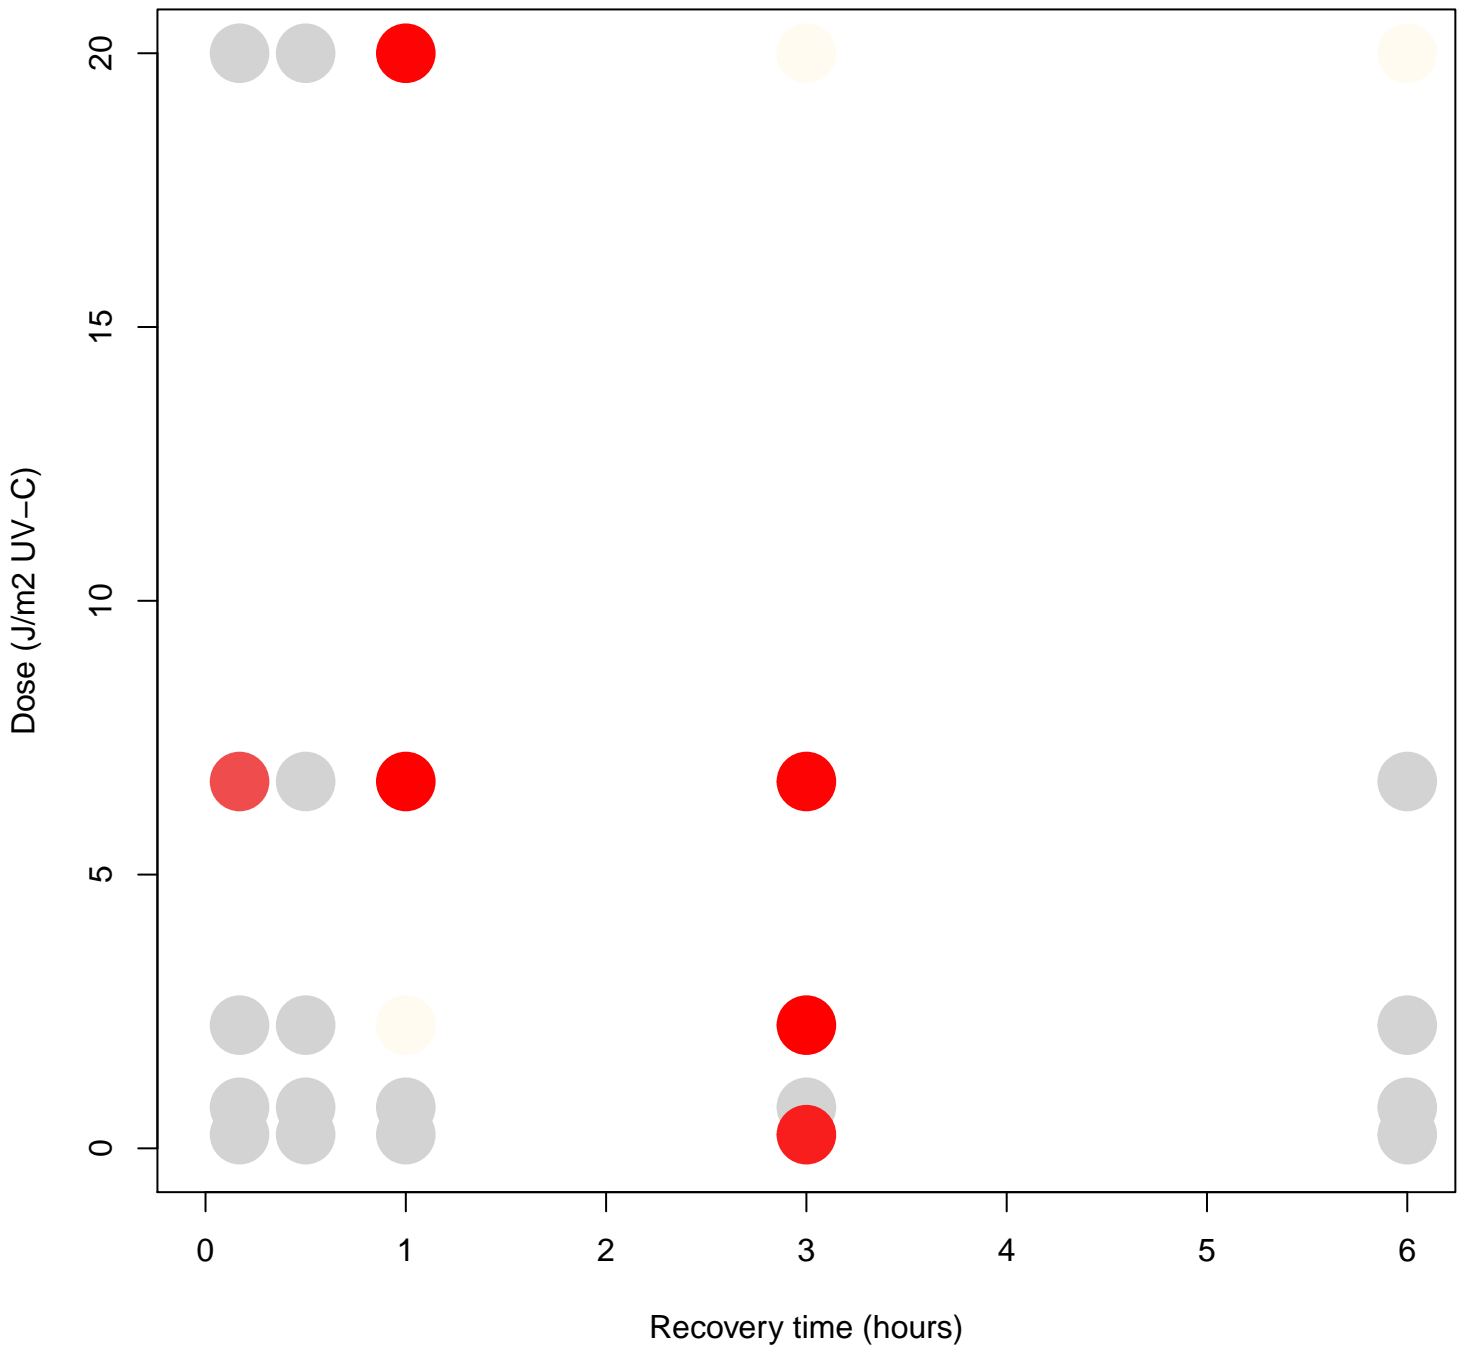

WEI\_Signal\_Transduction\_GST\_vs\_0\_in\_time\_FDR

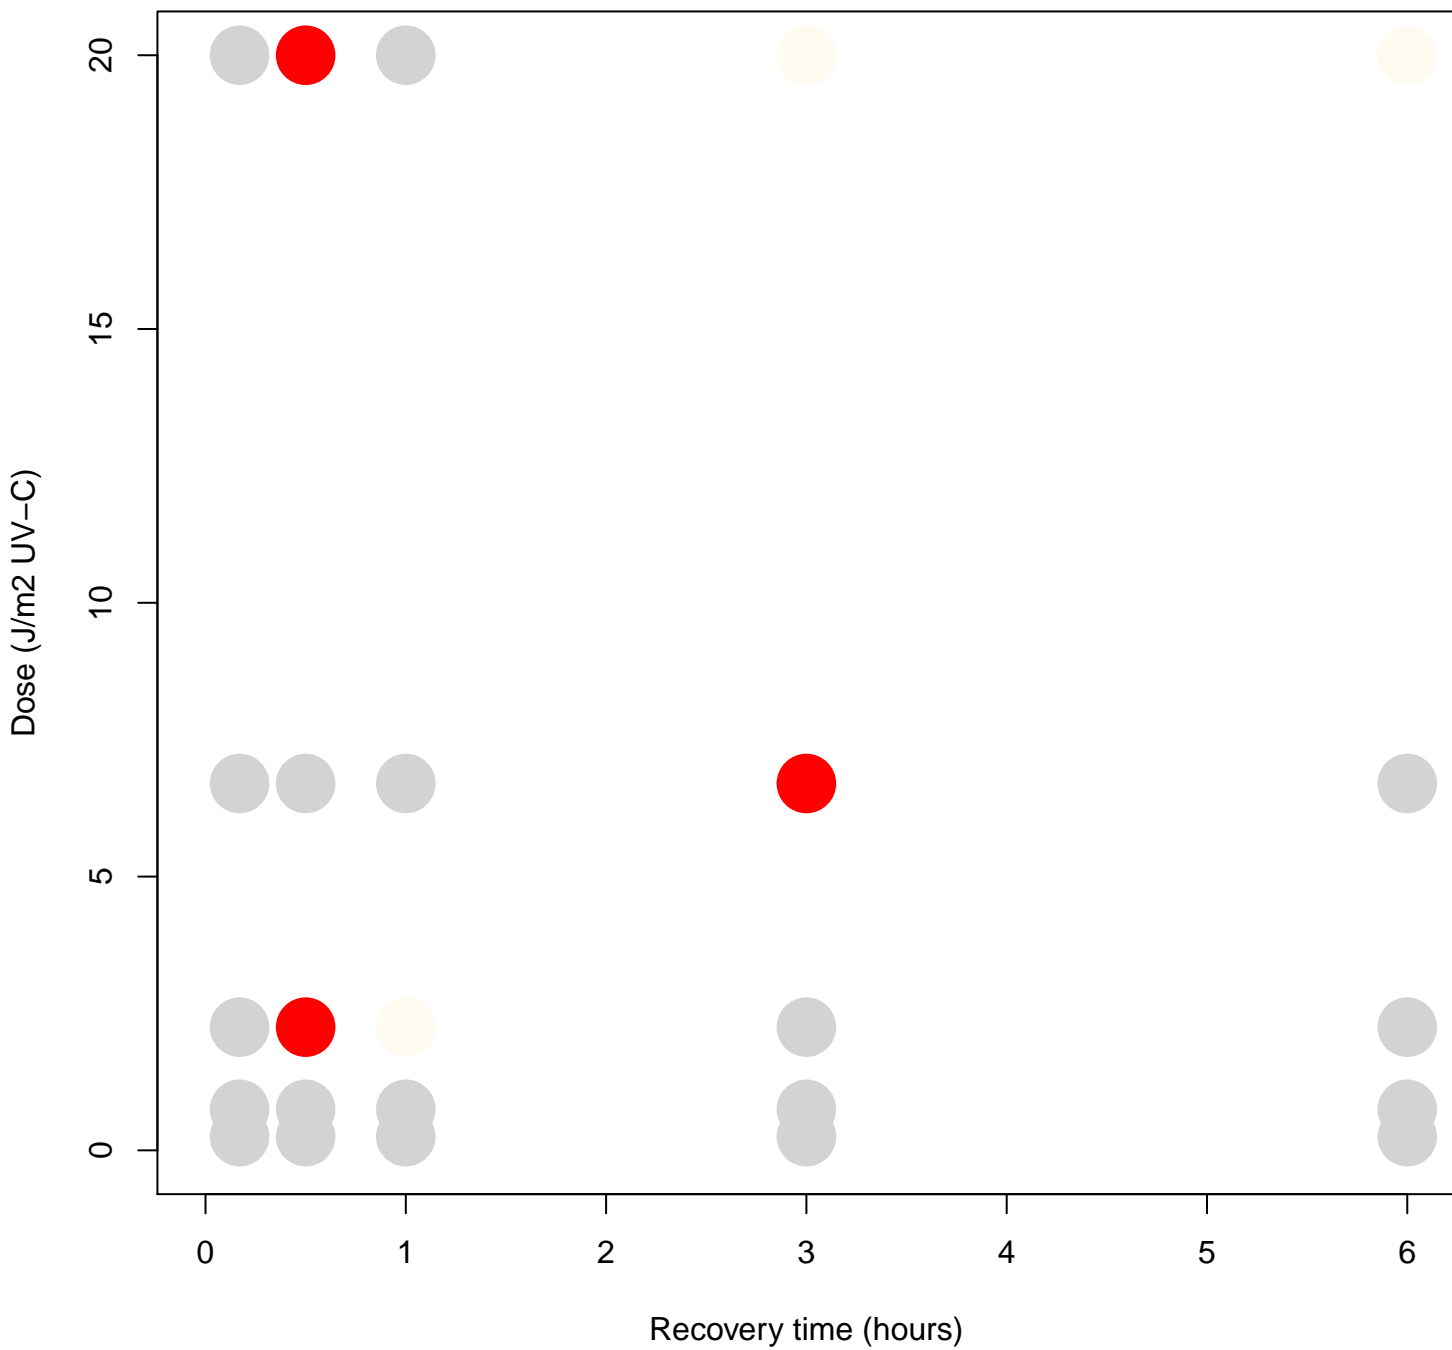

# WEI\_Transcription\_Regulation\_GST\_vs\_0\_in\_time\_FDR

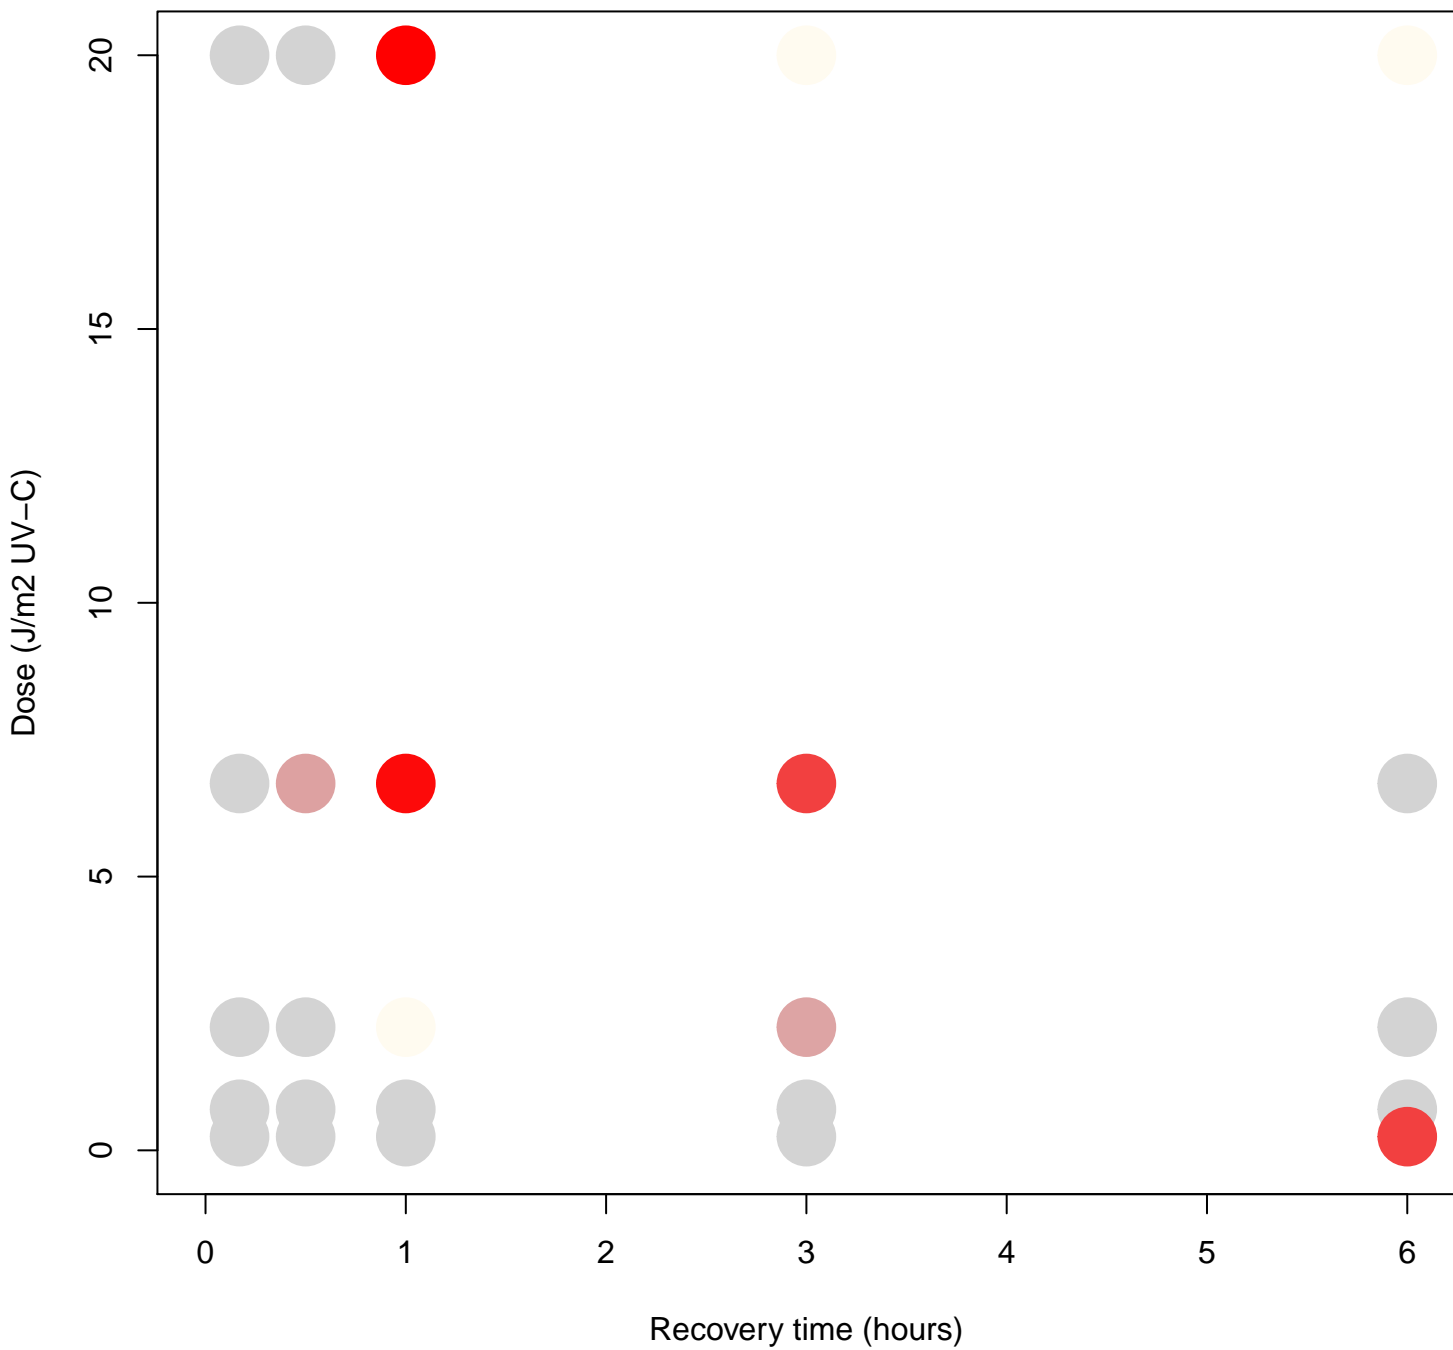

WEI\_Transport\_and\_Ion\_Channel\_GST\_vs\_0\_in\_time\_FDR

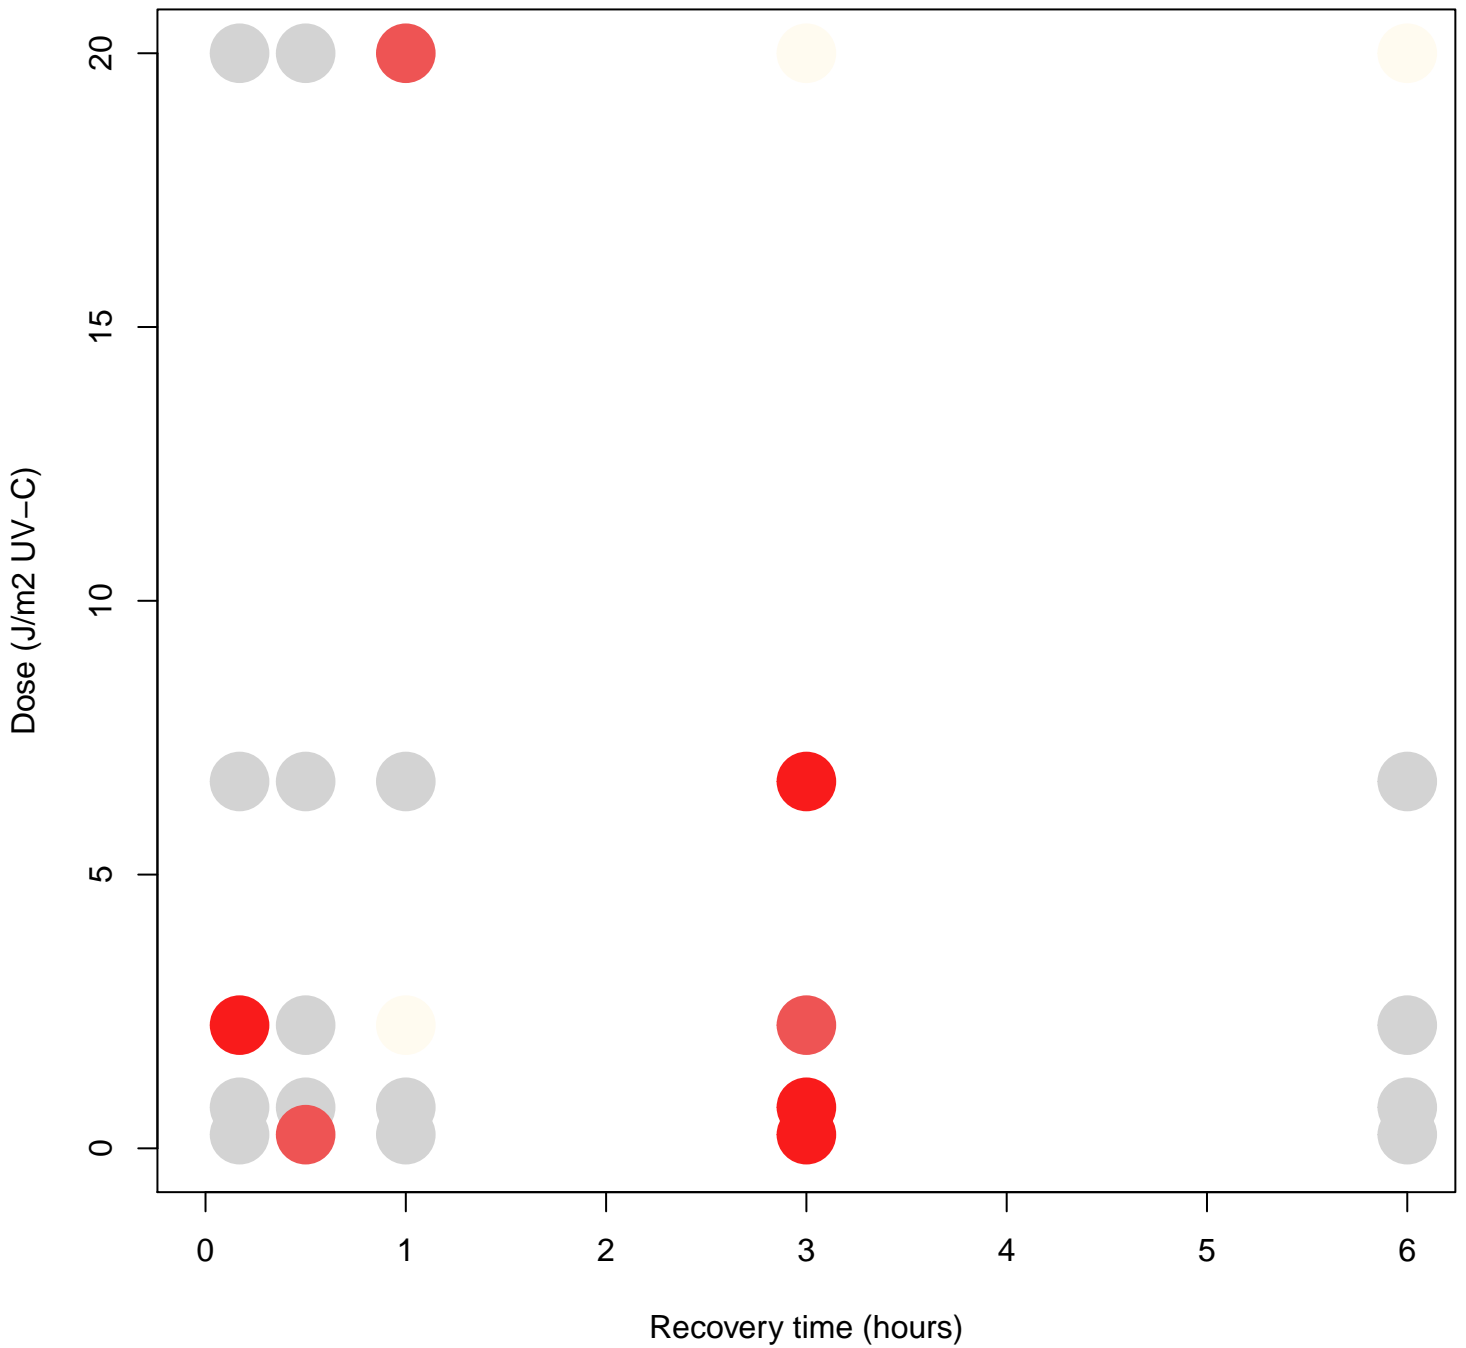

WEI\_Unknown\_GST\_vs\_0\_in\_time\_FDR

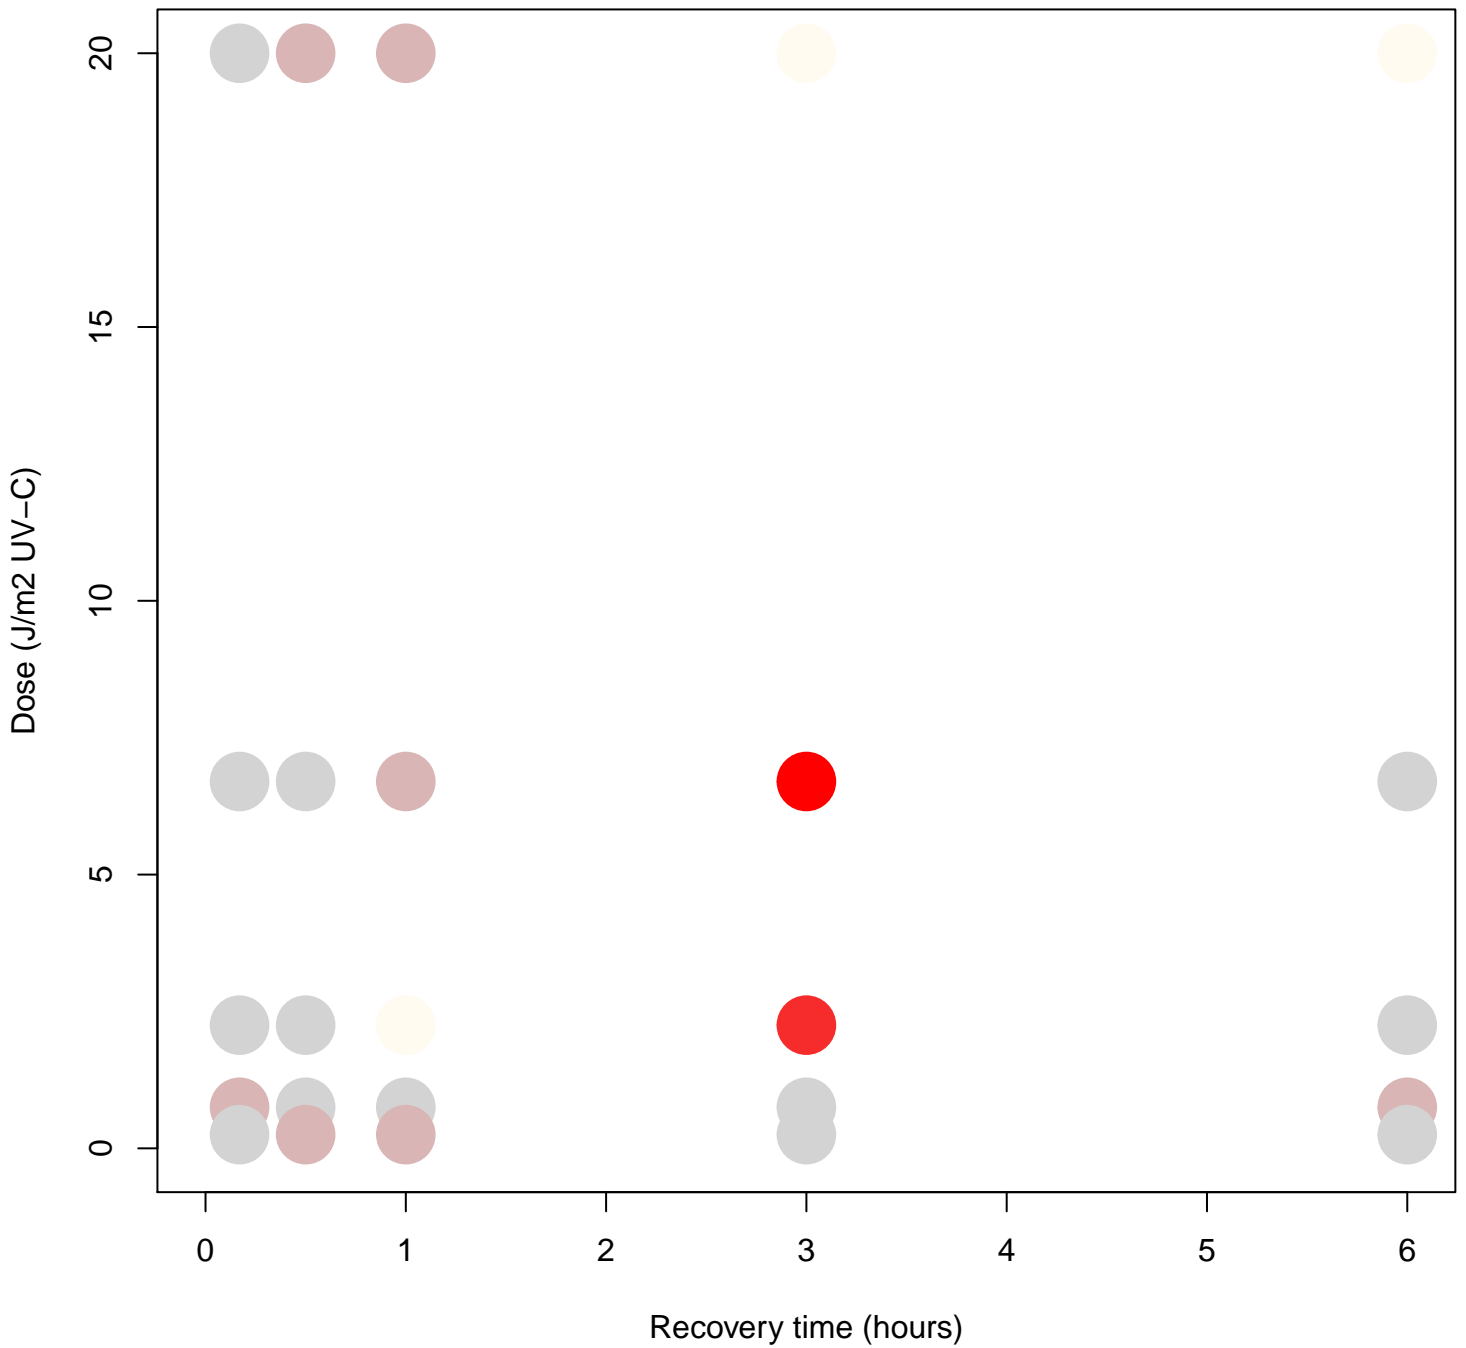

WR\_anti.survival\_GST\_vs\_0\_in\_time\_FDR





# WR\_Apoptosis\_GST\_vs\_0\_in\_time\_FDR

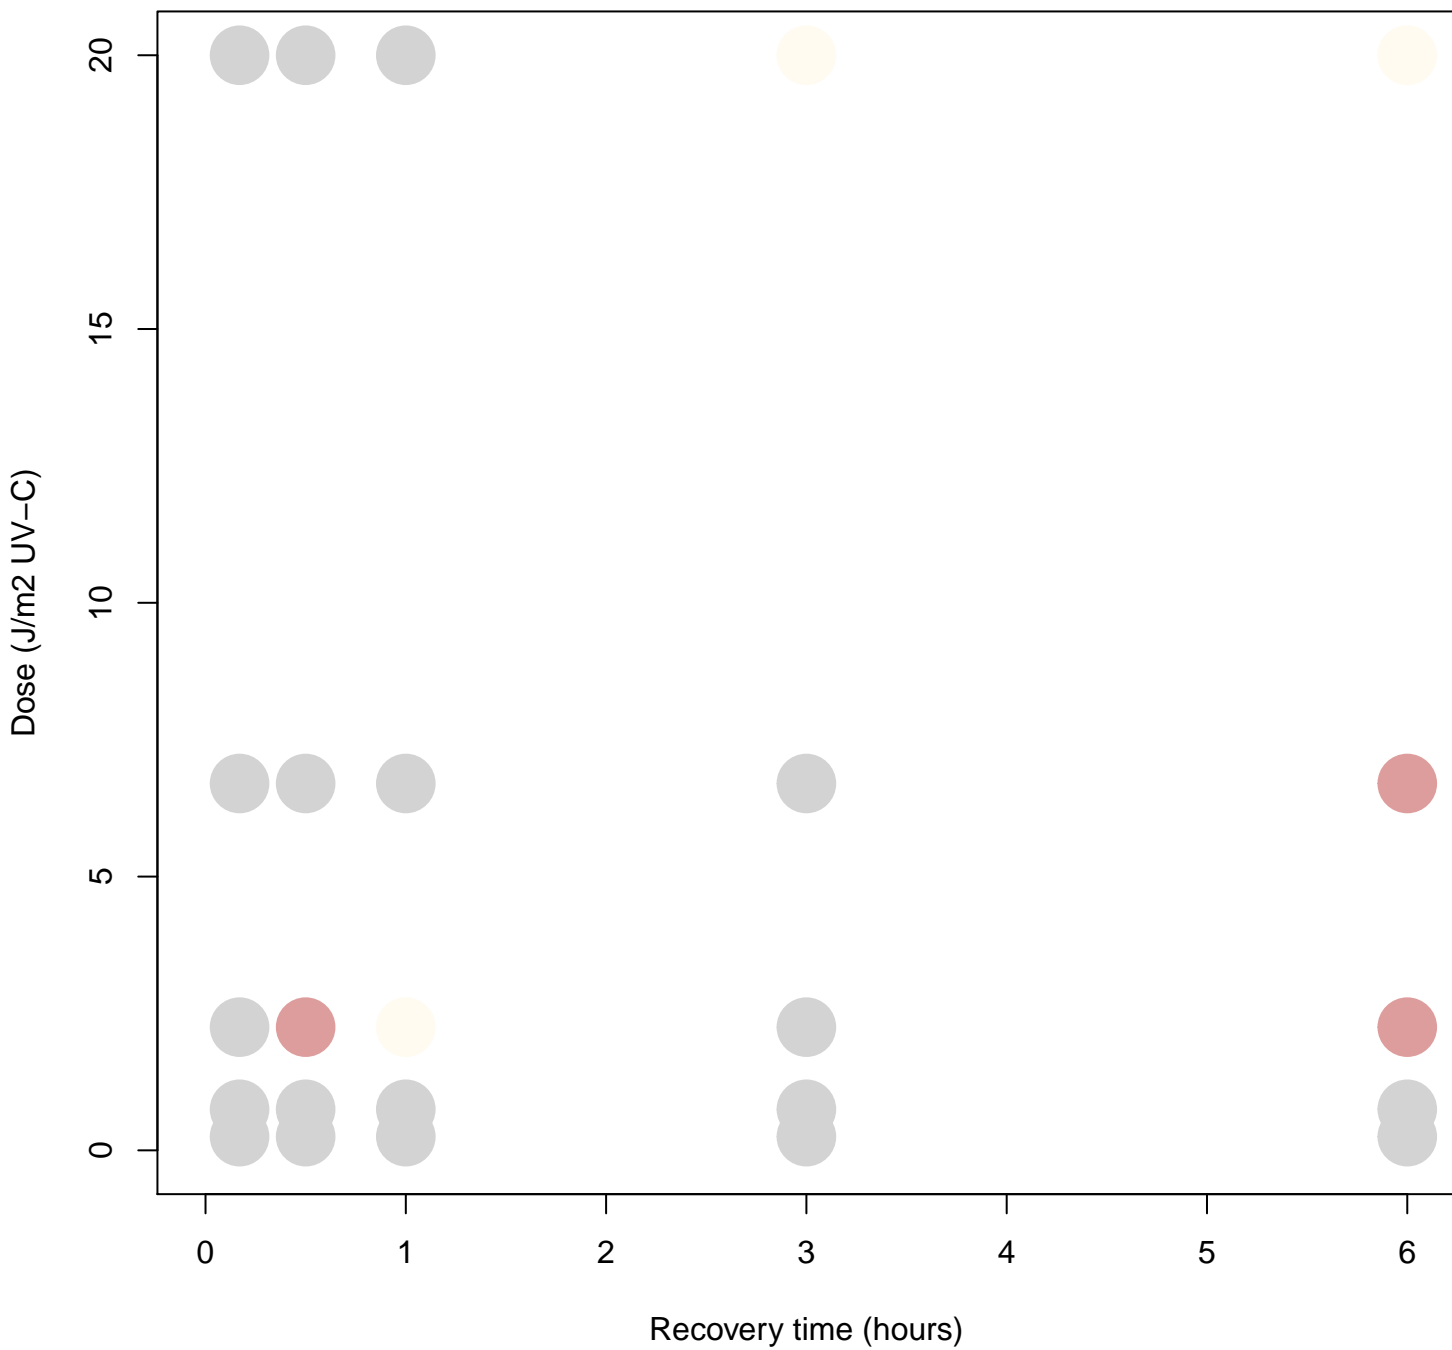

# WR\_Cell\_cycle\_arrest\_GST\_vs\_0\_in\_time\_FDR



# WR\_DNA\_repair\_GST\_vs\_0\_in\_time\_FDR

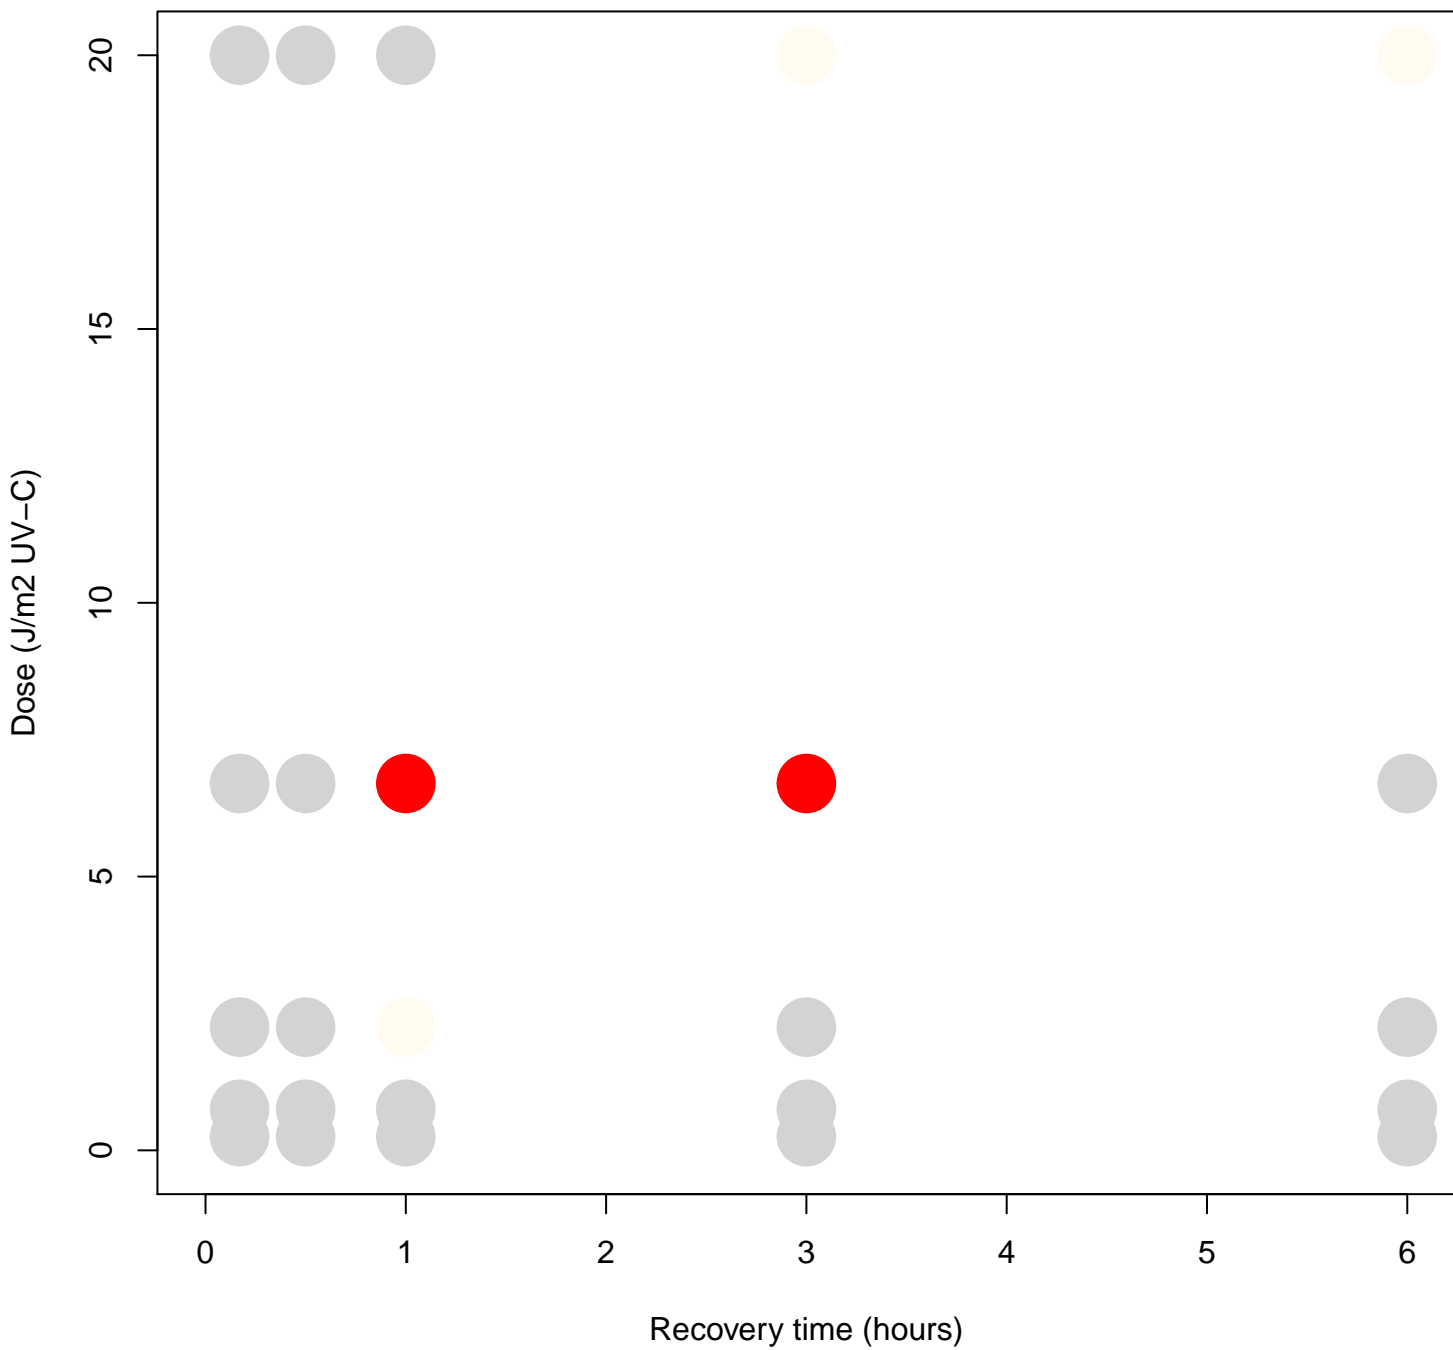

# X3410\_base\_excision\_repair\_GST\_vs\_0\_in\_time\_FDR

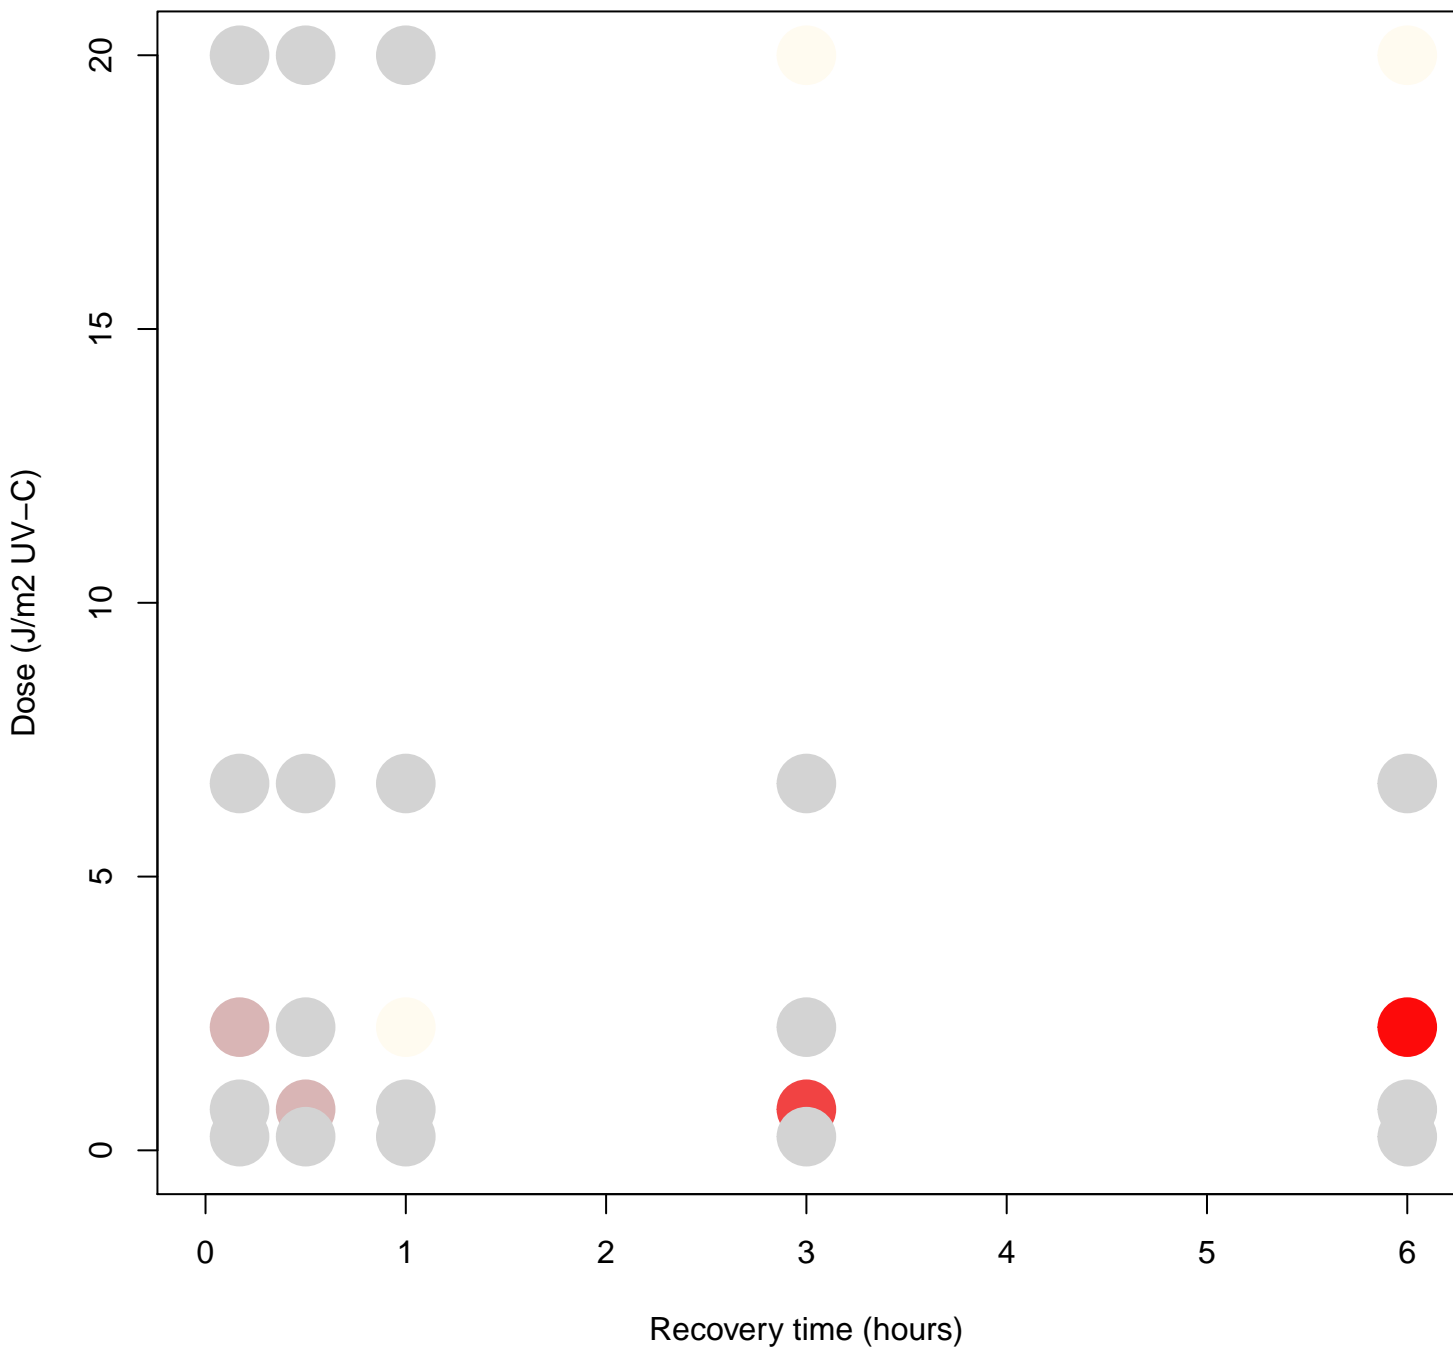

# X3430\_Mismatch\_repair\_GST\_vs\_0\_in\_time\_FDR



# X4110\_cell\_cycle\_GST\_vs\_0\_in\_time\_FDR

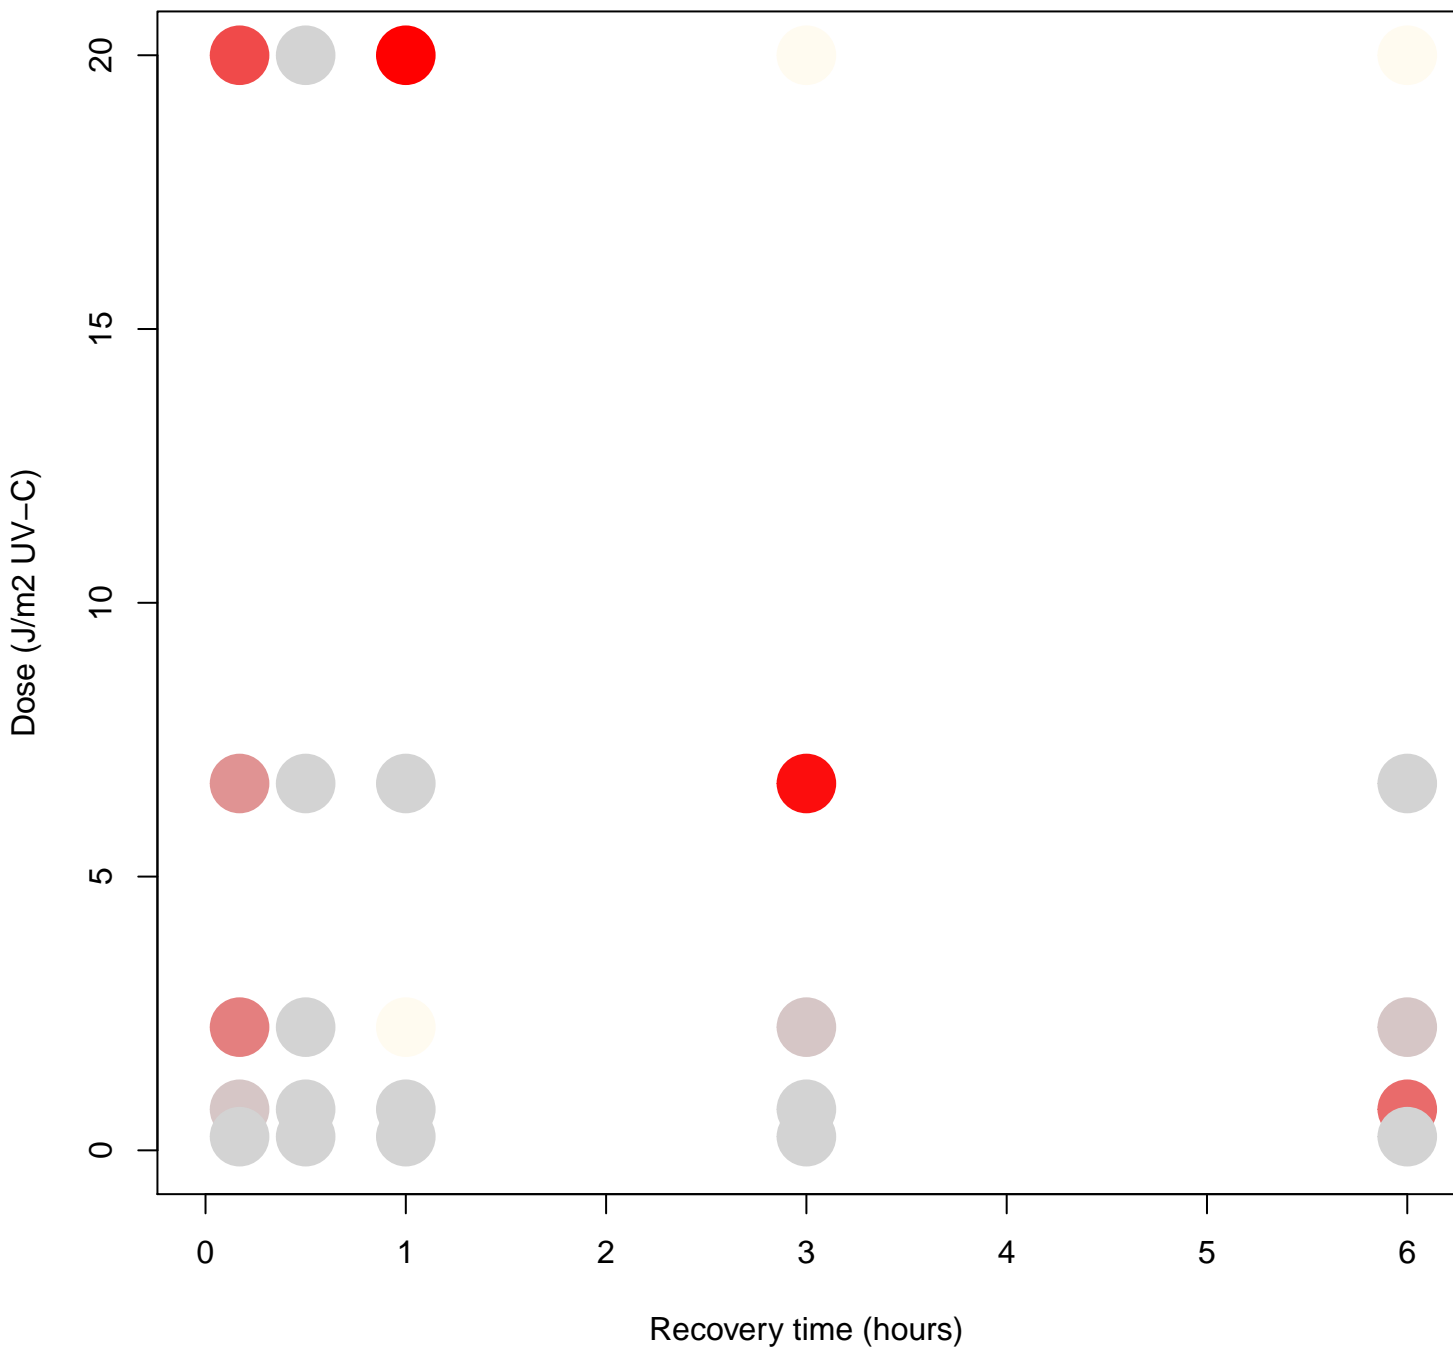

# X4115\_p53\_signaling\_pathway\_GST\_vs\_0\_in\_time\_FDR

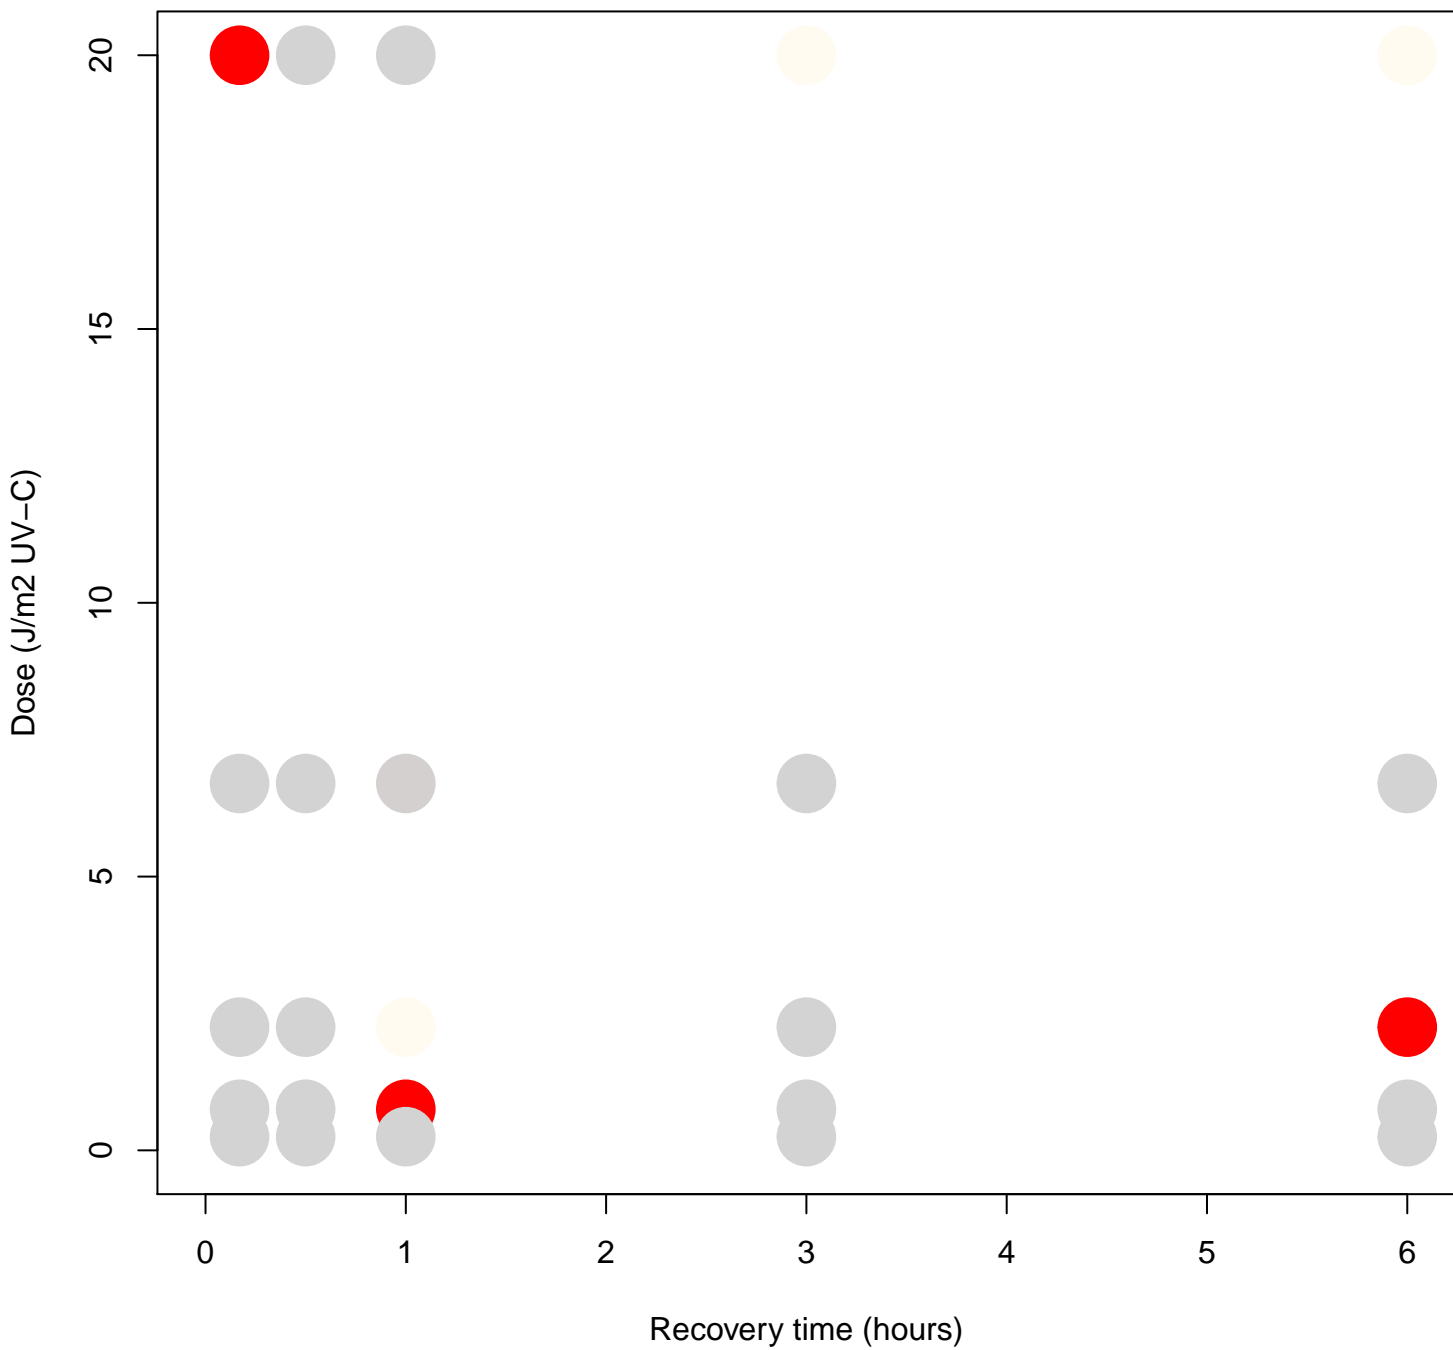

# X4210\_extrinsic\_apoptosis\_GST\_vs\_0\_in\_time\_FDR

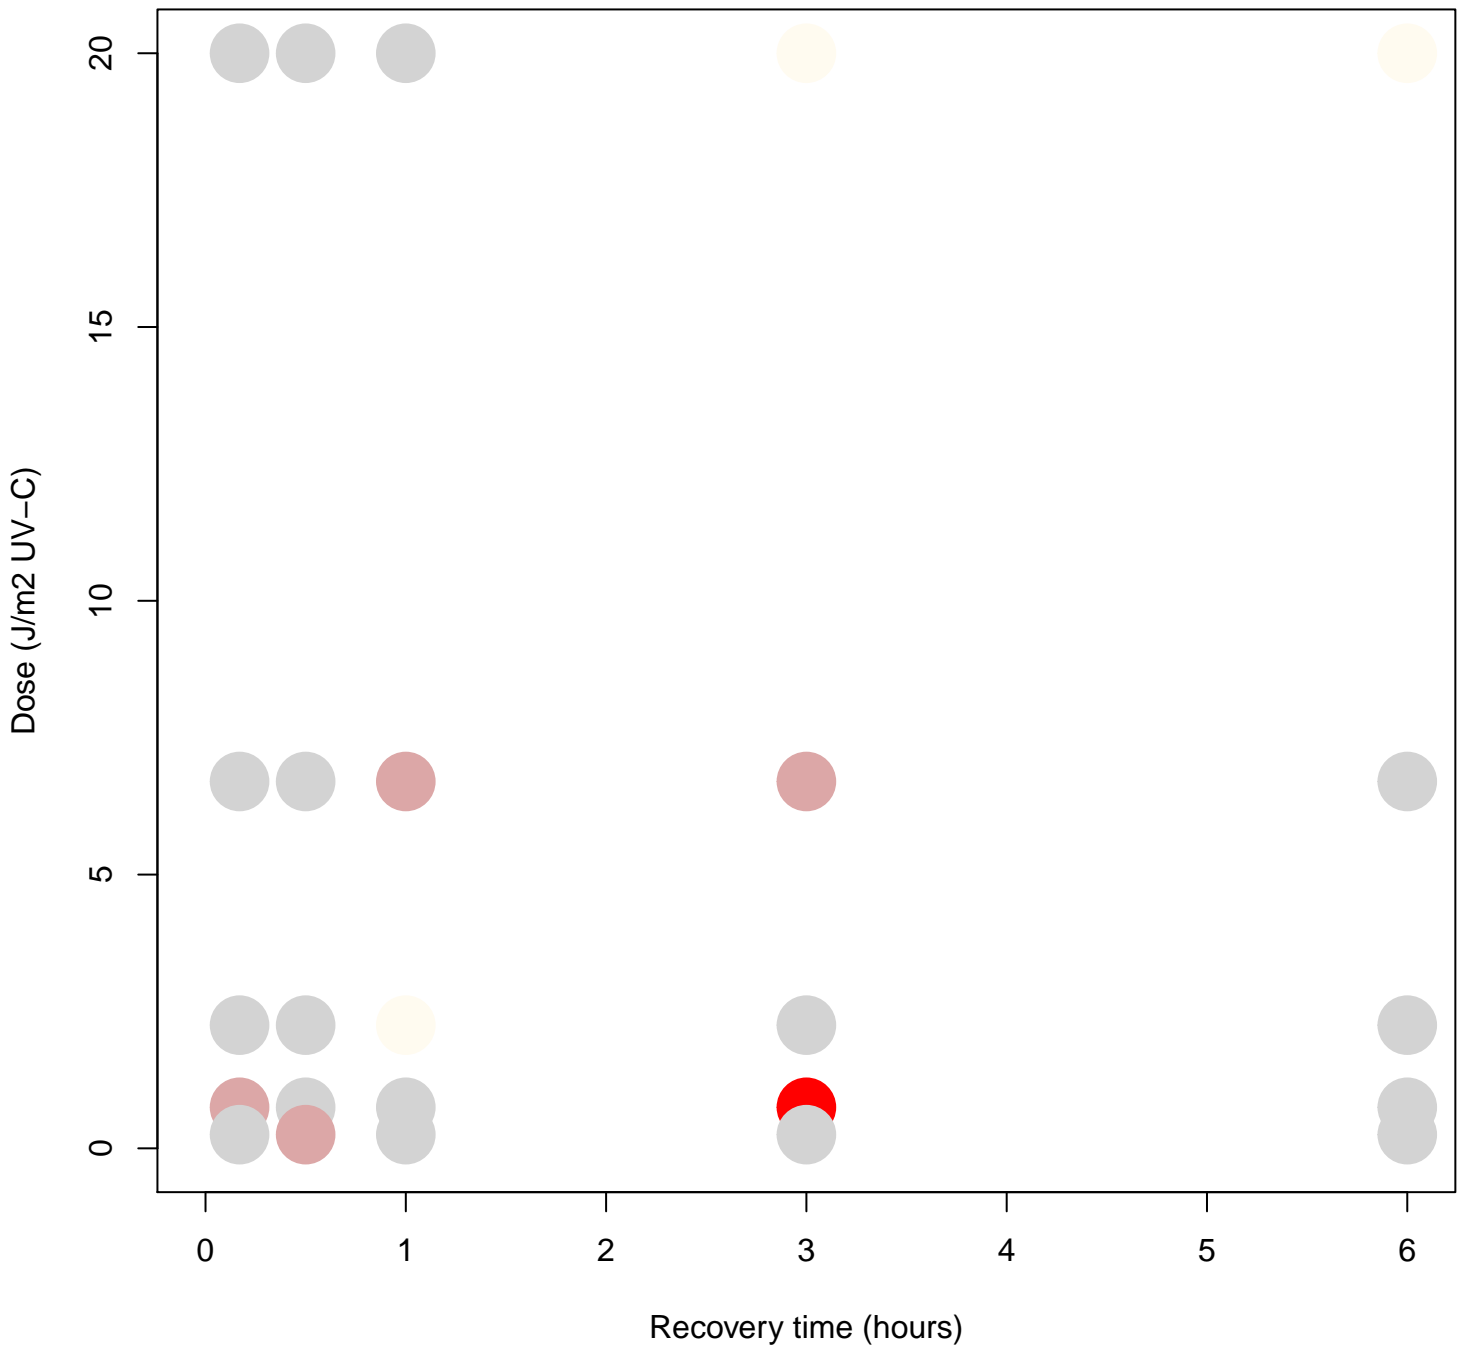



# X4210\_intrinsic\_apoptosis\_GST\_vs\_0\_in\_time\_FDR

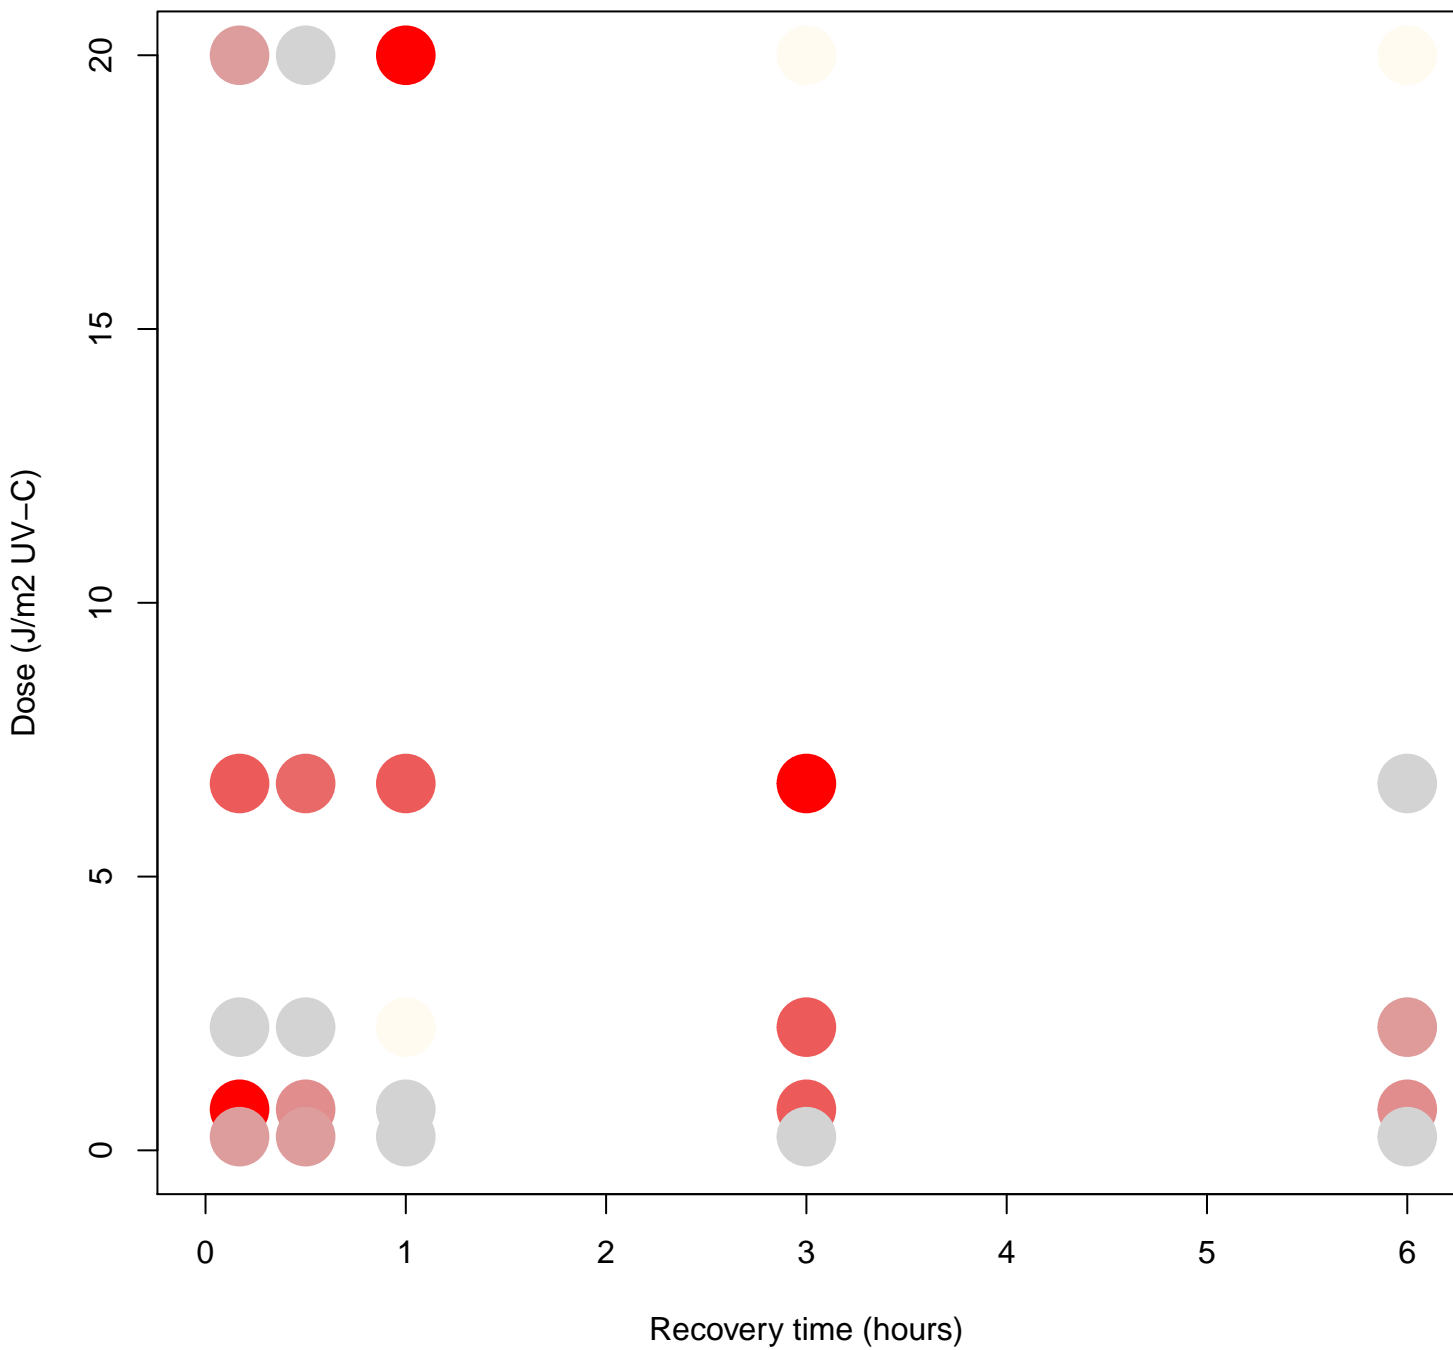

Supplement: pone.0097089.s003.pdf [file pone.0097089.s003.pdf]
