# Supplementary material for: A Range Finding Protocol to Support Design for Transcriptomics Experimentation: Examples of In-Vitro and In-Vivo Murine UV Exposure
Source: PubMed Central journal article supplement (PMC4019648; doi:10.1371/journal.pone.0097089), 2014-05-13

Figure S1. Effect of UV exposure on mRNA yield

Relative mRNA yields for all *in-vitro* (A) and *in-vivo* (B) experimental samples compared to the mRNA yield of the t=0 sample in each experiment. The RNA yields from a previous *in-vitro* UV exposure experiment are presented as reference (A).

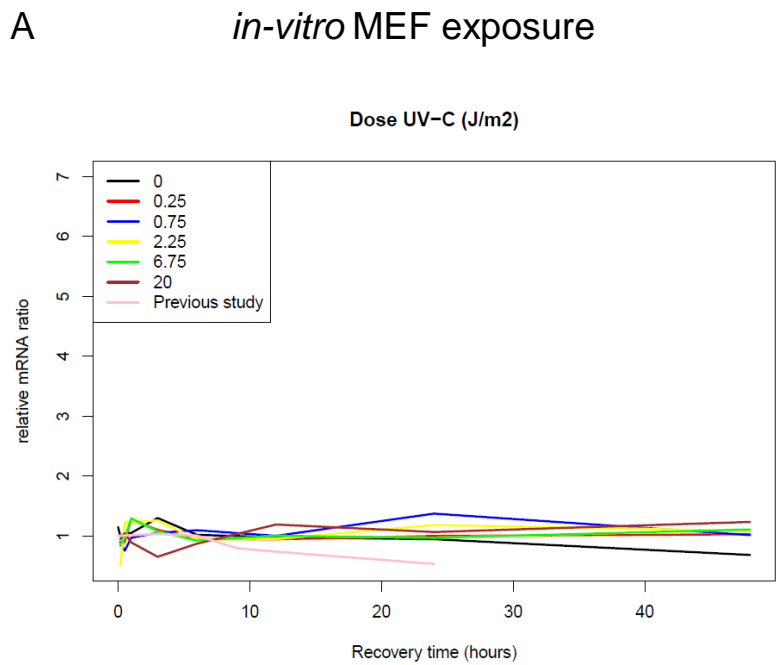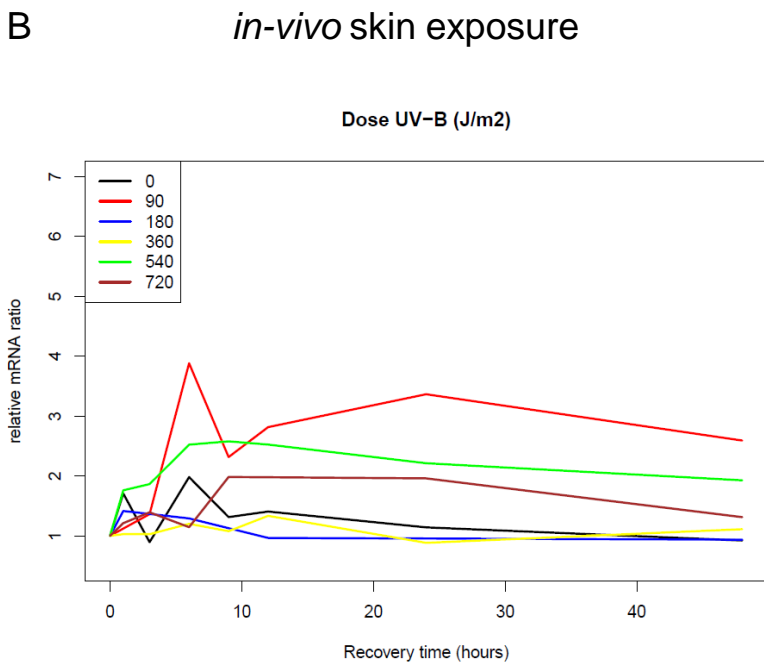

Supplement: pone.0097089.s001.pdf [file pone.0097089.s001.pdf]
