# Supplementary material for: A Range Finding Protocol to Support Design for Transcriptomics Experimentation: Examples of In-Vitro and In-Vivo Murine UV Exposure
Source: PubMed Central journal article supplement (PMC4019648; doi:10.1371/journal.pone.0097089), 2014-05-13

Figure S2. Number of differentially expressed genes over time

Profile plots over time of the number of DEGs for each dose in both experiments (See also Table S2).

*In-vitro MEF exposure*

*In-vivo skin exposure*

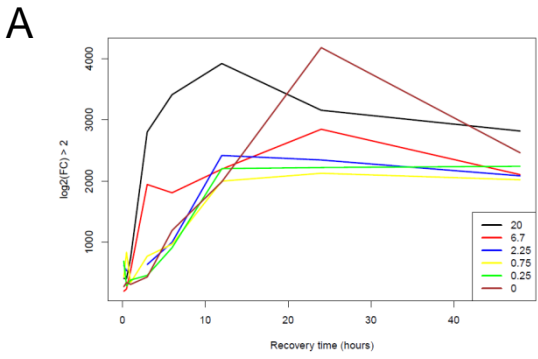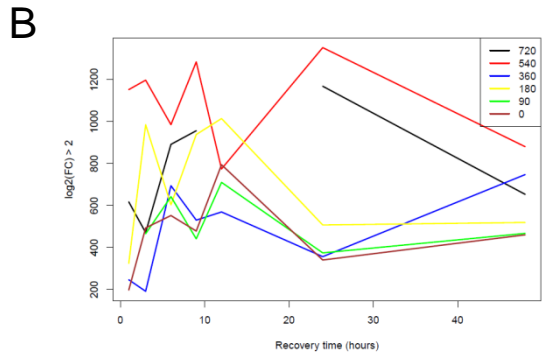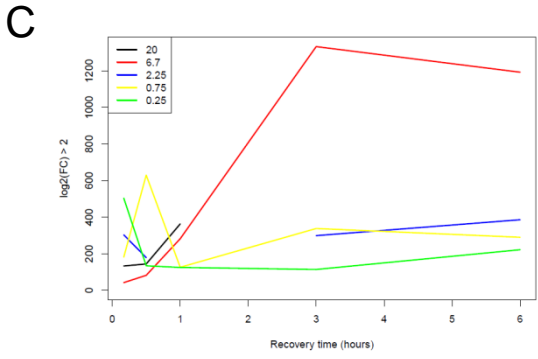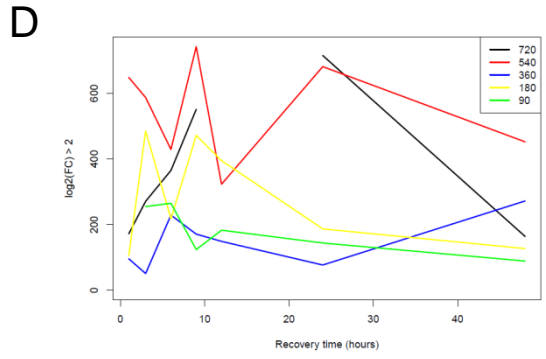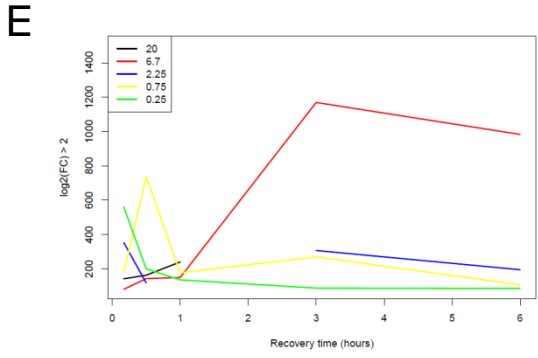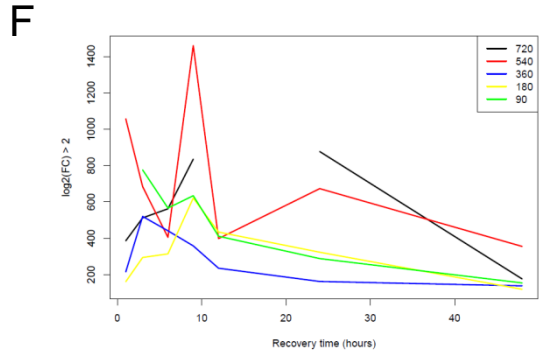

Supplement: pone.0097089.s002.pdf [file pone.0097089.s002.pdf]
