# Supplementary material for: A Range Finding Protocol to Support Design for Transcriptomics Experimentation: Examples of In-Vitro and In-Vivo Murine UV Exposure
Source: PubMed Central journal article supplement (PMC4019648; doi:10.1371/journal.pone.0097089), 2014-05-13
Supplement: pone.0097089.s005.pdf [file pone.0097089.s005.pdf]

Table S1. RNA isolation metrics

Detailed RNA sample information for the *in-vitro* experiment (A) and the *in-vivo* experiment (B).

| A<br><i>In-vitro</i> MEF exposure |                               |                       |              |           |            |           | B<br><i>In-vivo</i> skin exposure |                       |                               |            |        |            |           |           |
|-----------------------------------|-------------------------------|-----------------------|--------------|-----------|------------|-----------|-----------------------------------|-----------------------|-------------------------------|------------|--------|------------|-----------|-----------|
| Sample                            | Dose UV-C (J/m <sup>2</sup> ) | Recovery time (hours) | rRNA (ng/ul) | RIN value | mRNA ng/ul | Array     | Sample Mouse                      | Recovery time (hours) | Dose UV-B (J/m <sup>2</sup> ) | rRNA ng/ul | RIN    | mRNA ng/ul | Array     |           |
| 36                                | 0                             | 0                     | 40.05        | 10        | 695.61     | 448431A12 | 46                                | 5                     | 0                             | 234.07     | 8.1    | 307.52     | 527442A01 |           |
| 25                                | 0                             | 0.17                  | 38.78        | 9.6       | 606.97     | 448431A01 | 22                                | 5                     | 3                             | 79.58      | 7.4    | 274.96     | 527372A01 |           |
| 19                                | 0                             | 0.5                   | 42.25        | 9.6       | 629.11     | 447355A07 | 1                                 | 5                     | 9                             | 105.96     | 7.5    | 403.6      | 526839A01 |           |
| 10                                | 0                             | 1                     | 40.7         | 10        | 636.16     | 447333A10 | 19                                | 5                     | 24                            | 141.92     | 7.3    | 350.88     | 527334A10 |           |
| 11                                | 0                             | 3                     | 43.9         | 10        | 787.2      | 447333A11 | 34                                | 5                     | 48                            | 72.46      | 6.9    | 238        | 527374A01 |           |
| 37                                | 0                             | 6                     | 51.77        | 10        | 616.65     | 448536A01 | 27                                | 6                     | 0                             | 122.78     | 8.2    | 165.84     | 527372A06 |           |
| 20                                | 0                             | 12                    | 70.37        | 9.8       | 592.6      | 447355A08 | 11                                | 6                     | 1                             | 136.79     | 8.1    | 283.12     | 527334A02 |           |
| 3                                 | 0                             | 24                    | 139.75       | 10        | 572.56     | 447333A03 | 42                                | 6                     | 6                             | 215.69     | 7.7    | 328.48     | 527374A09 |           |
| 46                                | 0                             | 48                    | 231.13       | 9.5       | 412.83     | 448536A10 | 9                                 | 6                     | 12                            | 248.96     | 8.2    | 233.04     | 526839A09 |           |
| 26                                | 0.25                          | 0.5                   | 38.8         | 9.6       | 545.39     | 448431A02 | 52                                | 6                     | 48                            | 129.96     | 7.4    | 177.2      | 527442A07 |           |
| 45                                | 0.25                          | 1                     | 45.85        | 9.9       | 770.15     | 448536A09 | 4                                 | 7                     | 0                             | 178.19     | 8.6    | 126.32     | 526839A04 |           |
| 27                                | 0.25                          | 3                     | 47.41        | 9.9       | 668.3      | 448431A03 | 12                                | 7                     | 3                             | 121.41     | 7.4    | 172        | 527334A03 |           |
| 43                                | 0.25                          | 6                     | 39.04        | 10        | 573.75     | 448536A07 | 43                                | 7                     | 9                             | 115.7      | 8.0    | 292.4      | 527374A10 |           |
| 15                                | 0.25                          | 10                    | 39.27        | 9.9       | 504.25     | 447355A03 | 55                                | 7                     | 24                            | 155.61     | 8.7    | 424.88     | 527442A10 |           |
| 4                                 | 0.25                          | 12                    | 74           | 10        | 571.87     | 447333A04 | 30                                | 7                     | 48                            | 104.54     | 8.2    | 277.84     | 527372A09 |           |
| 22                                | 0.25                          | 24                    | 121.06       | 10        | 605.48     | 447355A10 | 29                                | 8                     | 0                             | 117.99     | 9.0    | 108.16     | 527372A08 |           |
| 5                                 | 0.25                          | 48                    | 263.89       | 10        | 622.86     | 447333A05 | 58                                | 8                     | 1                             | 62.86      | 7.7    | 37.52      | 527334A11 |           |
| 6                                 | 0.75                          | 0.17                  | 35.6         | 9.8       | 546.19     | 447333A06 | 20                                | 8                     | 6                             | 157.97     | 7.9    | 419.76     | 527334A11 |           |
| 48                                | 0.75                          | 0.5                   | 41.99        | 9.3       | 455.29     | 448536A12 | 49                                | 8                     | 12                            | 115.99     | 7.3    | 304.4      | 527442A04 |           |
| 21                                | 0.75                          | 1                     | 43.97        | 9.9       | 587.26     | 447355A09 | 40                                | 8                     | 48                            | 92         | 7.8    | 322.56     | 527374A07 |           |
| 47                                | 0.75                          | 3                     | 49.29        | 10        | 637.41     | 448536A11 | 58                                | 9                     | 0                             | 102.34     | 8.7    | 41.36      | 527372A04 |           |
| 16                                | 0.75                          | 6                     | 42.23        | 10        | 663.57     | 447355A04 | 25                                | 9                     | 3                             | 180        | 191.56 | 7.9        | 281.68    | 527372A04 |
| 31                                | 0.75                          | 12                    | 68.47        | 10        | 606.73     | 448431A07 | 17                                | 9                     | 9                             | 180        | 190.63 | 7.7        | 426.08    | 527334A08 |
| 12                                | 0.75                          | 24                    | 125.27       | 10        | 831.93     | 447333A12 | 39                                | 9                     | 24                            | 180        | 117.45 | 8.3        | 374       | 527374A06 |
| 34                                | 0.75                          | 48                    | 274.03       | 10        | 614.49     | 448431A10 | 53                                | 9                     | 48                            | 180        | 151.17 | 7.9        | 379.52    | 527442A08 |
| 9                                 | 2.25                          | 0.17                  | 25.2         | 10        | 307.97     | 447333A09 | 47                                | 10                    | 0                             | 139.22     | 8.7    | 328.64     | 527442A02 |           |
| 40                                | 2.25                          | 0.5                   | 44.01        | 10        | 747.89     | 448536A04 | 38                                | 10                    | 1                             | 180        | 111.57 | 8.2        | 464.88    | 527374A05 |
| 17                                | 2.25                          | 3                     | 48.18        | 9.8       | 763.07     | 447355A05 | 32                                | 10                    | 6                             | 180        | 118.51 | 7.2        | 424.08    | 527372A11 |
| 30                                | 2.25                          | 6                     | 53.82        | 9.9       | 570.79     | 448431A06 | 21                                | 10                    | 12                            | 180        | 84.21  | 6.8        | 317.04    | 527334A12 |
| 39                                | 2.25                          | 12                    | 68.38        | 10        | 575.98     | 448536A03 | 3                                 | 10                    | 48                            | 180        | 85.98  | 7.0        | 307.36    | 526839A03 |
| 13                                | 2.25                          | 24                    | 128.85       | 10        | 717.27     | 447355A01 | 10                                | 11                    | 0                             | 179.86     | 9.0    | 325.2      | 527334A01 |           |
| 35                                | 2.25                          | 48                    | 232.55       | 9.1       | 656.41     | 448431A11 | 44                                | 11                    | 3                             | 360        | 142.98 | 8.8        | 334       | 527374A11 |
| 29                                | 6.7                           | 0.17                  | 39.93        | 9.7       | 518.55     | 448431A05 | 23                                | 11                    | 9                             | 360        | 162.81 | 7.5        | 350.32    | 527372A02 |
| 7                                 | 6.7                           | 0.5                   | 39.38        | 9.9       | 585.01     | 447333A07 | 8                                 | 11                    | 24                            | 360        | 146.81 | 8.7        | 287.04    | 526839A08 |
| 2                                 | 6.7                           | 1                     | 41.18        | 10        | 784.67     | 447333A02 | 50                                | 11                    | 48                            | 360        | 167.58 | 8.0        | 384.96    | 527442A05 |
| 42                                | 6.7                           | 3                     | 44.09        | 9.4       | 651.1      | 448536A06 | 35                                | 12                    | 0                             | 85.9       | 8.4    | 293.6      | 527374A02 |           |
| 28                                | 6.7                           | 6                     | 57.23        | 9.4       | 558.46     | 448431A04 | 54                                | 12                    | 1                             | 360        | 111.46 | 7.8        | 301.76    | 527442A09 |
| 24                                | 6.7                           | 12                    | 54.41        | 10        | 607.17     | 447355A12 | 5                                 | 12                    | 6                             | 360        | 99.52  | 7.5        | 352.32    | 526839A05 |
| 44                                | 6.7                           | 24                    | 115.51       | 10        | 587.45     | 448536A08 | 28                                | 12                    | 12                            | 360        | 111.96 | 7.6        | 391.44    | 527372A07 |
| 18                                | 6.7                           | 48                    | 184.63       | 10        | 671.64     | 447355A06 | 16                                | 12                    | 48                            | 360        | 121.4  | 6.8        | 304.56    | 527334A07 |
| 41                                | 20                            | 0.17                  | 41.53        | 10        | 570.63     | 448536A05 | 6                                 | 13                    | 0                             | 119.79     | 8.1    | 172.32     | 526839A06 |           |
| 14                                | 20                            | 0.5                   | 42.18        | 10        | 633.77     | 447355A02 | 48                                | 13                    | 3                             | 540        | 139.17 | 7.0        | 321.12    | 527442A03 |
| 38                                | 20                            | 1                     | 44.91        | 9.6       | 539.92     | 448536A02 | 45                                | 13                    | 9                             | 540        | 108.84 | 7.0        | 444.16    | 527374A12 |
| 1                                 | 20                            | 3                     | 36.84        | 10        | 394.29     | 447333A01 | 26                                | 13                    | 24                            | 540        | 128.71 | 8.2        | 381.12    | 527372A05 |
| 8                                 | 20                            | 6                     | 47.66        | 9.3       | 527.46     | 447333A08 | 13                                | 13                    | 48                            | 540        | 235.67 | 8.7        | 318.64    | 527334A04 |
| 32                                | 20                            | 12                    | 33.04        | 9.4       | 721.5      | 448431A08 | 18                                | 14                    | 0                             | 113.11     | 8.3    | 152.24     | 527334A09 |           |
| 33                                | 20                            | 24                    | 48.81        | 10        | 645.08     | 448431A09 | 2                                 | 14                    | 1                             | 540        | 327.78 | 8.9        | 267.84    | 526839A02 |
| 23                                | 20                            | 48                    | 51.51        | 10        | 747.69     | 447355A11 | 51                                | 14                    | 6                             | 540        | 125.14 | 7.6        | 383.92    | 527442A06 |
|                                   |                               |                       |              |           |            |           | 41                                | 14                    | 12                            | 540        | 103.24 | 7.7        | 384.16    | 527374A08 |
|                                   |                               |                       |              |           |            |           | 31                                | 14                    | 48                            | 540        | 116.9  | 7.1        | 305.12    | 527372A10 |
|                                   |                               |                       |              |           |            |           | 14                                | 15                    | 0                             | 172.74     | 8.5    | 210.72     | 527334A05 |           |
|                                   |                               |                       |              |           |            |           | 7                                 | 15                    | 3                             | 720        | 141.55 | 8.2        | 293.28    | 526839A07 |
|                                   |                               |                       |              |           |            |           | 56                                | 15                    | 9                             | 720        | 99.31  | 8.6        | 417.68    | 527442A11 |
|                                   |                               |                       |              |           |            |           | 24                                | 15                    | 24                            | 720        | 137.65 | 7.7        | 412.8     | 527372A03 |
|                                   |                               |                       |              |           |            |           | 37                                | 15                    | 48                            | 720        | 197.32 | 8.0        | 380.32    | 527374A04 |
|                                   |                               |                       |              |           |            |           | 36                                | 16                    | 0                             | 178.48     | 8.3    | 335.12     | 527374A03 |           |
|                                   |                               |                       |              |           |            |           | 33                                | 16                    | 1                             | 720        | 126.91 | 7.9        | 405.84    | 527372A12 |
|                                   |                               |                       |              |           |            |           | 57                                | 16                    | 6                             | 720        | 125.67 | 7.6        | 383.52    | 527442A12 |
|                                   |                               |                       |              |           |            |           | 58                                | 16                    | 12                            | 720        | 63.31  | 7.0        | 47.12     | 527372A06 |
|                                   |                               |                       |              |           |            |           | 15                                | 16                    | 48                            | 720        | 209.9  | 7.4        | 274.32    | 527334A06 |
