# Supplementary material for: A Range Finding Protocol to Support Design for Transcriptomics Experimentation: Examples of In-Vitro and In-Vivo Murine UV Exposure
Source: PubMed Central journal article supplement (PMC4019648; doi:10.1371/journal.pone.0097089), 2014-05-13
Supplement: pone.0097089.s007.pdf [file pone.0097089.s007.pdf]

Table\_S3. *In-vitro* examples of dose-response correlations of individual genes per time point

Dose response correlations per time point of individual genes that belong to gene sets: KEGG nucleotide excision repair, KEGG cell cycle, KEGG extrinsic apoptosis and IARC p53 responsive elements, in the *in-vitro* experiment (set up as Table 1).

| Nucleotide Excision Repair |       |       |       |       |      |
|----------------------------|-------|-------|-------|-------|------|
| gene                       | 0.17h | 0.5h  | 1h    | 3h    | 6h   |
| Rfc3                       | 0.82  |       |       |       | 0.8  |
| Erc2                       |       | -0.93 |       |       |      |
| Pole3                      |       | 0.88  | 0.95  |       |      |
| Cetn2                      |       | 0.88  |       |       | 0.94 |
| Pold3                      |       | -0.85 |       |       |      |
| Pold4                      |       | 0.81  |       |       |      |
| Mnat1                      |       |       | -0.97 | -0.86 |      |
| Xpa                        |       |       | 0.88  |       |      |
| Rbx1                       |       |       | 0.87  |       |      |
| Gtf2h2                     |       |       | -0.85 |       |      |
| Erc5                       |       |       | 0.82  | 0.88  |      |
| Gtf2h1                     |       |       | 0.82  |       |      |
| Rfc4                       |       |       |       |       | 0.91 |
| Rfc5                       |       |       |       |       | 0.89 |
| Pold2                      |       |       |       | -0.88 |      |
| Rad23b                     |       |       |       |       | 0.88 |
| Erc4                       |       |       |       |       | 0.87 |
| Erc8                       |       |       |       |       | 0.85 |
| Gtf2h5                     |       |       |       |       | 0.83 |
| Erc1                       |       |       |       | -0.82 |      |
| Xpc                        |       |       |       |       | 0.82 |

location of the sweet spot

| Cell Cycle |       |       |       |       |       |
|------------|-------|-------|-------|-------|-------|
| gene       | 0.17h | 0.5h  | 1h    | 3h    | 6h    |
| Gsk3b      | -0.93 |       |       | -0.86 |       |
| Mcm4       | -0.92 |       |       |       | 0.89  |
| Mdm2       | -0.87 |       |       | 0.9   | 0.88  |
| Cdkn2c     | 0.84  |       |       |       |       |
| Ywhae      | -0.8  |       |       |       | -0.91 |
| Cdk6       |       | 0.95  |       | -0.96 |       |
| Gadd45a    |       | 0.92  | 0.99  |       | -0.92 |
| Atm        |       | 0.92  |       |       | 0.95  |
| Cdc25a     |       | -0.83 | -0.85 |       | 0.84  |
| Anapc1     |       | 0.83  |       |       |       |
| Esp1       |       | -0.82 |       | 0.97  |       |
| Tgfb2      |       |       | 0.97  | -0.95 |       |
| Ccnb1      |       |       | 0.97  | -0.91 |       |
| Cdkn2a     |       |       | 0.93  |       | 0.94  |
| Cdc27      |       |       | -0.91 |       |       |
| Smad2      |       |       | -0.9  |       | 0.8   |
| Gadd45g    |       |       | -0.88 | -0.83 | -0.96 |
| Cdc20      |       |       | -0.87 | -0.82 |       |
| Wee1       |       |       | -0.87 |       | 0.93  |
| Smad3      |       |       | -0.86 | -0.93 |       |
| Ep300      |       |       | -0.86 |       |       |
| Anapc7     |       |       | -0.86 |       |       |
| Abl1       |       |       | -0.85 |       |       |
| Cdc25c     |       |       | 0.84  |       |       |
| Gm5593     |       |       |       | -1    | 0.82  |
| Stag1      |       |       |       | -0.97 | -0.81 |
| Bub1b      |       |       |       | -0.97 |       |
| Cdc14a     |       |       |       | -0.96 | -0.87 |
| Stag2      |       |       |       | -0.96 |       |
| Tfdp2      |       |       |       | -0.96 |       |
| Mad11      |       |       |       | -0.94 |       |
| Cdc7       |       |       |       | 0.93  | 0.89  |
| Atr        |       |       |       | -0.92 |       |
| Rb1        |       |       |       | -0.91 | -0.83 |
| Cdc25b     |       |       |       | -0.91 |       |
| Ccna2      |       |       |       | -0.9  |       |
| Cdc14b     |       |       |       | -0.89 |       |
| Dbf4       |       |       |       | 0.89  |       |
| Anapc11    |       |       |       | 0.89  |       |
| Cdkn1a     |       |       |       | 0.88  | 0.91  |
| Cdkn1c     |       |       |       | 0.87  |       |
| Rbx1       |       |       |       | 0.87  |       |
| Mad2l2     |       |       |       | 0.86  | 0.81  |
| Ccnb2      |       |       |       | 0.85  |       |
| Chek1      |       |       |       | 0.83  | 0.98  |
| Anapc10    |       |       |       | -0.81 |       |
| Skp2       |       |       |       |       | 0.95  |
| Tgfb3      |       |       |       |       | -0.94 |
| Orc3l      |       |       |       |       | -0.93 |
| Anapc5     |       |       |       |       | -0.9  |
| Cdk4       |       |       |       |       | 0.89  |
| Gadd45b    |       |       |       |       | -0.88 |
| Ywhab      |       |       |       |       | -0.88 |
| Skp1a      |       |       |       |       | 0.87  |
| Anapc13    |       |       |       |       | 0.87  |
| E2f2       |       |       |       |       | 0.86  |
| Ccnd1      |       |       |       |       | 0.84  |
| Cdkn2b     |       |       |       |       | 0.84  |
| Cdkn2d     |       |       |       |       | -0.82 |
| Prkdc      |       |       |       |       | -0.82 |
| Orc6l      |       |       |       |       | 0.82  |
| Myc        |       |       |       |       | -0.81 |

| Extrinsic Apoptosis |       |      |       |       |       |
|---------------------|-------|------|-------|-------|-------|
| gene                | 0.17h | 0.5h | 1h    | 3h    | 6h    |
| Apaf1               | -0.92 |      |       |       |       |
| Ii1b                | 0.91  |      |       |       | 0.83  |
| Tnf                 |       | 0.92 | 0.9   | 0.82  |       |
| Atm                 |       | 0.92 |       |       | 0.95  |
| Pik3r5              |       | 0.92 |       |       | -0.85 |
| Irak2               |       | -0.9 |       |       |       |
| Prkar2a             |       | -0.9 |       |       |       |
| Tradd               |       |      | 0.96  |       |       |
| Traf2               |       |      | -0.95 |       | 0.9   |
| Capn2               |       |      | -0.92 |       |       |
| Nfkb1               |       |      | -0.91 |       |       |
| Chuk                |       |      | -0.89 |       |       |
| Cflar               |       |      | -0.88 | 0.92  | 0.81  |
| Akt3                |       |      | -0.87 | -0.97 | -0.88 |
| Bcl2l1              |       |      | -0.85 |       |       |
| Tnfrsf10            |       |      | 0.81  |       |       |
| Casp9               |       |      | 0.8   |       | 0.95  |
| Fadd                |       |      | 0.8   |       |       |
| Birc7               |       |      |       | 1     | 0.82  |
| Casp3               |       |      |       | 0.96  | 0.95  |
| Prkar1b             |       |      |       | -0.91 | -0.87 |
| 1500003O03Rik       |       |      |       | 0.89  |       |
| Pik3cb              |       |      |       | -0.88 |       |
| Prkx                |       |      |       | 0.87  | 0.92  |
| Ppp3cb              |       |      |       | -0.87 |       |
| Ppp3cc              |       |      |       | -0.83 | -0.94 |
| Cyca                |       |      |       | 0.82  | 0.85  |
| Pik3cg              |       |      |       | -0.81 |       |
| Tnfrsf10b           |       |      |       |       | 0.95  |
| Casp12              |       |      |       |       | 0.94  |
| Casp6               |       |      |       |       | 0.88  |
| Ripk1               |       |      |       |       | 0.88  |
| Ppp3ca              |       |      |       |       | -0.87 |
| Prkacb              |       |      |       |       | -0.84 |
| Akt1                |       |      |       |       | -0.83 |
| Prkar2b             |       |      |       |       | -0.82 |
| Irak1               |       |      |       |       | -0.8  |

| p53 Responsive Elements |       |      |      |      |       |
|-------------------------|-------|------|------|------|-------|
| gene                    | 0.17h | 0.5h | 1h   | 3h   | 6h    |
| Mdm2                    | -0.87 |      |      | 0.9  | 0.88  |
| Ccng1                   |       |      | 0.95 | 0.85 | 0.84  |
| Lrdd                    |       |      |      | 0.99 | 0.8   |
| Cdkn1a                  |       |      |      | 0.88 | 0.91  |
| Tnfrsf10b               |       |      |      |      | 0.95  |
| Gadd45b                 |       |      |      |      | -0.88 |
