# Supplementary material for: A Range Finding Protocol to Support Design for Transcriptomics Experimentation: Examples of In-Vitro and In-Vivo Murine UV Exposure
Source: PubMed Central journal article supplement (PMC4019648; doi:10.1371/journal.pone.0097089), 2014-05-13
Supplement: pone.0097089.s008.pdf [file pone.0097089.s008.pdf]

Table S4. *In-vivo* examples of dose-response correlations of individual genes per time point

Dose response correlations per time point of individual genes that belong to gene sets: KEGG nucleotide excision repair, KEGG cell cycle, KEGG extrinsic apoptosis and IARC p53 responsive elements, in the *in-vivo* experiment (set up as Table 2).

| Nucleotide Excision Repair |       |       |       |       |      |      |      |
|----------------------------|-------|-------|-------|-------|------|------|------|
| gene                       | 1h    | 3h    | 6h    | 9h    | 12h  | 24h  | 48h  |
| Pole3                      | -0.97 |       |       | 0.97  | 0.97 | 0.92 |      |
| Pold4                      |       | 0.89  | 0.91  |       |      |      |      |
| Mnat1                      |       | -0.87 | -0.95 |       |      |      |      |
| Pole4                      |       | 0.86  | 0.93  | 0.85  |      |      |      |
| Ercc1                      |       | 0.86  |       | 0.82  | 0.81 |      |      |
| Ercc6                      |       |       | 0.96  |       |      |      |      |
| Rfc5                       |       |       | 0.9   | -0.8  | 0.95 |      | 0.94 |
| Ercc5                      |       |       | 0.88  | 0.81  |      |      |      |
| Rfc1                       |       |       | -0.86 |       |      |      | 0.85 |
| Ccnh                       |       |       | -0.84 |       |      | 0.95 |      |
| Ddb2                       |       |       |       | -0.96 |      |      |      |
| Xpc                        |       |       |       | -0.93 |      |      |      |
| Gtf2h3                     |       |       |       | 0.88  |      |      |      |
| Rfc3                       |       |       |       | 0.87  | 0.98 |      | 0.92 |
| Pcna                       |       |       |       | 0.81  | 0.86 |      |      |
| Cdk7                       |       |       |       | 0.81  |      |      |      |
| Xpa                        |       |       |       |       | -1   |      |      |
| Pole2                      |       |       |       | 0.99  |      |      |      |
| Gm9840                     |       |       |       | 0.97  | 0.92 |      |      |
| Gtf2h1                     |       |       |       | 0.95  | 0.87 |      |      |
| Gtf2h5                     |       |       |       | 0.92  | 0.9  |      |      |
| Rfc2                       |       |       |       | 0.91  |      |      | 0.84 |
| Rpa2                       |       |       |       | 0.91  | 0.82 |      |      |
| Lig1                       |       |       |       | 0.85  |      |      | 0.81 |
| Rfc4                       |       |       |       | 0.84  |      |      |      |
| Pole                       |       |       |       | 0.8   |      |      | 0.92 |
| Rbx1                       |       |       |       | 0.8   |      |      |      |
| Ddb1                       |       |       |       |       |      |      | 0.88 |
| Ercc2                      |       |       |       |       |      |      | 0.86 |
| Pold3                      |       |       |       |       |      |      | 0.84 |
| Rpa1                       |       |       |       |       |      |      | 0.81 |

| Cell Cycle |       |       |       |       |       |       |      |
|------------|-------|-------|-------|-------|-------|-------|------|
| gene       | 1h    | 3h    | 6h    | 9h    | 12h   | 24h   | 48h  |
| Ccnd3      | 1     |       |       |       |       |       |      |
| E2f3       | -0.91 |       |       |       |       |       |      |
| Rb1        | -0.9  |       | -0.91 |       |       |       |      |
| Mad2l2     | 0.88  |       |       |       |       |       | 0.93 |
| Cdc25c     | -0.86 |       |       |       |       |       | 0.8  |
| Ccnb2      | -0.85 |       | -0.86 |       |       |       |      |
| Fzr1       | 0.83  |       | 0.86  |       |       |       |      |
| Tgfb1      | 0.81  |       | -0.84 |       |       |       |      |
| Smad3      | 0.81  |       |       |       |       |       |      |
| Pkmyt1     |       | 0.98  |       |       |       |       | 0.94 |
| Smc3       |       | -0.97 |       |       |       | -0.88 |      |
| Cdc14b     |       | -0.96 | -0.88 | -0.81 | -0.91 |       |      |
| E2f5       |       | 0.93  |       |       |       |       |      |
| Myc        |       | 0.91  |       |       |       |       |      |
| Anapc7     |       | 0.88  |       |       | 0.91  |       |      |
| Anapc4     |       | -0.86 |       |       |       |       |      |
| Gadd45g    |       | 0.83  |       |       |       |       |      |
| Cdc14a     |       | 0.82  |       |       |       | -0.81 |      |
| Tgfb3      |       |       | -0.93 |       |       |       | 0.83 |
| Mdm2       |       |       | 0.92  | 0.89  | 0.8   | 0.88  |      |
| Cdkn1a     |       |       | 0.91  | 0.86  | 0.95  | 0.94  | 0.85 |
| Chek2      |       |       | -0.89 |       | 0.9   |       |      |
| Stag2      |       |       | -0.88 |       |       |       |      |
| Atr        |       |       | -0.86 |       | -0.94 |       |      |
| Mad2l1     |       |       | -0.85 |       | 0.96  |       |      |
| Ccna2      |       |       | -0.85 |       |       |       | 0.88 |
| Cdkn2d     |       |       | -0.85 |       |       |       |      |
| Bub1b      |       |       | -0.84 | -0.9  |       |       |      |
| Ccnh       |       |       | -0.84 |       |       |       | 0.95 |
| Ccnd2      |       |       | -0.83 |       |       |       |      |
| Cdk6       |       |       | -0.83 |       |       | 0.85  |      |
| Cdc20      |       |       | -0.82 |       | 0.8   |       | 0.92 |
| Cdc25b     |       |       | -0.81 |       |       |       |      |
| Cdc7       |       |       | 0.8   |       | 0.93  |       | 0.94 |
| Stag1      |       |       | -0.8  |       |       |       |      |
| Rbl2       |       |       |       | -0.97 |       | -0.86 |      |
| Bub1       |       |       |       | -0.91 |       |       | 0.86 |
| Rbl1       |       |       |       | -0.91 |       |       | 0.92 |
| Tfdp2      |       |       |       | -0.89 |       | -0.85 |      |
| Ywhab      |       |       |       | 0.85  |       | 0.85  |      |
| Cdc16      |       |       |       | 0.82  |       |       |      |
| Pcna       |       |       |       | 0.81  | 0.86  |       |      |
| Cdk7       |       |       |       | 0.81  |       |       |      |
| Mcm4       |       |       |       |       | 0.98  |       | 0.86 |
| Gm9840     |       |       |       |       | 0.97  | 0.92  |      |
| Ccnd1      |       |       |       |       | 0.95  |       |      |
| Cdkn1c     |       |       |       |       | -0.95 |       |      |
| Gm2423     |       |       |       |       | 0.94  |       |      |
| Ccnb3      |       |       |       |       | -0.94 |       |      |
| Mcm7       |       |       |       |       | 0.93  |       | 0.94 |
| Dbf4       |       |       |       |       | 0.92  |       | 0.84 |
| Cdc23      |       |       |       |       | 0.92  |       |      |
| Cdc2a      |       |       |       |       | 0.91  |       | 0.87 |
| Ywhaq      |       |       |       |       | 0.91  |       |      |
| Bub3       |       |       |       |       | 0.89  |       | 0.88 |
| Cdc45l     |       |       |       |       | 0.89  |       | 0.95 |
| Ep300      |       |       |       |       | 0.88  | 0.89  |      |
| Prkdc      |       |       |       |       | -0.85 | -0.86 |      |
| Orc6l      |       |       |       |       | 0.85  |       |      |
| Ywhag      |       |       |       |       | 0.84  |       |      |
| Orc3l      |       |       |       |       | -0.84 |       |      |
| Orc2l      |       |       |       |       | 0.83  |       |      |
| Cdkn2b     |       |       |       |       | 0.82  |       |      |
| Orc1l      |       |       |       |       | 0.82  |       | 0.88 |
| Orc4l      |       |       |       |       | 0.82  | 0.82  |      |
| Rbx1       |       |       |       |       | 0.8   |       |      |
| E2f4       |       |       |       |       |       | 0.81  |      |
| Ccne2      |       |       |       |       |       |       | 0.84 |
| Mcm3       |       |       |       |       |       |       | 0.94 |
| Mcm2       |       |       |       |       |       |       | 0.85 |
| Mcm5       |       |       |       |       |       |       | 0.9  |
| Tfdp1      |       |       |       |       |       |       | 0.8  |
| Tgfb2      |       |       |       |       |       | -0.92 |      |
| Trp53      |       |       |       |       |       | 0.88  |      |
| Pttg1      |       |       |       |       |       |       | 0.85 |
| Sfn        |       |       |       |       |       | 0.86  |      |
| Anapc11    |       |       |       |       |       |       | 0.82 |

| Extrinsic Apoptosis |       |       |       |       |       |       |      |
|---------------------|-------|-------|-------|-------|-------|-------|------|
| gene                | 1h    | 3h    | 6h    | 9h    | 12h   | 24h   | 48h  |
| Ilrak4              | 0.93  |       |       |       |       |       |      |
| Il1rap              | -0.91 | -0.82 | -0.9  | -0.85 | -0.8  |       |      |
| Akt3                | 0.89  |       |       |       | -0.92 |       |      |
| Ppp3cc              | -0.87 |       | -0.82 |       |       |       |      |
| Akt2                | 0.86  |       |       |       |       |       |      |
| Pik3cb              | -0.83 | -0.83 |       | -0.85 | -0.92 | -0.8  |      |
| Prkar1b             | 0.83  |       |       |       |       |       |      |
| Csf2rb              | 0.82  |       |       |       |       |       |      |
| Bcl2                | -0.81 |       | -0.87 |       |       | -0.94 |      |
| Ilrak2              |       | -0.93 |       |       |       |       |      |
| Ngf                 |       | 0.9   | 0.9   | 0.81  | 0.99  | 0.84  |      |
| Dffa                |       | -0.87 | -0.91 |       | -0.88 |       |      |
| Prkacb              |       | -0.87 | -0.85 |       |       |       | -0.9 |
| Bid                 |       | 0.87  |       |       |       |       |      |
| Pik3cd              |       | -0.87 |       |       |       |       |      |
| Prkar1a             |       | 0.85  |       | 0.9   |       |       |      |
| Fas                 |       | -0.85 |       |       |       |       |      |
| Tnfsf10             |       | -0.83 |       |       |       |       |      |
| Pik3r5              |       | -0.8  |       |       |       | 0.81  |      |
| Tnfrsf10b           |       |       | 0.9   | 0.89  | 0.86  | 0.89  |      |
| Myd88               |       |       | 0.9   |       |       | 0.82  |      |
| Pik3ca              |       |       | -0.9  |       |       |       |      |
| Ppp3ca              |       |       | -0.89 | -0.89 | -0.98 |       |      |
| Pik3r2              |       |       | -0.87 |       |       |       |      |
| Nfkb1               |       |       | -0.85 |       |       |       |      |
| Tradd               |       |       | 0.84  |       | 0.85  |       |      |
| Birc7               |       |       |       | -0.85 |       |       |      |
| Il1a                |       |       |       |       | -0.87 |       |      |
| Traf2               |       |       |       |       | 0.85  |       |      |
| Fasl                |       |       |       |       | 0.83  |       |      |
| Ppp3r1              |       |       |       |       | 0.83  |       |      |
| 2010110P09Rik       |       |       |       |       | -0.82 |       |      |
| Chuk                |       |       |       |       |       |       | -0.8 |
| Csf2rb2             |       |       |       |       |       | 0.85  |      |
| Dffb                |       |       |       |       |       | 0.92  |      |
| Ntrk1               |       |       |       |       |       | 0.85  |      |
| Trp53               |       |       |       |       |       | 0.88  |      |
| 1500003O03Rik       |       |       |       |       |       |       | 0.92 |

| p53 Responsive Elements |       |       |      |       |       |       |      |
|-------------------------|-------|-------|------|-------|-------|-------|------|
| gene                    | 1h    | 3h    | 6h   | 9h    | 12h   | 24h   | 48h  |
| Msh2                    | -0.97 |       |      |       |       |       |      |
| Btg2                    | 0.95  |       |      |       |       |       |      |
| Igfbp3                  | -0.87 | -0.86 |      | -0.8  | -0.86 | -0.86 |      |
| Sesn1                   |       | -0.98 |      | -0.87 | -1    |       |      |
| S100a2                  |       | 0.94  |      |       |       |       |      |
| Pmaip1                  |       | 0.87  | 0.81 |       | 0.97  |       |      |
| Fas                     |       | -0.85 |      |       |       |       |      |
| Mdm2                    |       |       | 0.92 | 0.89  | 0.8   | 0.88  |      |
| Cdkn1a                  |       |       | 0.91 | 0.86  | 0.95  | 0.94  | 0.85 |
| Gml                     |       |       | 0.91 |       |       |       |      |
| Tnfrsf10b               |       |       | 0.9  | 0.89  | 0.86  | 0.89  |      |
| Pcna                    |       |       |      | 0.81  | 0.86  |       |      |
| Sfn                     |       |       |      |       |       | 0.86  |      |

location of the sweet spot
