# Supplementary material for: A Range Finding Protocol to Support Design for Transcriptomics Experimentation: Examples of In-Vitro and In-Vivo Murine UV Exposure
Source: PubMed Central journal article supplement (PMC4019648; doi:10.1371/journal.pone.0097089), 2014-05-13
Supplement: pone.0097089.s010.pdf [file pone.0097089.s010.pdf]

Data S1. Multiple longitudinal biopsies sampling in individual mice

## **A study to determine the maximum number of biopsies in a mouse model.**

**Setup:** four mice were biopsied, each with a maximum of 6 (A1-A). RNA from each sample was used in a standard microarray-based gene-expression analysis. Standard bioinformatics including Principal component analysis (PCA), EDGE analysis (<http://www.genomine.org/edge>) and Overrepresentation analyses were performed to examine the data.

**Results:** The mice underwent the biopsy sampling without any visible inconvenience. The animals did not show signs of irritation, scratching or biting around the areas of sampling until 48 hours after sampling of the first biopsy. PCA of microarray-based gene expression signals showed no significant variation between animals and time (A1-B). Gene expression analysis identified 169 differentially expressed genes (fdr-corrected p-value < 0.1). Overrepresentation analysis of these DEGs showed 26 biological processes being significantly affected in the response to the treatment (A1-C).

**Conclusions:** As no regulation of wound healing or immunological processes were present in the significant biological processes – processes that are likely to be caused by previous biopsies –, plus significant regulation was observed for the Circadian rhythm pathways, – a process that can be expected during sampling over time –, we concluded that biopsy sampling using several longitudinal samples in one animal – with a maximum of six biopsies per animal – over time is suitable for researching gene-expression in skin.

**Data:** The data from this study is available through GEO Series accession number GSE51347.

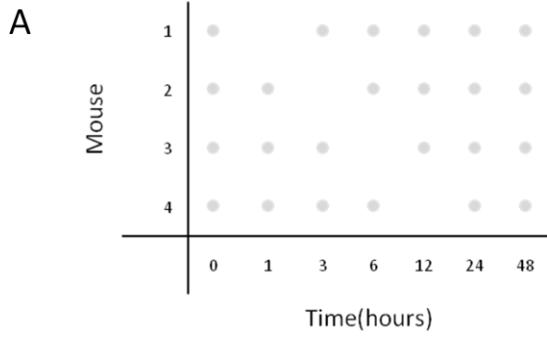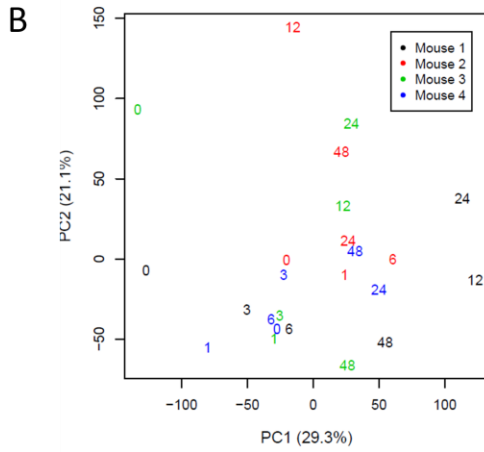

**C** Significant biological processes (p<0.05)

| Biological process                                 | P-Value  |
|----------------------------------------------------|----------|
| detoxification of copper ion                       | 3.55E-07 |
| transcription                                      | 3.71E-05 |
| regulation of transcription, DNA-dependent         | 9.55E-06 |
| <b>rhythmic process</b>                            | 1.53E-04 |
| nitric oxide mediated signal transduction          | 5.05E-05 |
| <b>circadian rhythm</b>                            | 9.16E-04 |
| cellular zinc ion homeostasis                      | 7.43E-04 |
| transcription termination                          | 7.43E-04 |
| cellular copper ion homeostasis                    | 0.002    |
| inter-male aggressive behavior                     | 0.007    |
| copper ion export                                  | 0.007    |
| mating behavior, sex discrimination                | 0.007    |
| regulation of RNA export from nucleus              | 0.007    |
| regulation of oxidative phosphorylation            | 0.007    |
| copper ion import                                  | 0.007    |
| activation of phospholipase C                      | 0.007    |
| epinephrine metabolic process                      | 0.007    |
| negative regulation of metalloenzyme activity      | 0.007    |
| retroviral genome replication                      | 0.007    |
| basal protein localization                         | 0.007    |
| establishment or maintenance of actin cytoskeleton | 0.007    |
| polarity                                           | 0.007    |
| synaptic vesicle priming                           | 0.007    |
| elastin biosynthetic process                       | 0.007    |
| territorial aggressive behavior                    | 0.007    |
| peptidyl-lysine modification                       | 0.028    |
