# Supplementary material for: A Range Finding Protocol to Support Design for Transcriptomics Experimentation: Examples of In-Vitro and In-Vivo Murine UV Exposure
Source: PLoS One. 2014 May 13;9(5):e97089. doi: 10.1371/journal.pone.0097089 (PMC4019648; doi:10.1371/journal.pone.0097089)
Supplement: Table S2 — Differentially expressed genes. The numbers of differentially expressed genes (DEGs, log2 FC>1) found in both experiments, if compared to time-point 0 (A & B, Figure 3A & B); after additional removal of genes that were differentially expressed in any untreated sample (C & D, Figure 3C & D); after re-calculation using the associated dose = 0 sample (log2 FC>1) (E & F, Figure 3E & F). Excluded samples are indicated in grey. (PDF) [file pone.0097089.s006.pdf]

Table\_S2. Differentially expressed genes

The numbers of differentially expressed genes (DEGs, log2 FC > 1) found in both experiments, if compared to time-point 0 (A & B, Figure 3A & B); after additional removal of genes that were differentially expressed in any untreated sample (C & D, Figure 3C & D); after re-calculation using the associated dose=0 sample (log2 FC > 1) (E & F, Figure 3E & F). Excluded samples are indicated in grey.

*In-vitro* MEF exposure

A

|           | 0.17 | 0.5  | 1    | 3    | 6    | 12   | 24   | 48   | union       | intersect |
|-----------|------|------|------|------|------|------|------|------|-------------|-----------|
| 20        | 410  | 406  | 750  | 2802 | 3411 | 3919 | 3156 | 2817 | 1120 (8839) | 95 (22)   |
| 6.7       | 200  | 238  | 541  | 1944 | 1809 | 2195 | 2846 | 2105 | 3344 (5962) | 30 (22)   |
| 2.25      | 626  | 534  |      | 637  | 1000 | 2418 | 2344 | 2085 | 2078 (4763) | 44 (27)   |
| 0.75      | 434  | 839  | 344  | 773  | 969  | 1999 | 2127 | 2021 | 2543 (4974) | 26 (23)   |
| 0.25      | 694  | 288  | 384  | 460  | 912  | 2203 | 2221 | 2241 | 1955 (4796) | 31 (24)   |
| 0         | 275  | 343  | 313  | 434  | 1194 | 1988 | 4179 | 2462 | 1854 (6288) | 30 (22)   |
| Union     | 1817 | 1806 | 1448 | 2751 | 2984 |      |      |      |             |           |
|           |      |      |      | 4559 | 5007 | 6155 | 6969 | 4956 |             |           |
| Intersect | 28   | 36   | 55   | 112  | 319  |      |      |      |             |           |
|           |      |      |      | 75   | 221  | 612  | 846  | 865  |             |           |

*In-vivo* skin exposure

B

|           | 1    | 3    | 6    | 9    | 12   | 24   | 48   | union | intersect |
|-----------|------|------|------|------|------|------|------|-------|-----------|
| 720       | 618  | 472  | 892  | 957  |      | 1169 | 654  | 2441  | 67        |
| 540       | 1153 | 1198 | 986  | 1285 | 775  | 1353 | 881  | 3494  | 46        |
| 360       | 247  | 192  | 695  | 531  | 570  | 357  | 748  | 1689  | 5         |
| 180       | 325  | 986  | 604  | 939  | 1015 | 508  | 520  | 2170  | 68        |
| 90        |      | 466  | 643  | 442  | 711  | 375  | 468  | 1674  | 66        |
| 0         | 198  | 494  | 553  | 479  | 795  | 341  | 461  | 1814  | 14        |
| Union     | 1811 | 2452 | 2203 | 2735 | 2052 | 2287 | 1786 |       |           |
| intersect | 16   | 4    | 154  | 30   | 148  | 65   | 80   |       |           |

C

|           | 0.17 | 0.5  | 1   | 3    | 6    | 12 | 24 | 48 | union | intersect |
|-----------|------|------|-----|------|------|----|----|----|-------|-----------|
| 20        | 133  | 144  | 363 |      |      |    |    |    | 556   | 7         |
| 6.7       | 42   | 82   | 282 | 1333 | 1193 |    |    |    | 2319  | 1         |
| 2.25      | 303  | 179  |     | 299  | 386  |    |    |    | 1042  | 0         |
| 0.75      | 182  | 630  | 126 | 338  | 290  |    |    |    | 1448  | 0         |
| 0.25      | 504  | 134  | 125 | 114  | 222  |    |    |    | 967   | 0         |
| Union     | 1042 | 1044 | 724 | 1727 | 1625 |    |    |    |       |           |
| intersect | 0    | 0    | 2   | 7    | 27   |    |    |    |       |           |

D

|           | 1   | 3    | 6    | 9    | 12  | 24   | 48  | union | intersect |
|-----------|-----|------|------|------|-----|------|-----|-------|-----------|
| 720       | 172 | 271  | 365  | 551  |     | 715  | 164 | 1471  | 5         |
| 540       | 648 | 587  | 429  | 742  | 323 | 681  | 452 | 2247  | 7         |
| 360       | 96  | 51   | 229  | 171  | 149 | 77   | 272 | 787   | 0         |
| 180       | 106 | 485  | 218  | 472  | 395 | 187  | 127 | 1177  | 20        |
| 90        |     | 255  | 265  | 124  | 183 | 144  | 89  | 824   | 0         |
| Union     | 906 | 1343 | 1150 | 1545 | 880 | 1296 | 816 |       |           |
| intersect | 5   | 0    | 1    | 6    | 2   | 2    | 2   |       |           |

E

|           | 0.17 | 0.5  | 1   | 3    | 6    | 12 | 24 | 48 | union | intersect |
|-----------|------|------|-----|------|------|----|----|----|-------|-----------|
| 20        | 142  | 163  | 240 |      |      |    |    |    | 498   | 3         |
| 6.7       | 81   | 143  | 150 | 1169 | 983  |    |    |    | 2098  | 1         |
| 2.25      | 353  | 118  |     | 307  | 195  |    |    |    | 901   | 0         |
| 0.75      | 178  | 737  | 177 | 270  | 107  |    |    |    | 1345  | 0         |
| 0.25      | 561  | 200  | 136 | 88   | 86   |    |    |    | 978   | 0         |
| Union     | 1140 | 1153 | 613 | 1502 | 1204 |    |    |    |       |           |
| intersect | 0    | 0    | 0   | 0    | 0    |    |    |    |       |           |

F

|           | 1    | 3    | 6    | 9    | 12   | 24   | 48  | union | intersect |
|-----------|------|------|------|------|------|------|-----|-------|-----------|
| 720       | 386  | 512  | 562  | 835  |      | 877  | 176 | 2364  | 2         |
| 540       | 1057 | 684  | 405  | 1460 | 398  | 673  | 355 | 3371  | 3         |
| 360       | 215  | 520  | 441  | 358  | 235  | 162  | 138 | 1665  | 0         |
| 180       | 161  | 294  | 314  | 621  | 434  | 323  | 119 | 1521  | 12        |
| 90        |      | 776  | 566  | 634  | 411  | 288  | 154 | 2155  | 1         |
| Union     | 1553 | 1988 | 1613 | 2513 | 1172 | 1547 | 723 |       |           |
| intersect | 0    | 0    | 0    | 0    | 0    | 0    | 0   |       |           |
